# Supplementary material for: Synthesis and structural characterization of monomeric mercury(ii) selenolate complexes derived from 2-phenylbenzamide ligands
Source: Royal Society of Chemistry journal article supplement (doi:10.1039/c5dt04356e), 2016-01-01
Supplement: c5dt04356e1.pdf [file c5dt04356e1.pdf]

Supporting information for

**Synthesis and Structural Characterization of Monomeric Mercury(II)  
Selenolate Complexes Derived from 2-Phenylbenzamide Ligands**

Saket Patel, Meenakshi, Ananda S. Hodage, Ajay Verma, Shailendra Agarwal, Abhimanyu  
Yadav, and Sangit Kumar\*

Department of Chemistry, Indian Institute of Science Education and Research (IISER) Bhopal,  
MP, India 462 066

[sangitkumar@iiserb.ac.in](mailto:sangitkumar@iiserb.ac.in)

| <b>Contents</b>                                                                                                                                                                      | <b>Page</b> |
|--------------------------------------------------------------------------------------------------------------------------------------------------------------------------------------|-------------|
| VT NMR study and thermal studies                                                                                                                                                     | S2-S5       |
| Thermal Study                                                                                                                                                                        | S5-S8       |
| $^1\text{H}$ , $^{13}\text{C}$ , $^{77}\text{Se}$ and mass spectra for diselenides, Isoselenazolones, and corresponding<br>Mercury selenolates                                       | S9-S55      |
| UV-Visible spectra of mercury selenolates                                                                                                                                            | S57         |
| Crystal structure description [CCDC no. 1059010 ( <b>2a</b> ), 1059009 ( <b>2c</b> ),<br>1019634 ( <b>2d</b> ), 1059007 ( <b>3a</b> ), 1059008 ( <b>3c</b> ), 1019635 ( <b>3d</b> )] | S58-S102    |

## General Experimental Details

All reactions were carried out under nitrogen atmosphere using standard vacuum-line techniques. Spectroscopic grade methanol and toluene, DMF and DMSO with sealed septa and 1,10-phenanthroline were used as received. All other solvents were purified by standard procedure and freshly distilled prior to use. Elemental selenium, copper iodide, succinimide,  $\text{CdCl}_2$ ,  $\text{ZnCl}_2$  and Hg were purchased from commercial sources (Aldrich/ Fluka) and used as received. 2-iodobenzoic acid, thionyl chloride and amines were purchased from Spectrochem Pvt. Ltd. Dichloromethane used from MBRAUN solvent drying system. Silica gel (100-200 mesh size) was used for column chromatography purchased from RANKEM Pvt. Ltd. India. TLC analysis of reaction mixtures was performed using Merck silica gel (60 F<sub>254</sub>) plates. Potassium carbonate and  $\text{ZnCl}_2$  were stored in desiccator and used under anhydrous conditions. Diselenides (1a, 1b, 1c) are known and mercury selenolates are unknown.

TLC analysis of reaction mixtures was performed using silica gel coated aluminum plates. NMR spectra were recorded on a Bruker Bio Spin GmbH-400 MHz spectrometer operating at 400.13 ( $^1\text{H}$ ), 100.61 ( $^{13}\text{C}$ ) and 76.31 ( $^{77}\text{SeMHz}$ ).  $^1\text{H}$  and  $^{13}\text{C}$  NMR chemical shifts were relative to internal chloroform peak ( $\delta = 7.24$  ppm for  $^1\text{H}$  and  $\delta = 77.0$  for  $^{13}\text{C}$  NMR). The  $^{77}\text{Se}$  NMR chemical shifts were relative to external diphenyl diselenide ( $\text{Ph}_2\text{Se}_2$ ) in  $\text{CDCl}_3$  ( $\delta = 463.0$  ppm relative to  $\text{Me}_2\text{Se}$  ( $\delta = 0$  ppm)). High resolution mass spectral (HRMS) analysis was performed for ion of  $^{80}\text{Se}$  on a quadrupole-time of flight (Q-TOF) mass spectrometer equipped with both, an ESI and APCI source. Silica gel (100-200mesh size) was used for column chromatography. The single-crystal diffraction studies were carried out on a Bruker APEX II diffractometer (Mo-K $\alpha$ ,  $\lambda = 0.71069$  Å). All crystal structures were solved by direct methods. The program SAINT (version 6.22) was used for integration of the intensity of reflections and scaling. The program SADABS was used for absorption correction. The crystal structures were solved and refined using the SHELXTL package. All hydrogen atoms were included in idealized positions, and a riding model was used. Non-hydrogen atoms were refined with anisotropic displacement parameters.

**VT NMR study and thermal studies.** For better understanding of non-bonding interactions in the complex variable temperature  $^1\text{H}$  NMR study has been carried out for diselenide **2a** and mercuryselenolate complex **3c**. The study suggests that Hg...O/Se...O non-bonding interactions are present in the compounds.

The variable temperature  $^1\text{H}$  NMR was recorded for compound **2a**. Interestingly, at low temperature ( $-20^\circ\text{C}$ ) two methyl peaks were separate and distinct but as the temperature increases gradually from  $-20^\circ\text{C}$  to  $0^\circ\text{C}$ ,  $20^\circ\text{C}$  and finally  $40^\circ\text{C}$  the two methyl peaks gradually merge and finally give a single peak at  $40^\circ\text{C}$ . This shows the fluxional behavior of the diselenide **2a** caused due to the Se...O non-bonding interaction which lapse at elevated temperature and results in a single peak at  $40^\circ\text{C}$  (Fig. S1).

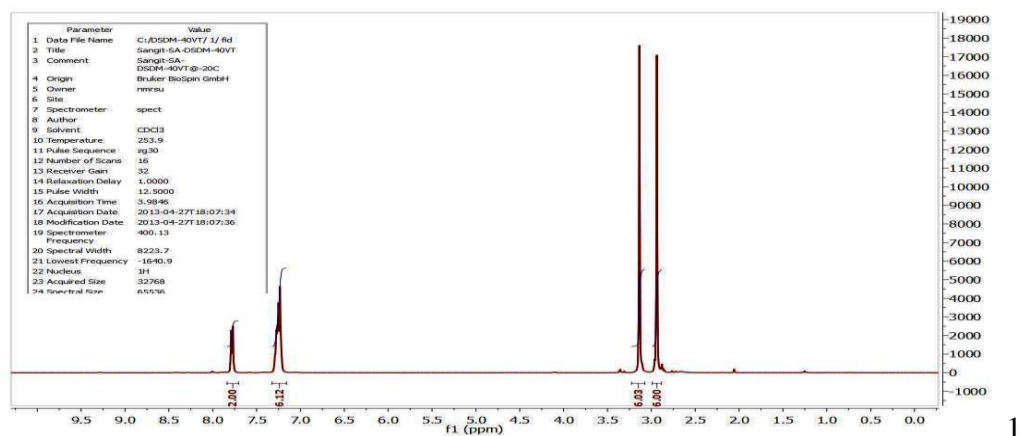

1

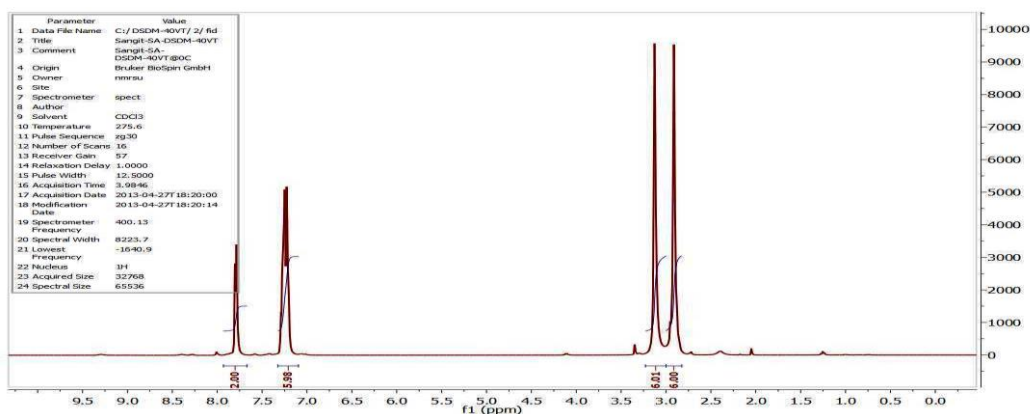

2

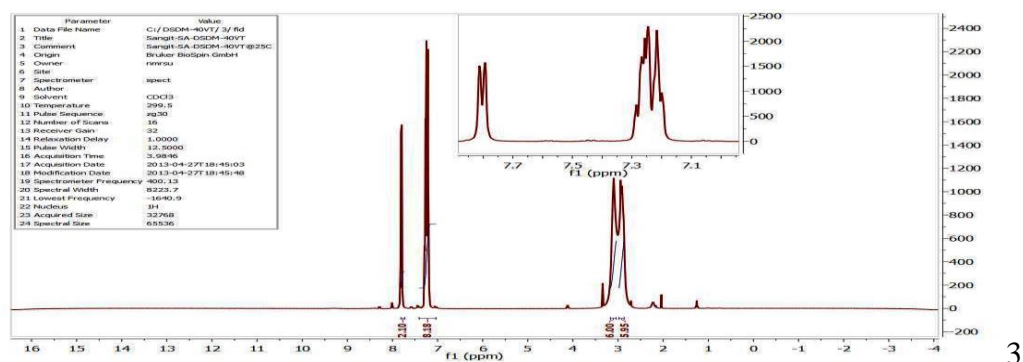

3

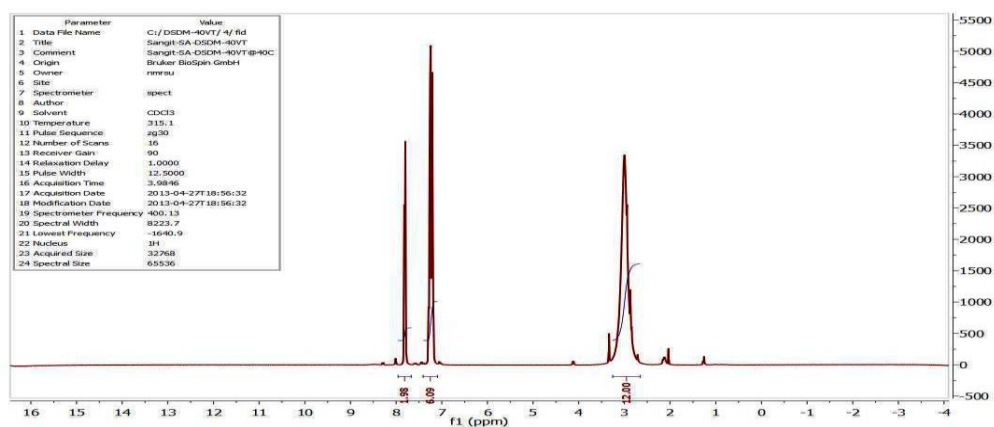

4

Fig S1.  $^1\text{H}$  VT NMR of dimethyl diselenides (**2a**) at  $-20^\circ\text{C}$  (1),  $0^\circ\text{C}$  (2), RT (3),  $40^\circ\text{C}$  (4)

The variable temperature  $^1\text{H}$  NMR was recorded for compound **3c**. At low temperature ( $-40^\circ\text{C}$ ) two isopropyl peaks were separate and appeared as doublet of doublet (1.48 ppm) but as the temperature increases gradually from  $-0^\circ\text{C}$  to  $-20^\circ\text{C}$ ,  $0^\circ\text{C}$ , and finally  $40^\circ\text{C}$  the two isopropyl peaks gradually merge and finally give a single peak (doublet) at room temperature which at  $40^\circ\text{C}$  again shows little splitting of that doublet into doublet of doublet. This shows the that Hg...O non-bonding interaction are present in the complex which lapse at elevated temperature and results in a single peak at  $40^\circ\text{C}$  (Fig. S2).

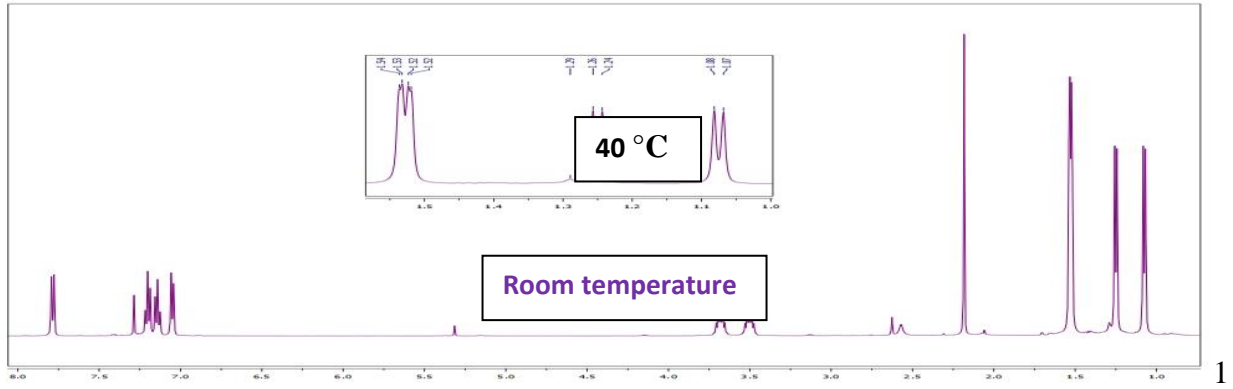

1

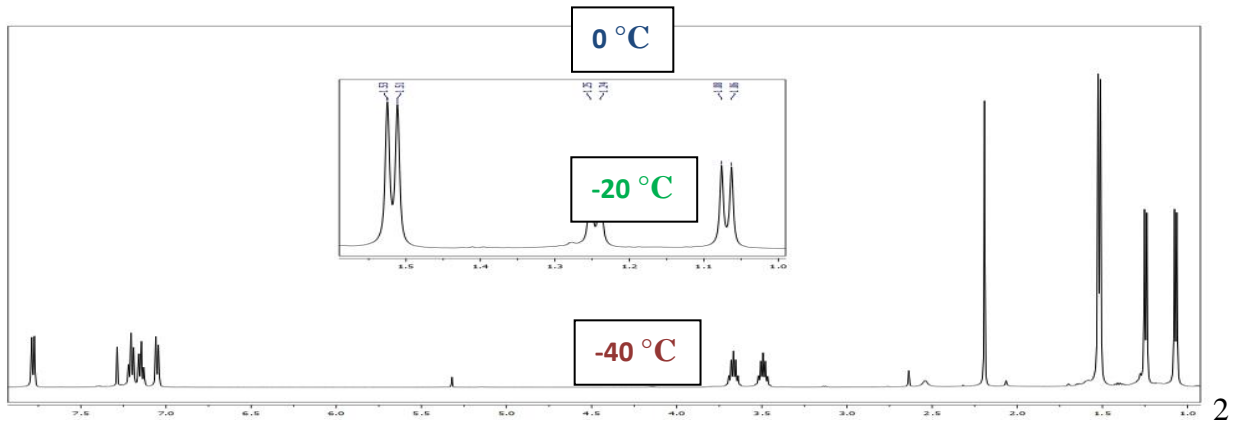

2

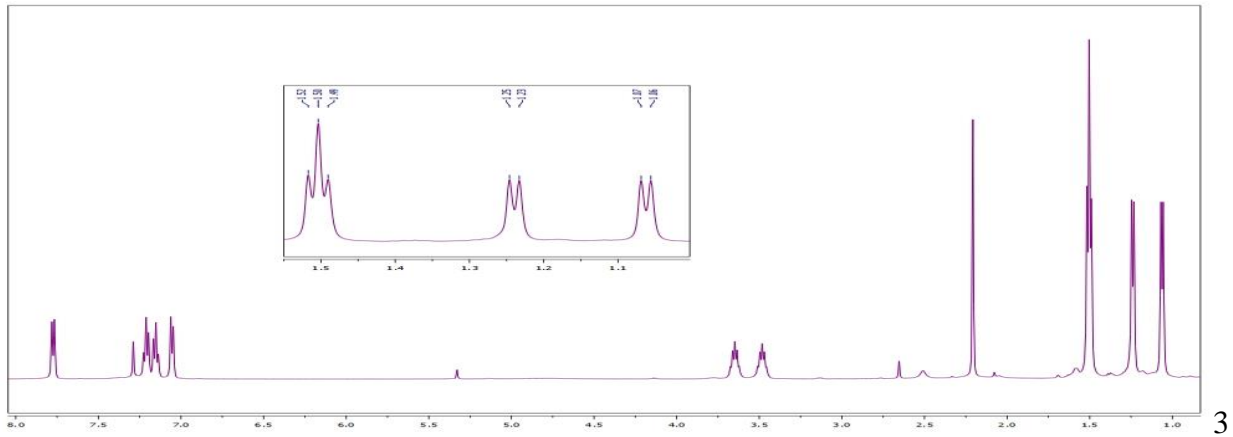

3

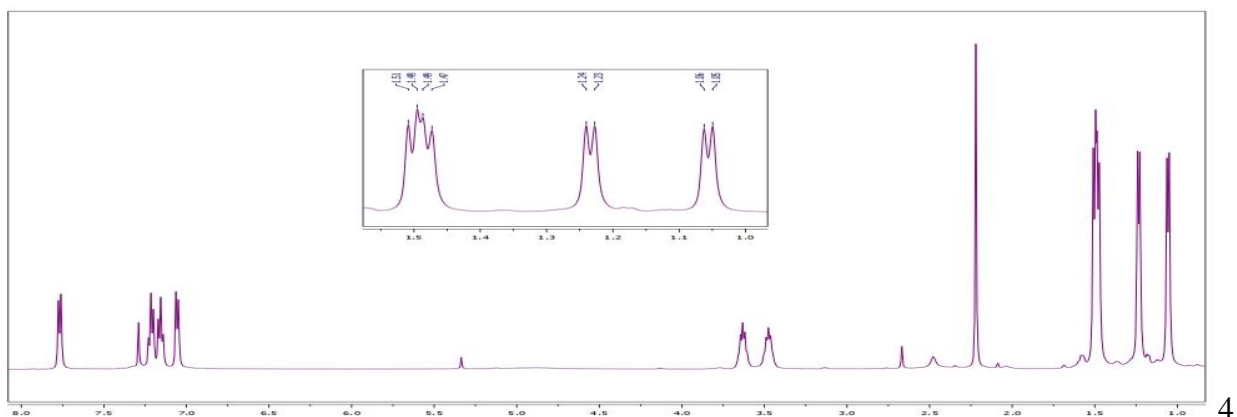

4

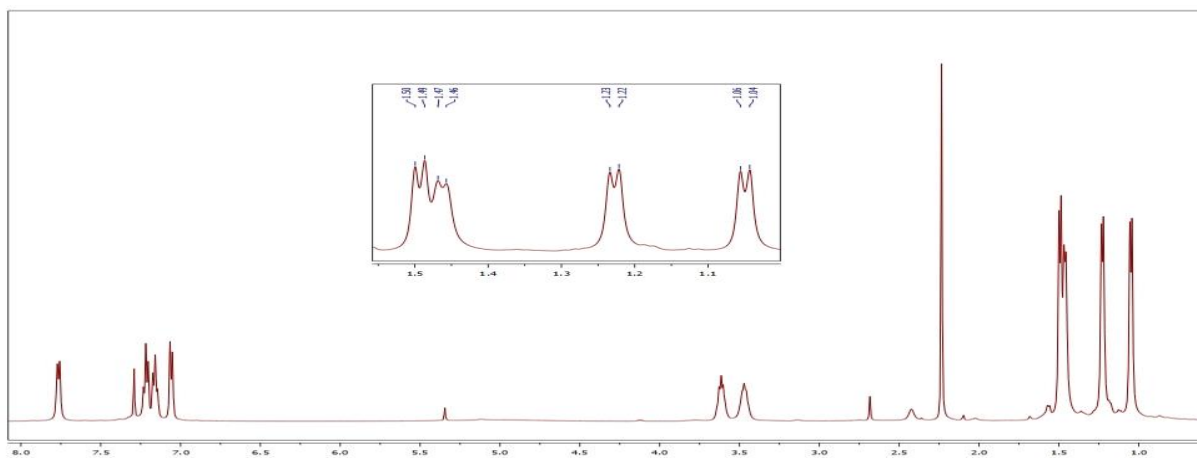

5

Fig S2.  $^1\text{H}$  VT NMR of mercury selenolate **3c** at 40°C (1), RT (2), 0°C (3), RT (4), 40°C (5)

**Thermal Studies.** In order to understand the thermal stability and suitability of mercury selenolate complexes as a single source molecular precursor for the mercury selenides, thermogravimetric analysis (TGA) was carried out from 30–1000 °C at 10 °C/min under  $\text{N}_2$  atmosphere. The mercury selenolate **3a** is thermally stable upto 120°C and then decomposes in two stages. A large reaction interval of 230 °C suggests that this compound decomposes very slowly. DTG shows two peak maxima at 250 °C which corresponds to the 50% weight loss at this temperature and 350°C as the maximum rate of decomposition (Figure S3). In case of both **3a** and **3d**, the first step corresponds to the formation of  $\text{RSeHg}$  (for **3a** weight loss found 38.5%, calculated for  $\text{RSeHg}$  34.69% and for **3d** weight loss found 35.3%, calculated for  $\text{RSeHg}$  36.96%). The second step for **3a** involves complete decomposition and vaporization of  $\text{RSeHg}$  leaving empty pan behind. This suggests formation of volatile selenium containing intermediates

during the decomposition process. In contrast, second step in the TG curve of **3d** (weight loss found 88.79%, calculated for the Se 89.73%) leads to the formation of selenium residue (Figure S6). Similarly, mercury complexes **3c**, **3d**, and **3e** also underwent two-step decomposition each *via* a different pathway whereas mercury selenolate complex **3b** found to be highly unstable beyond 350 °C and decomposes in to selenium residue in single step (Figure S4).

The complex **3c** also shows two step decomposition but in a different way. Complex **3c** is stable up to 200 °C, then the first decomposition step occur and belongs to the formation of SeHg (for **3c** weight loss found 68.5%, calculated for HgSe 63.1%). The second step decomposition for the complex **3c** results in the formation of selenium residue (for **3c** weight loss found 12.0%, calculated for Selenium 10.2%) Figure S5.

The complex **3e** underwent two-step decomposition (Figure S7). The first step is found to be sluggish till ~ 515 °C, a characteristic for the loss of one ligand forming RSeHg (weight loss found 31.9%, calculated weight loss 37.48%). The second step of decomposition corresponds to the loss of organic moiety with the formation of HgSe as inferred from the weight loss (weight loss found 70%, calculated for HgSe 65.1%).

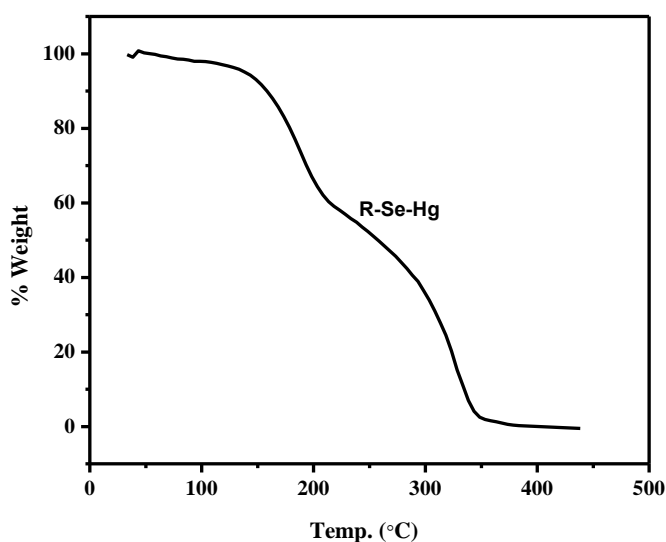

**Figure S3.** TG curve of **3a**

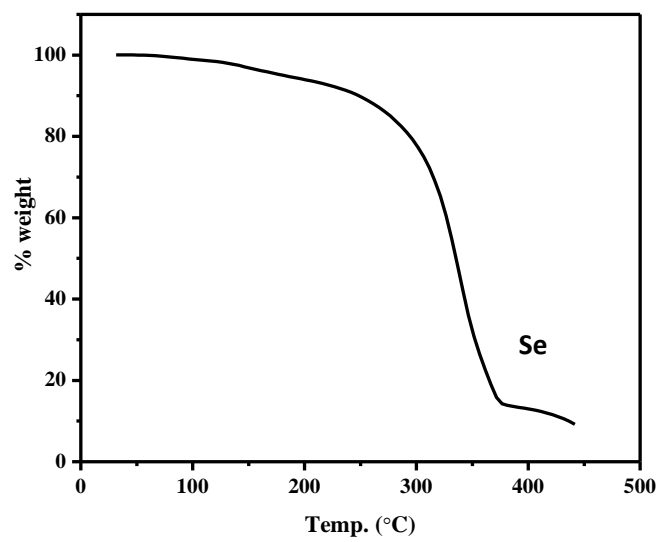

**Figure S4.** TG curve of **3b**

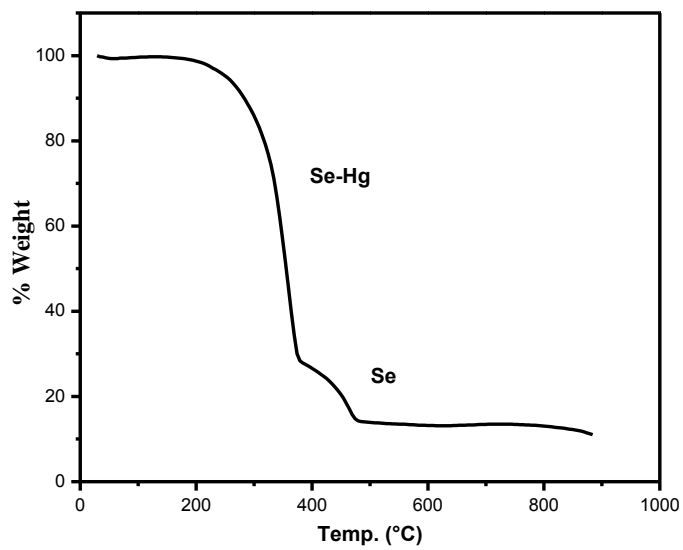

**Figure S5.** TG curve of **3c**



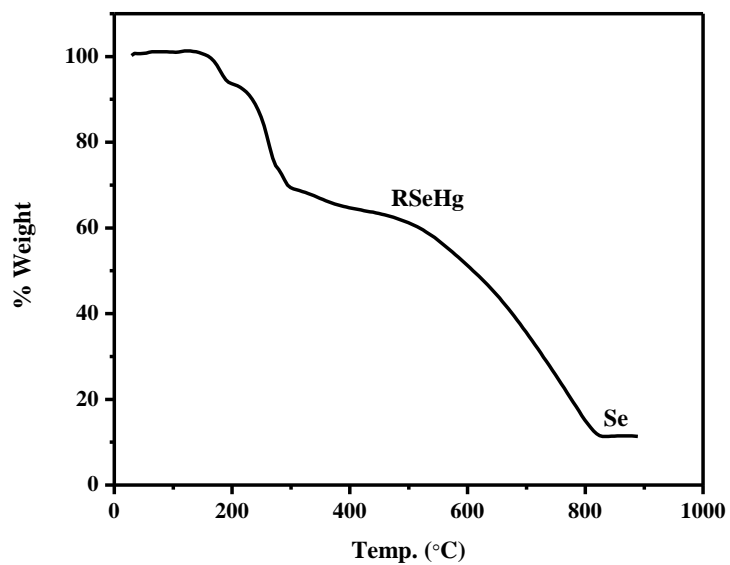

**Figure S6.** TG curve of **3d**

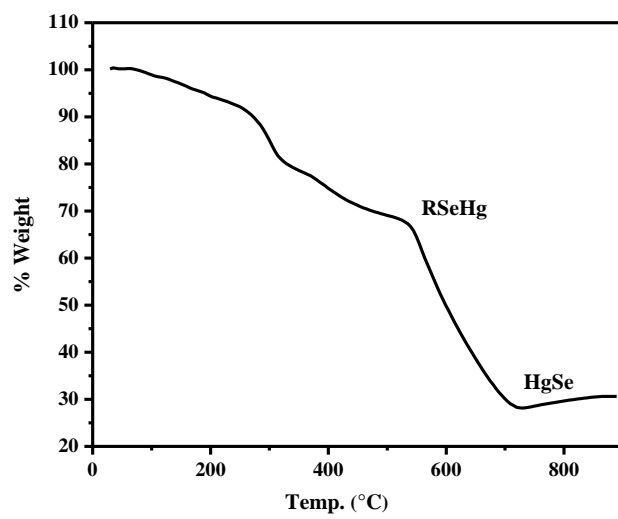

**Figure S7.** TG curve of **3e**

Figure S8 <sup>1</sup>H NMR spectrum of **2a**

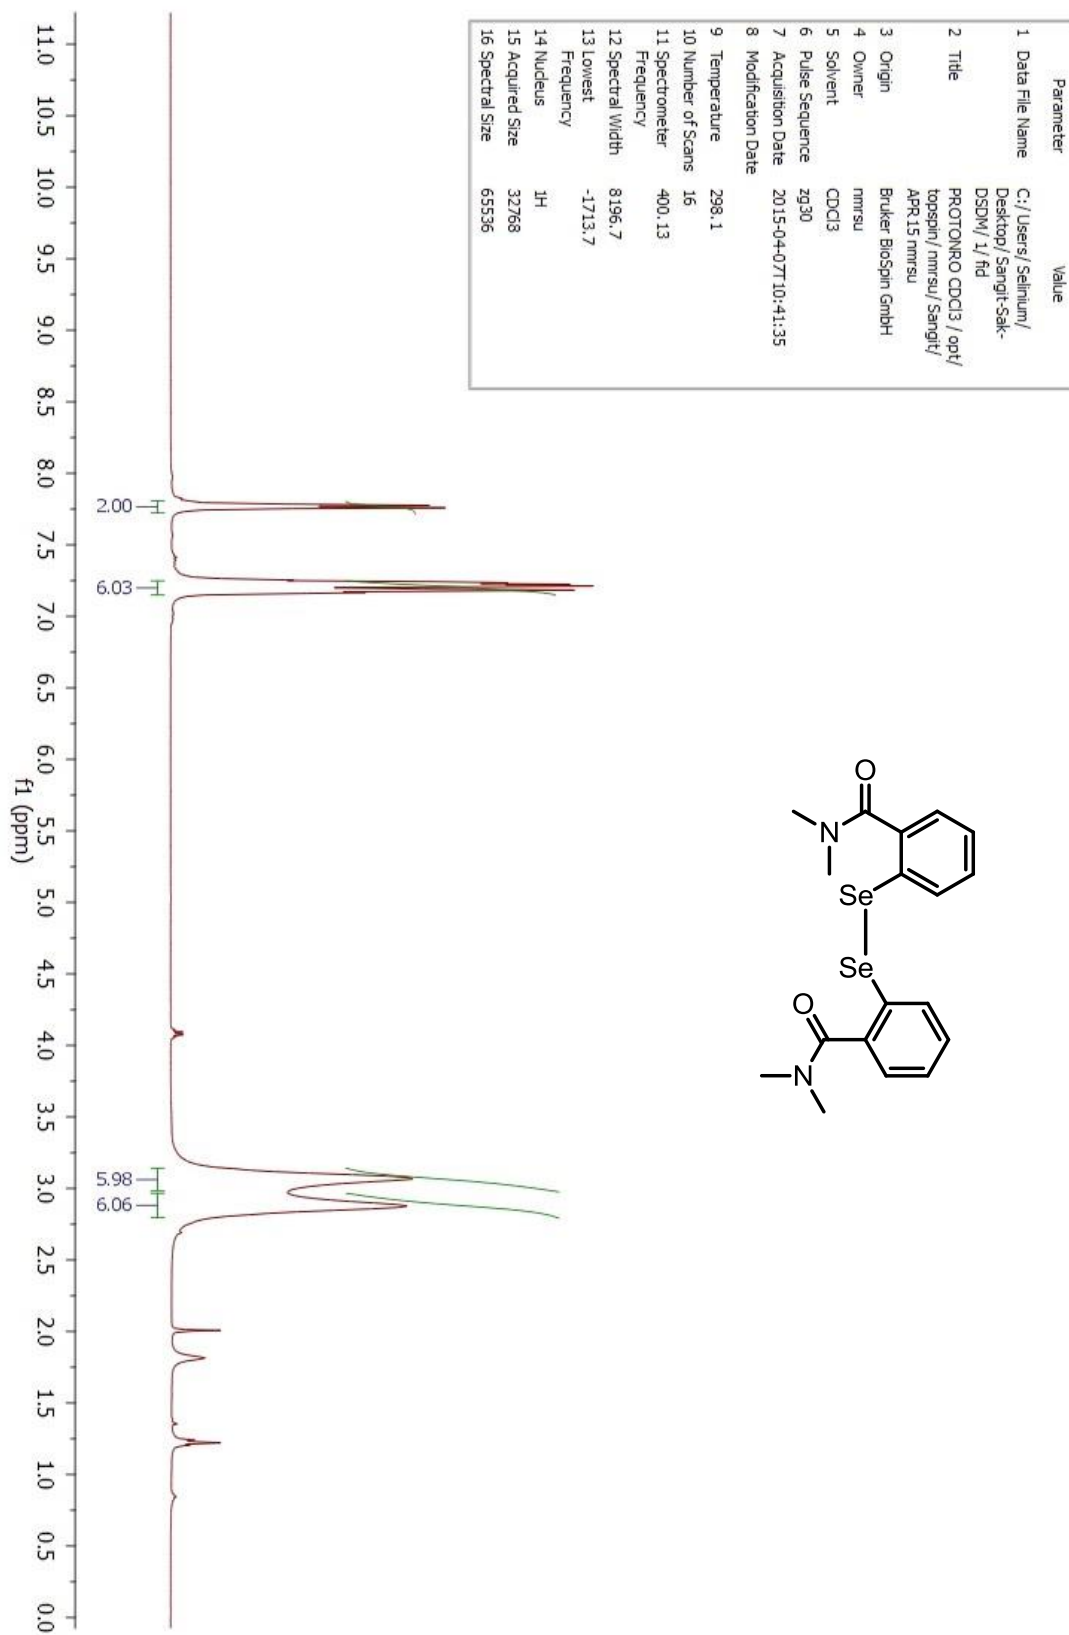

Figure S9 <sup>13</sup>C NMR spectrum of **2a**

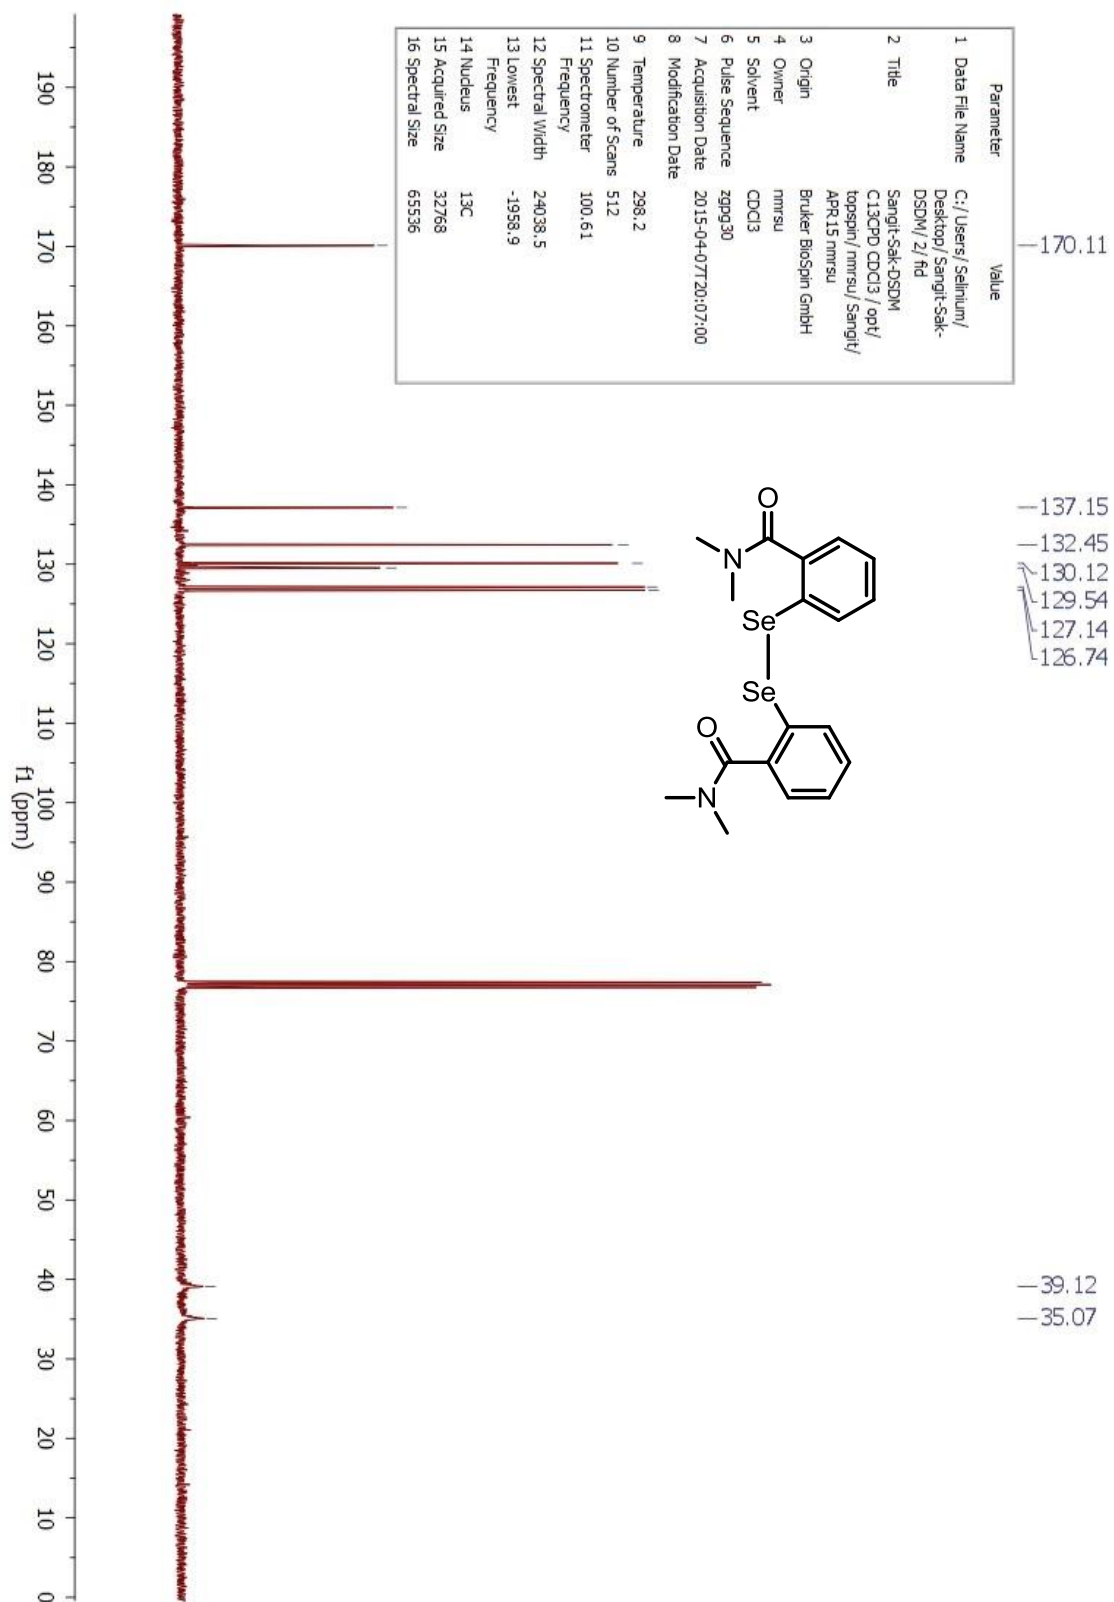

Figure S10 <sup>77</sup>Se NMR spectrum of **2a**

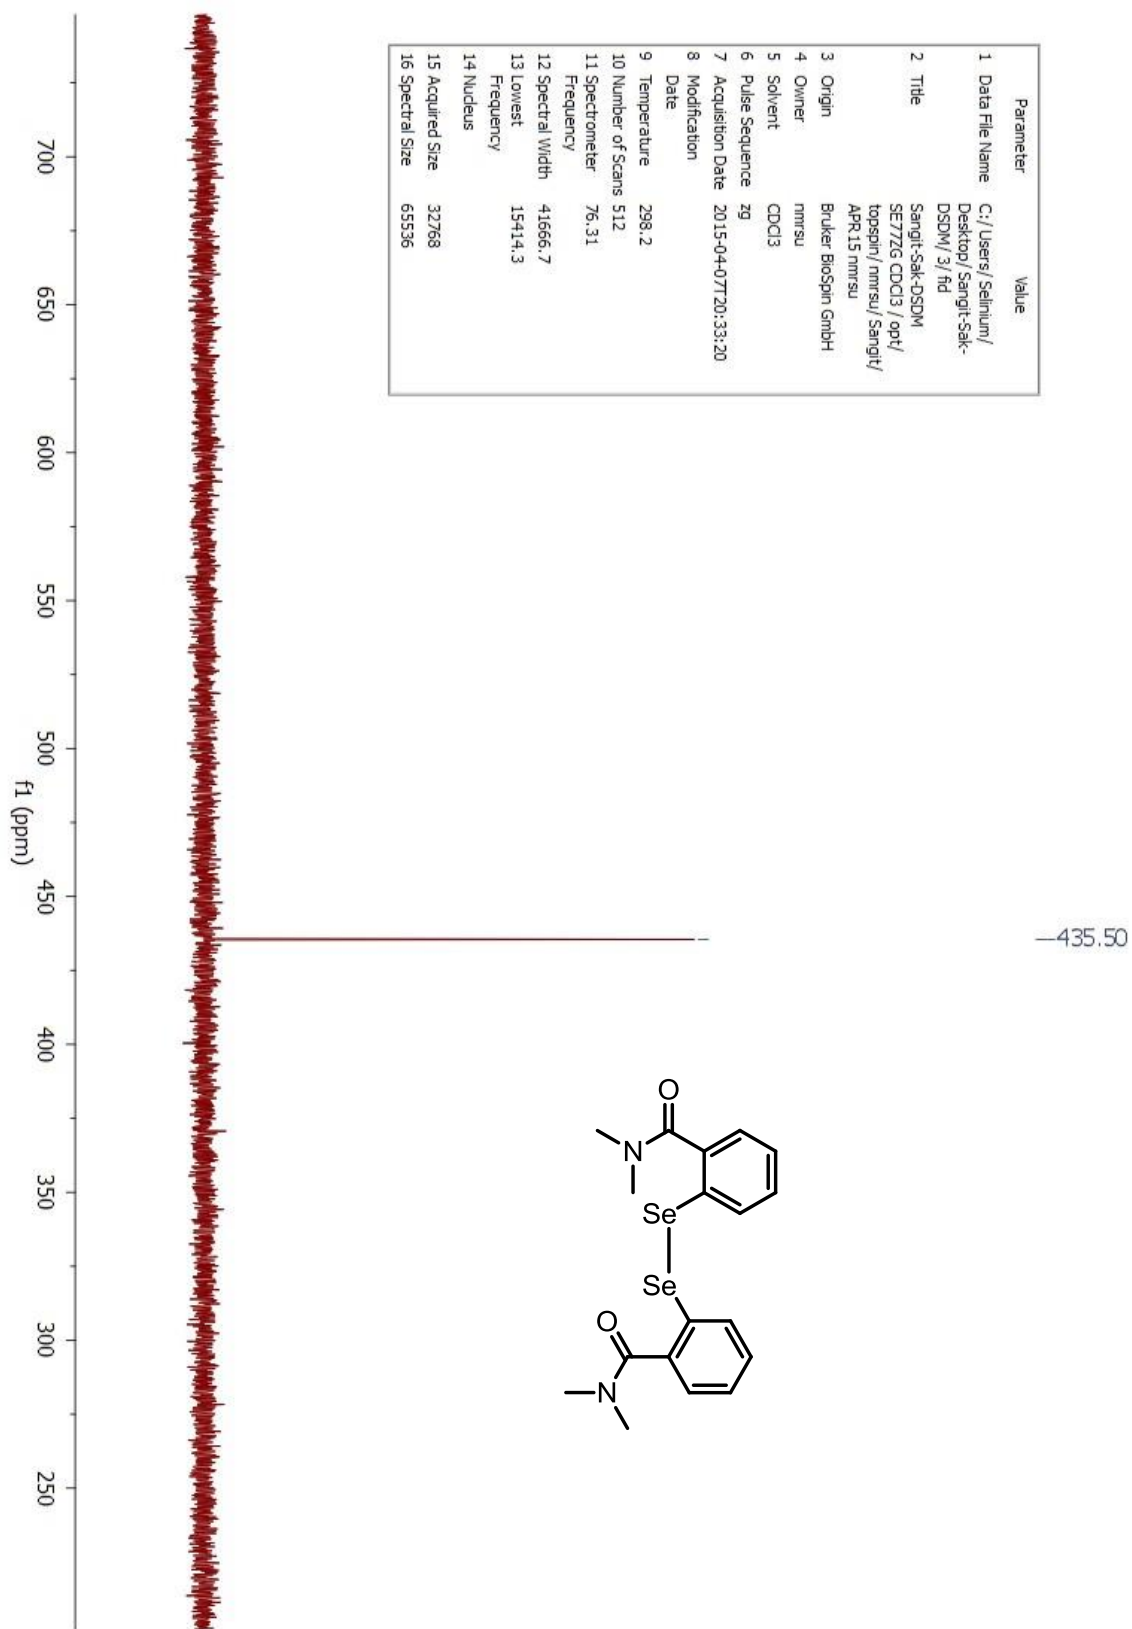

Figure S11 Mass spectrum of **2a**

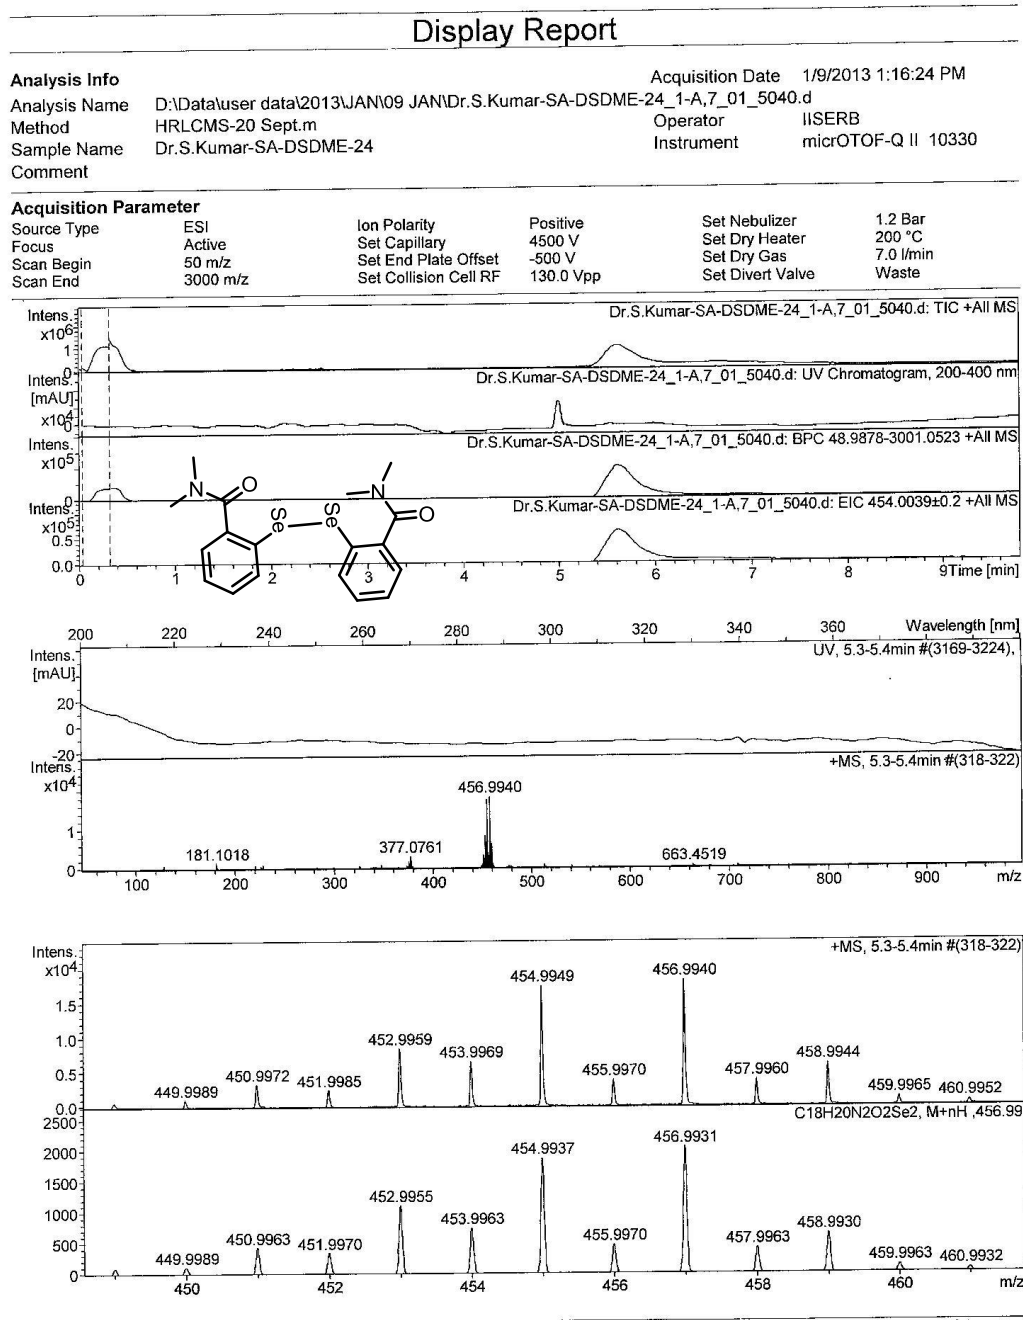

Bruker Compass DataAnalysis 4.0

printed: 2/20/2013 12:19:57 PM

Page 1 of 1

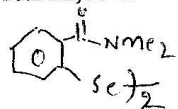

m.wt = 456.99

C<sub>18</sub>H<sub>20</sub>N<sub>2</sub>O<sub>2</sub>Se<sub>2</sub>

Figure S12 <sup>1</sup>H NMR spectrum of **3a**

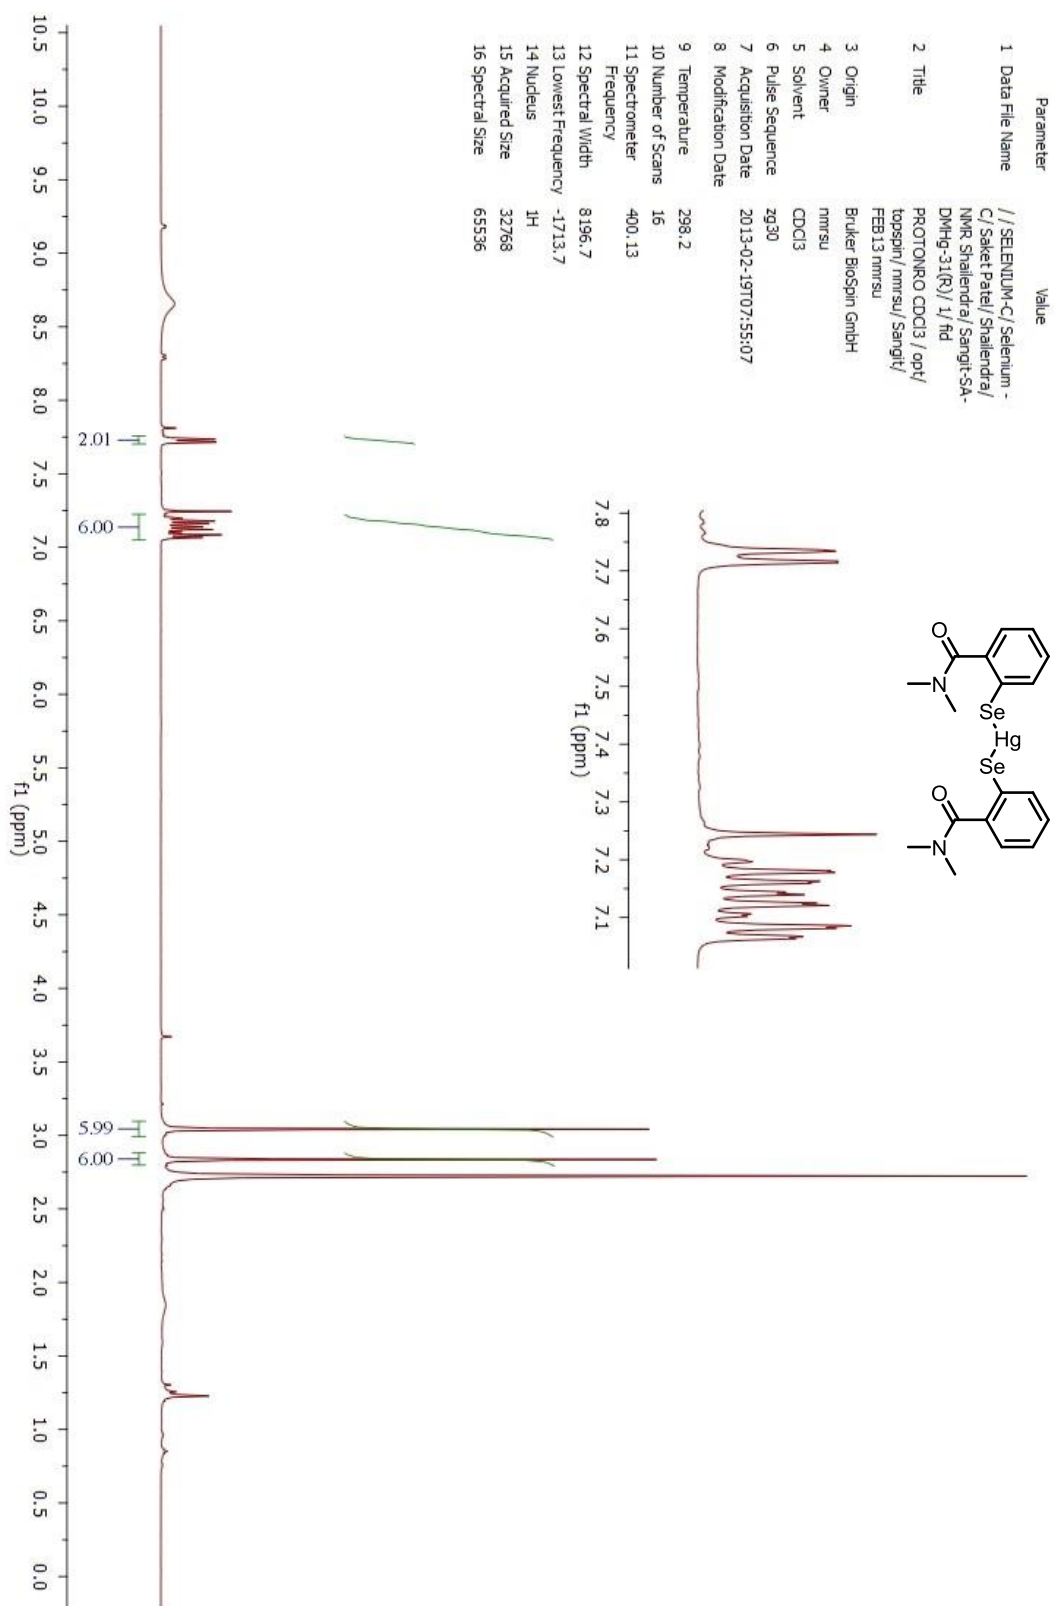

Figure S13 <sup>13</sup>C NMR spectrum of **3a**

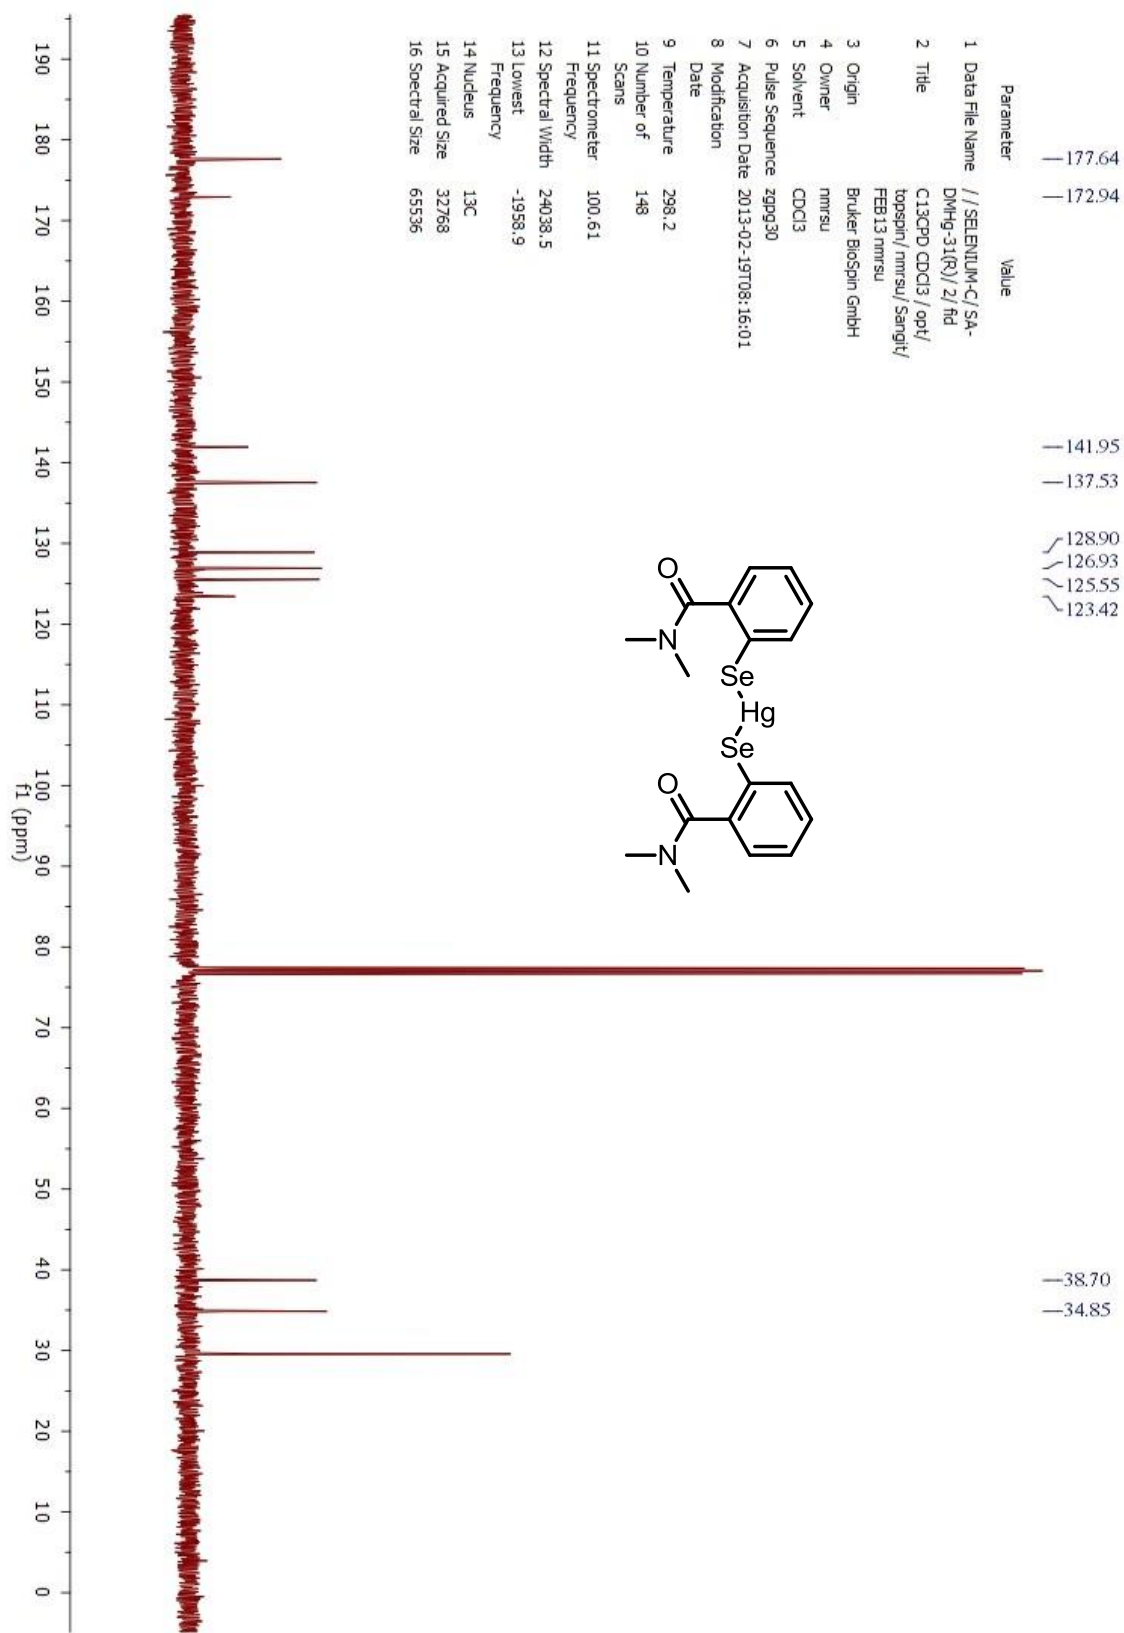

Figure S14  $^{77}\text{Se}$  NMR spectrum of **3a**

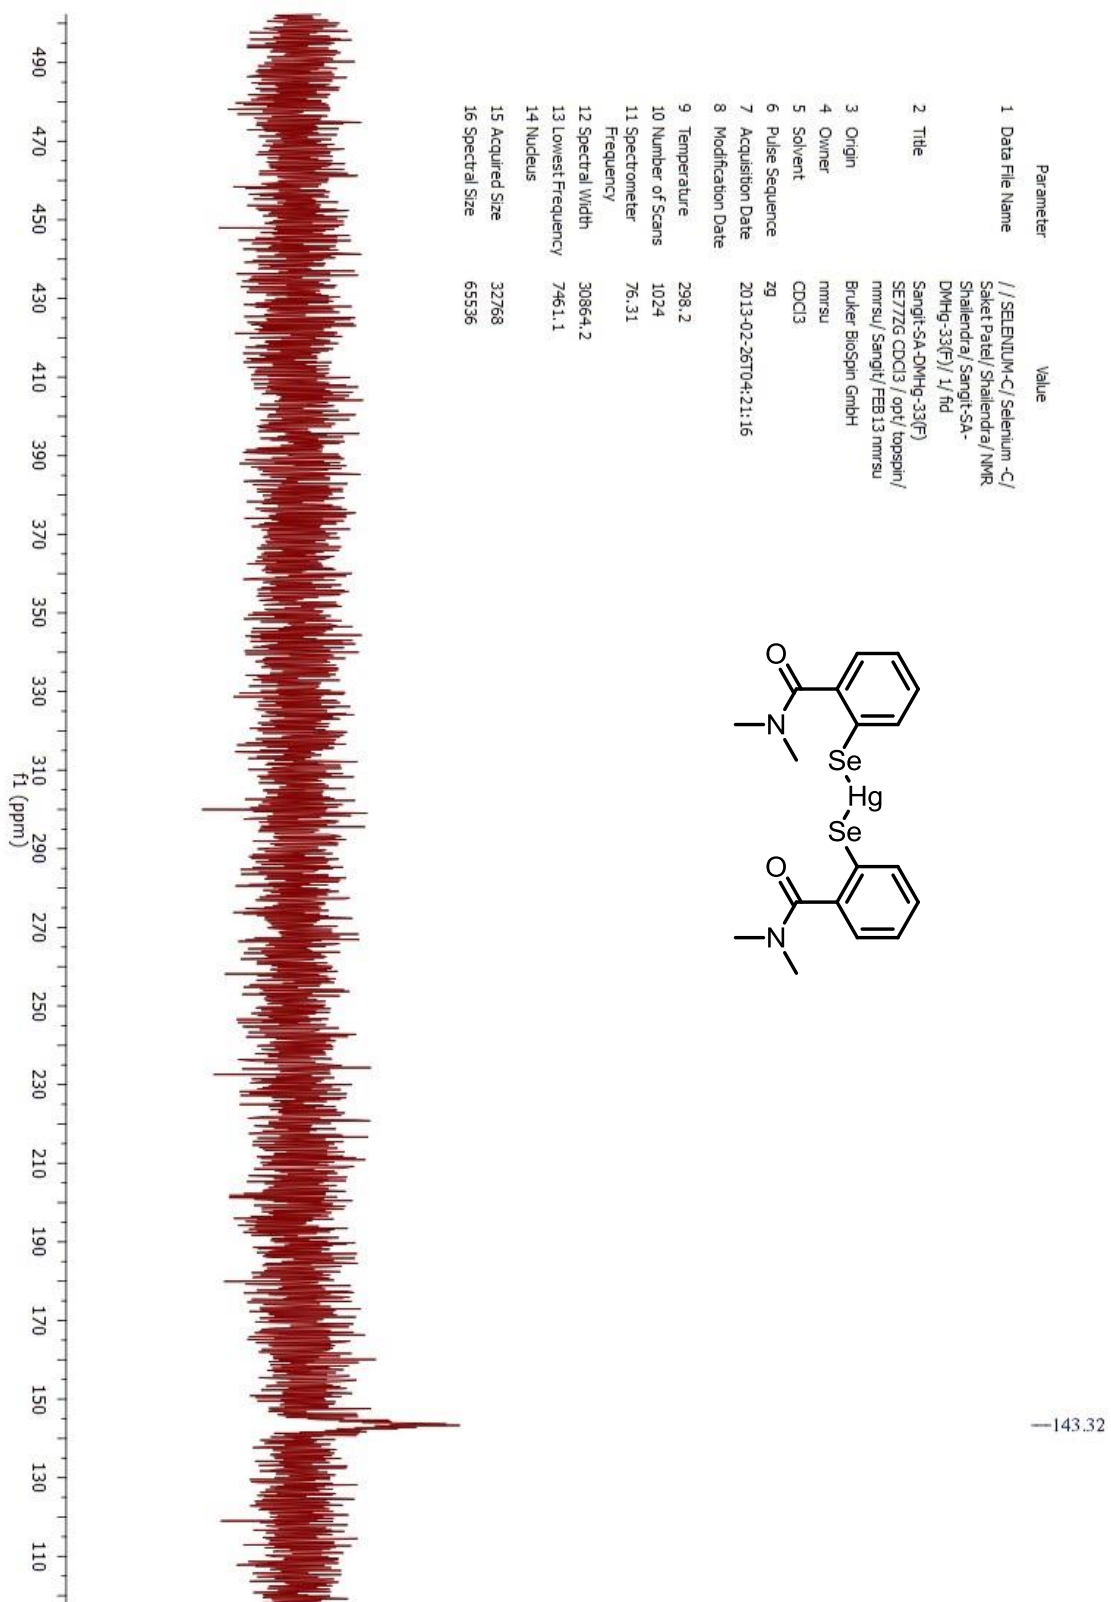



Figure S15 Mass spectrum of **3a**

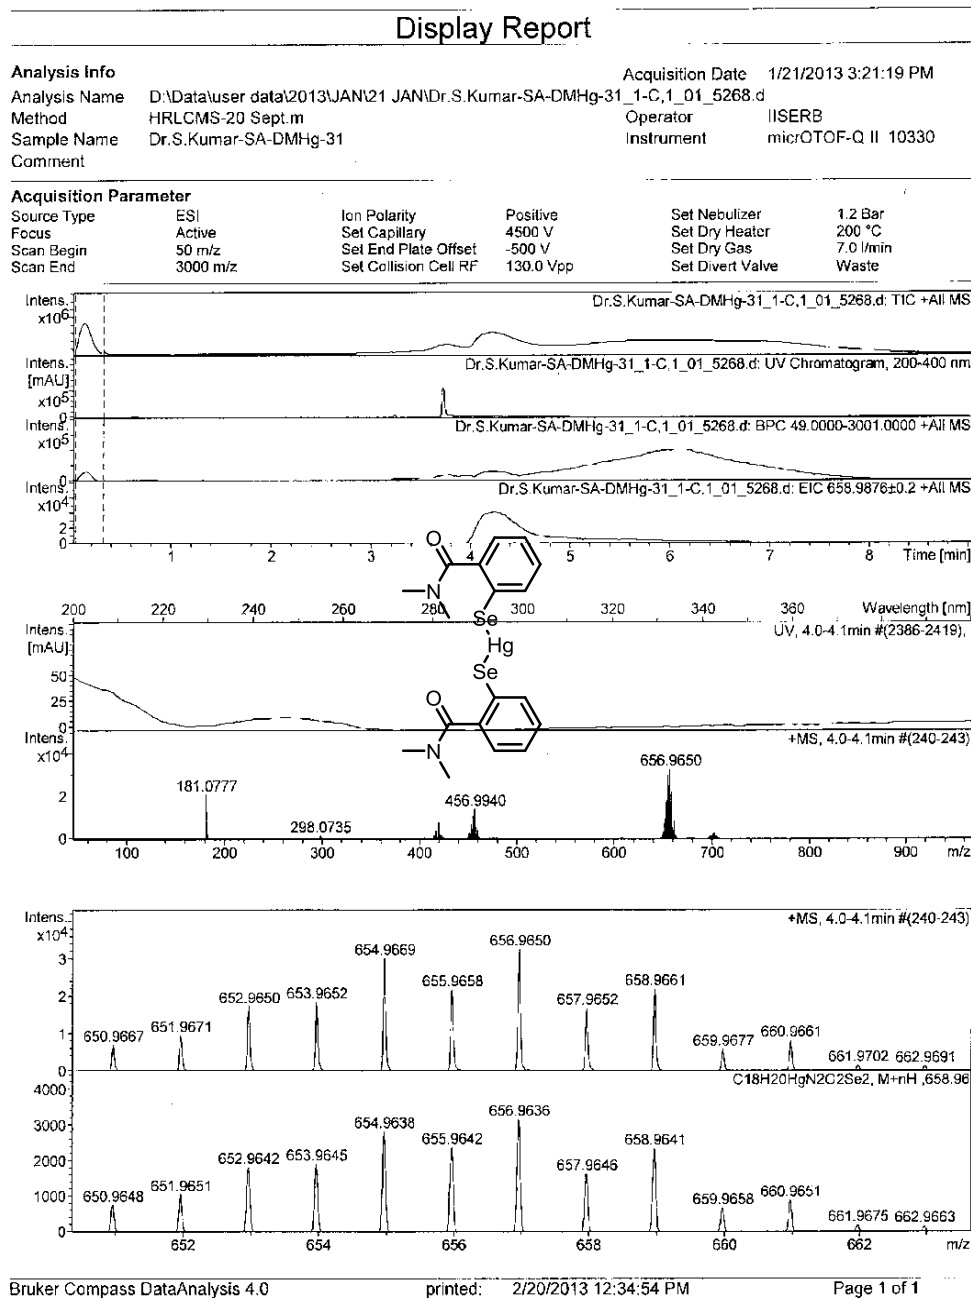

Bruker Compass DataAnalysis 4.0

printed: 2/20/2013 12:34:54 PM

Page 1 of 1

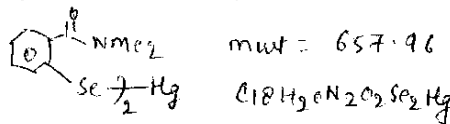

Figure S16 <sup>1</sup>H NMR spectrum of **2b**

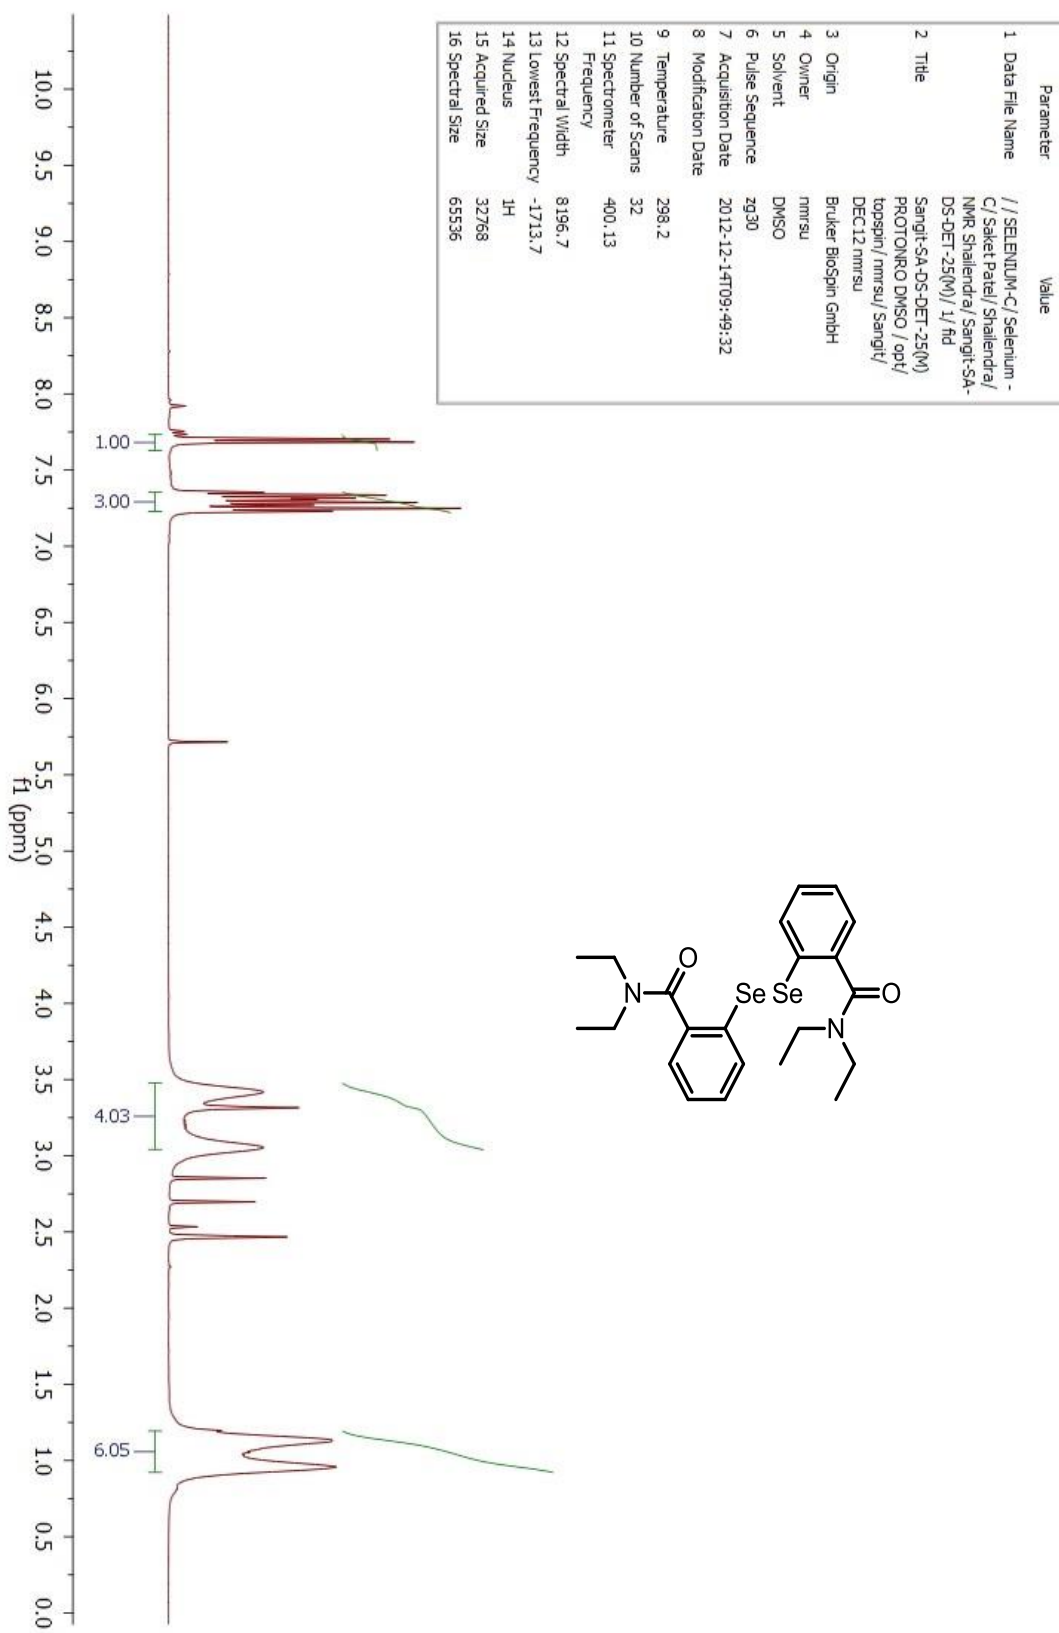

Figure S17  $^{13}\text{C}$  NMR spectrum of **2b**

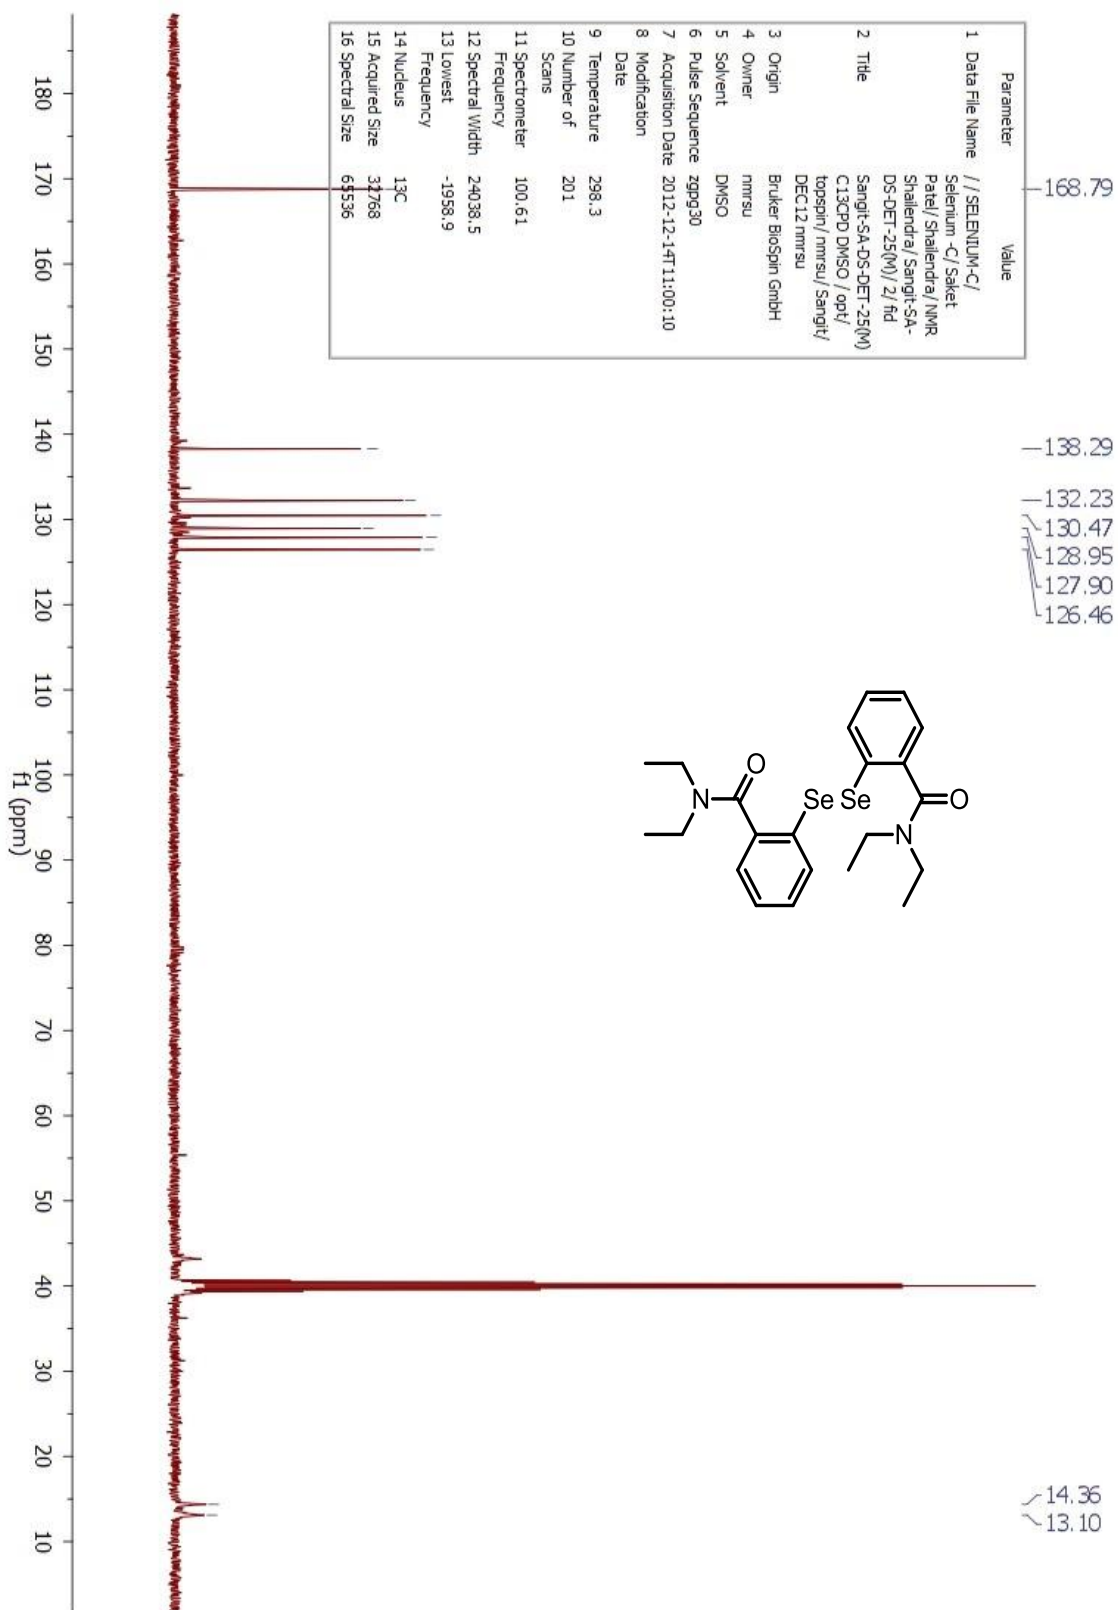

Figure S18  $^{77}\text{Se}$  NMR spectrum of **2b**

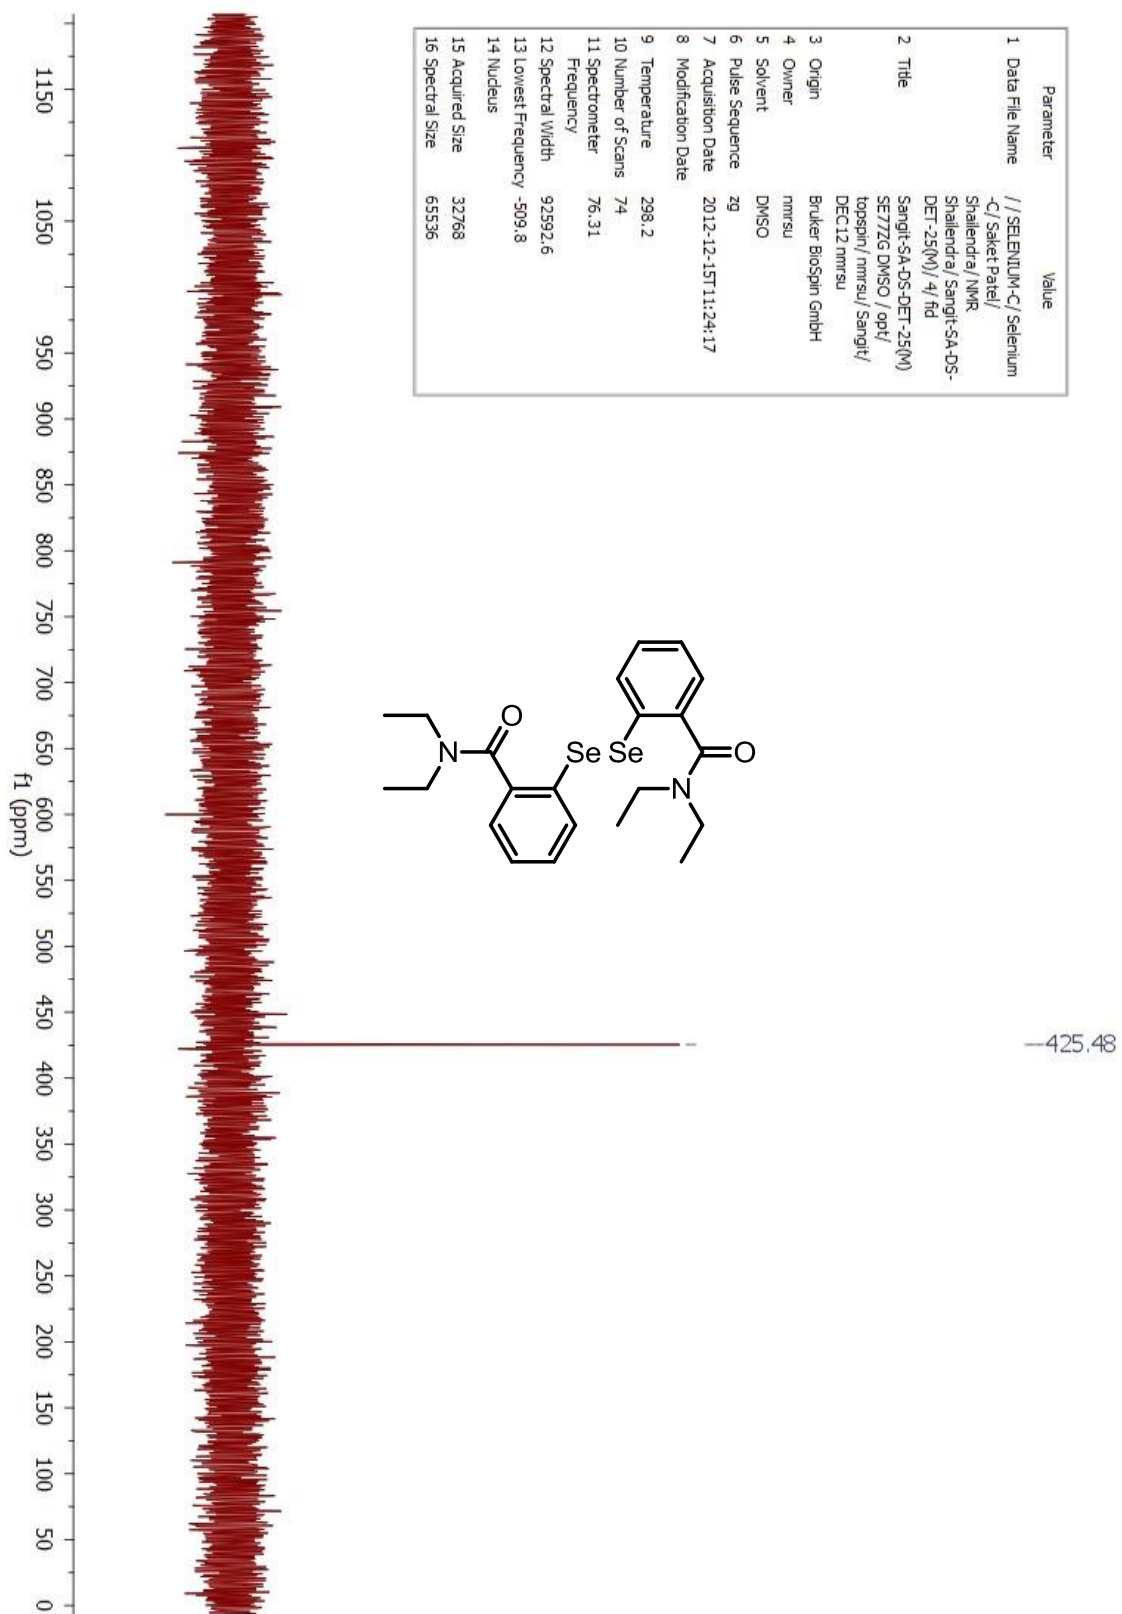

Figure S19 Mass spectrum of **2b**

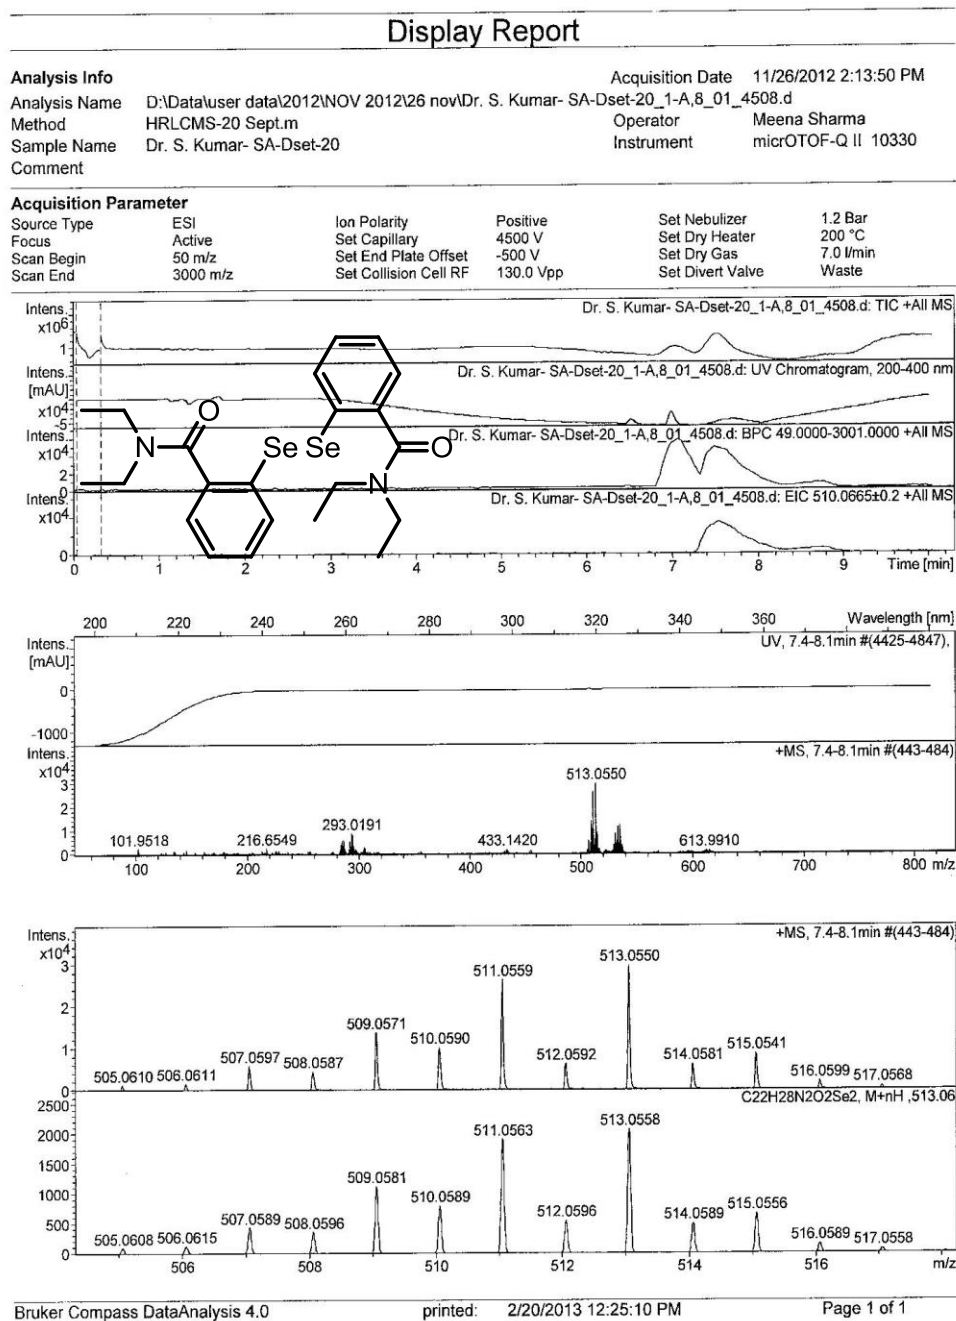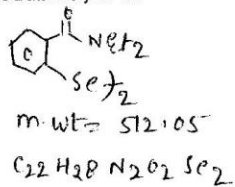

Figure S20 <sup>1</sup>H NMR spectrum of **3b**

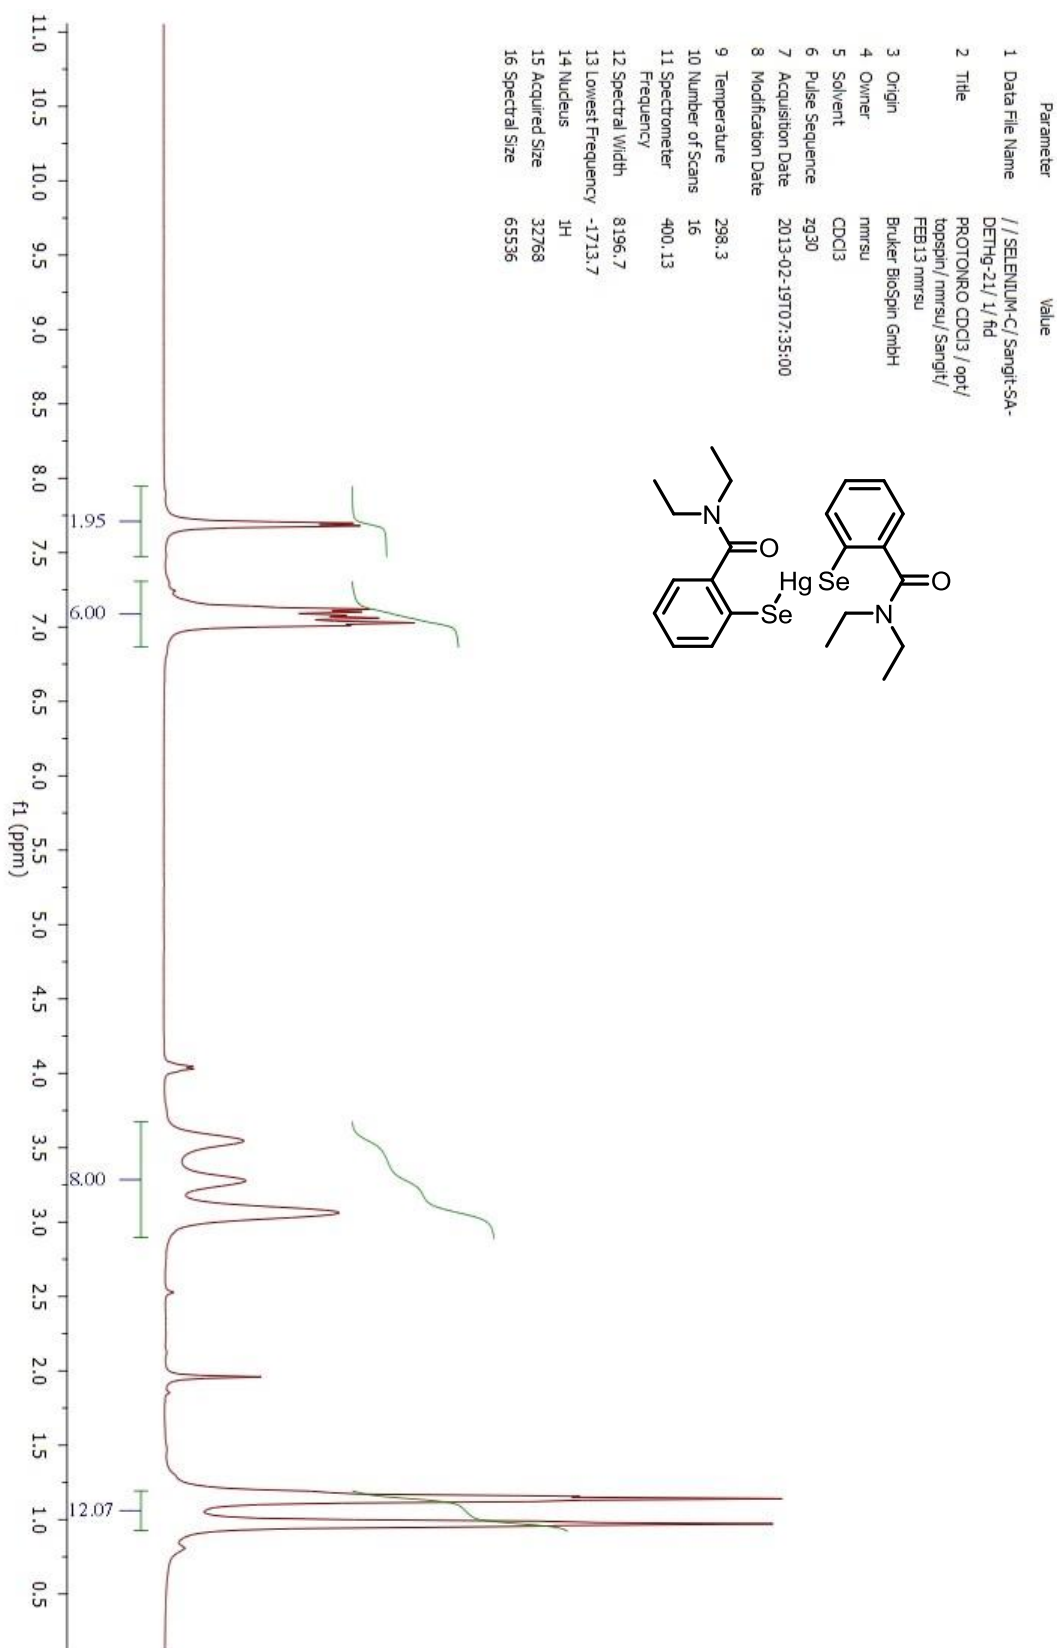

Figure S21  $^{13}\text{C}$  NMR spectrum of **3b**

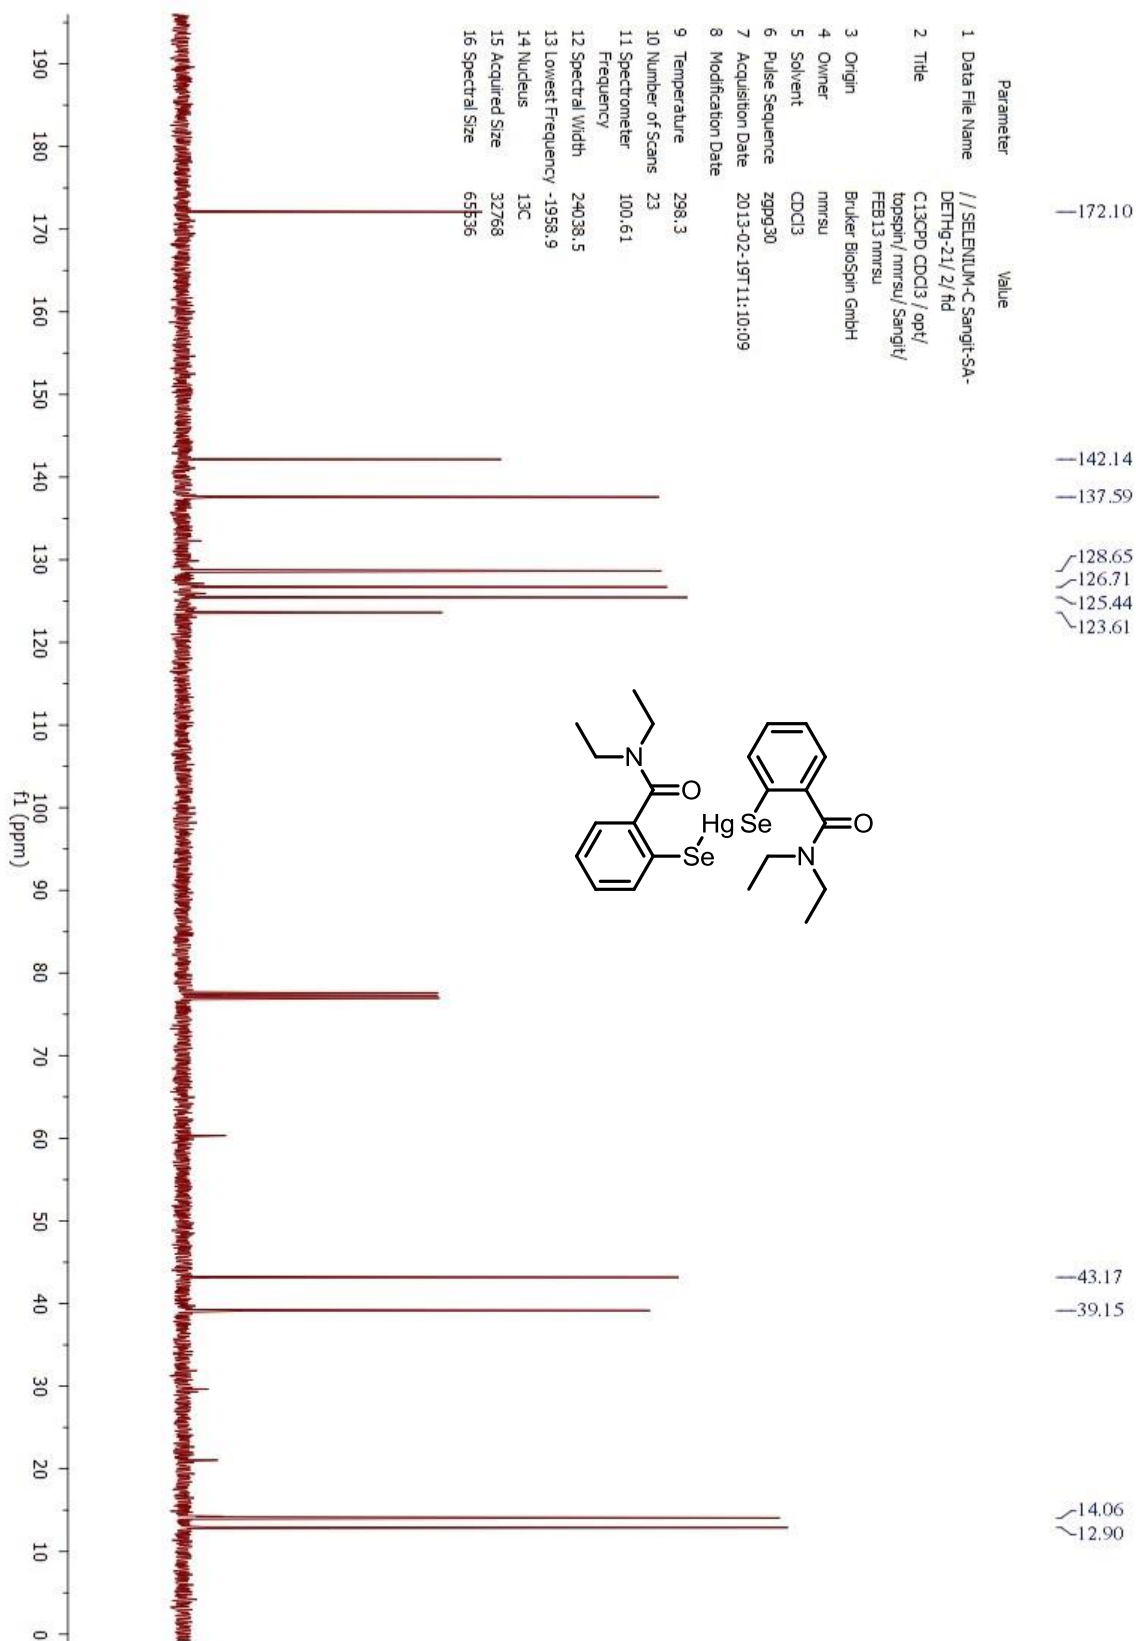

Figure S22  $^{77}\text{Se}$  NMR spectrum of **3b**

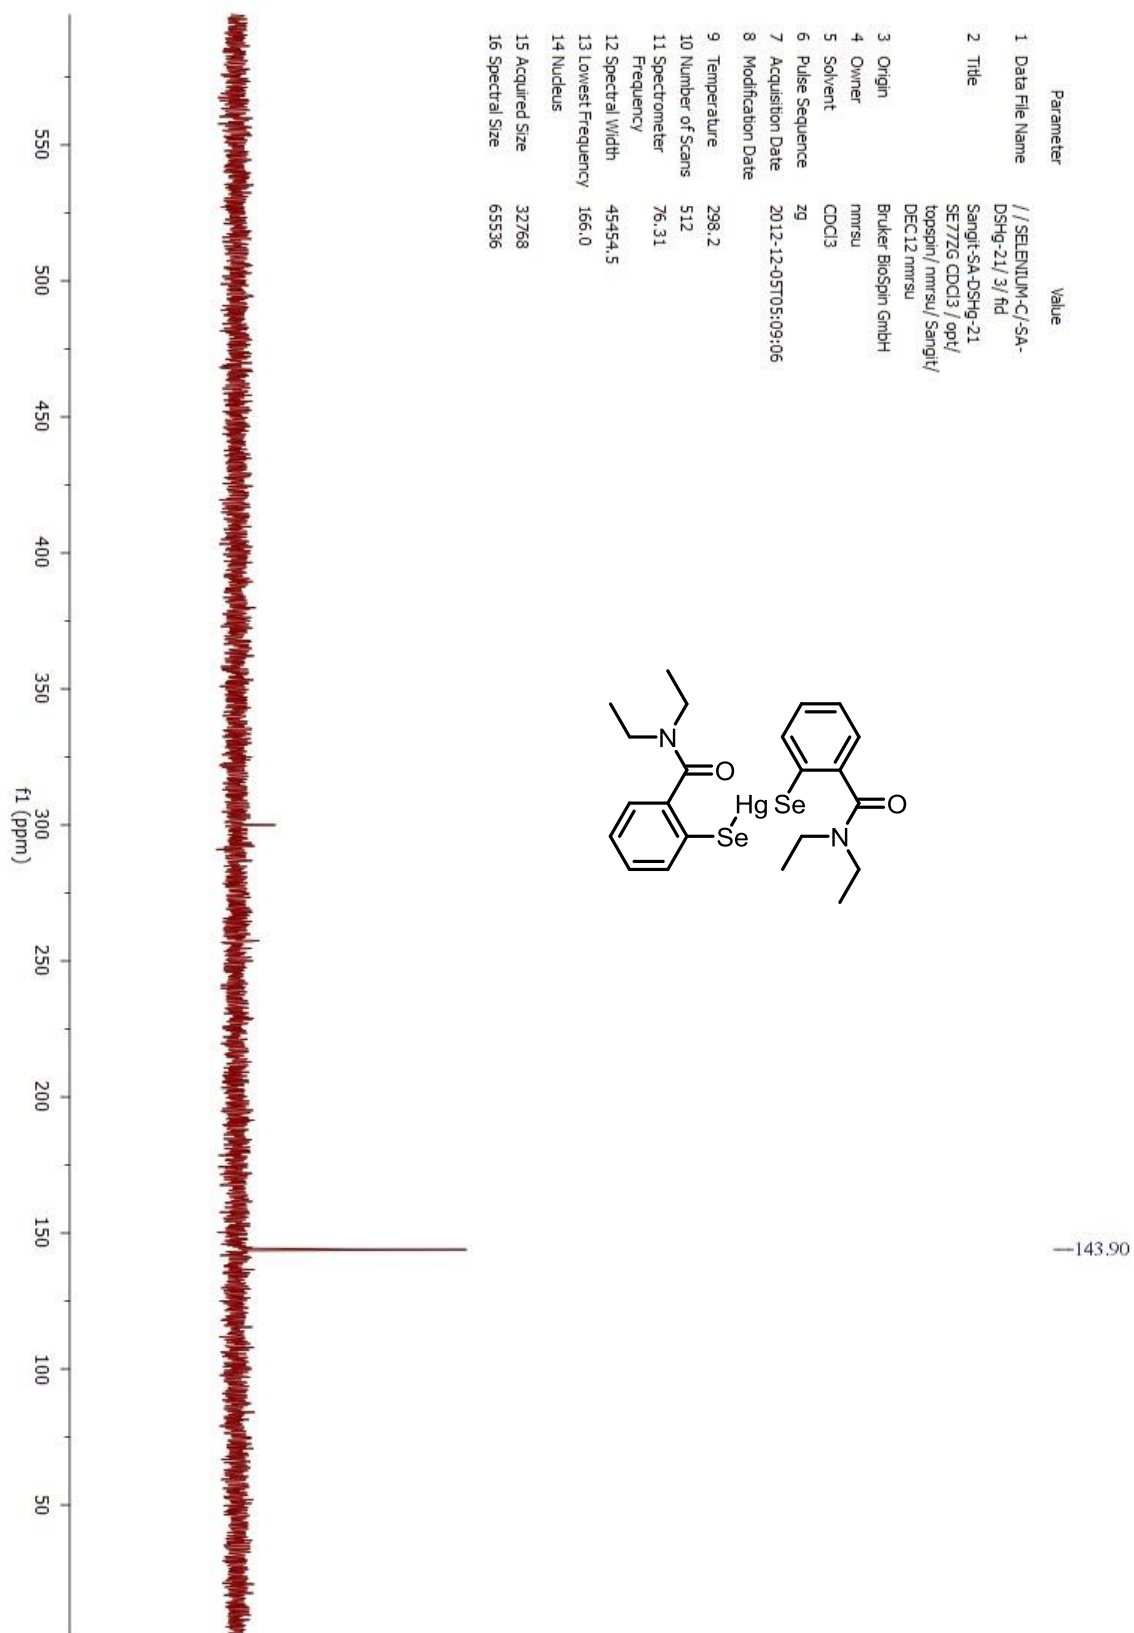



Figure S23 Mass spectrum of **3b**

**Display Report**

---

|                      |                                                                   |                  |                      |
|----------------------|-------------------------------------------------------------------|------------------|----------------------|
| <b>Analysis Info</b> |                                                                   | Acquisition Date | 12/5/2012 2:59:21 PM |
| Analysis Name        | D:\Data\user data\2012\DEC 2012\04 DEC\Dr. S. Kumar- SA-DSHg-21.d | Operator         | Meena Sharma         |
| Method               | tune_low.m                                                        | Instrument       | micrOTOF-Q II 10330  |
| Sample Name          | SA-DSHg-21                                                        |                  |                      |
| Comment              |                                                                   |                  |                      |

|                              |            |                       |           |
|------------------------------|------------|-----------------------|-----------|
| <b>Acquisition Parameter</b> |            |                       |           |
| Source Type                  | ESI        | Ion Polarity          | Positive  |
| Focus                        | Not active | Set Capillary         | 4600 V    |
| Scan Begin                   | 50 m/z     | Set End Plate Offset  | -500 V    |
| Scan End                     | 3000 m/z   | Set Collision Cell RF | 130.0 Vpp |
|                              |            | Set Nebulizer         | 0.4 Bar   |
|                              |            | Set Dry Heater        | 180 °C    |
|                              |            | Set Dry Gas           | 4.0 l/min |
|                              |            | Set Divert Valve      | Waste     |

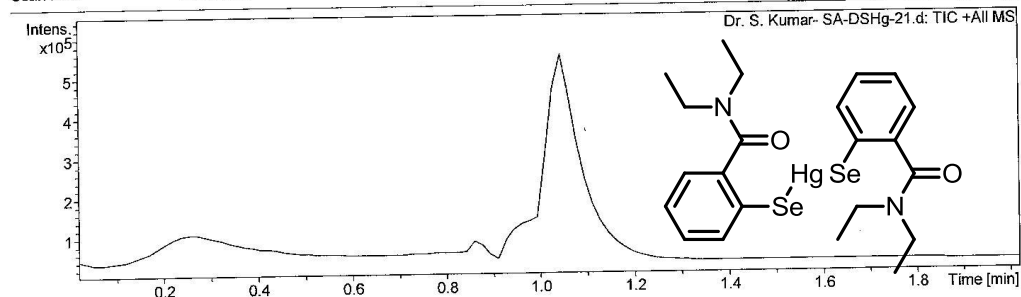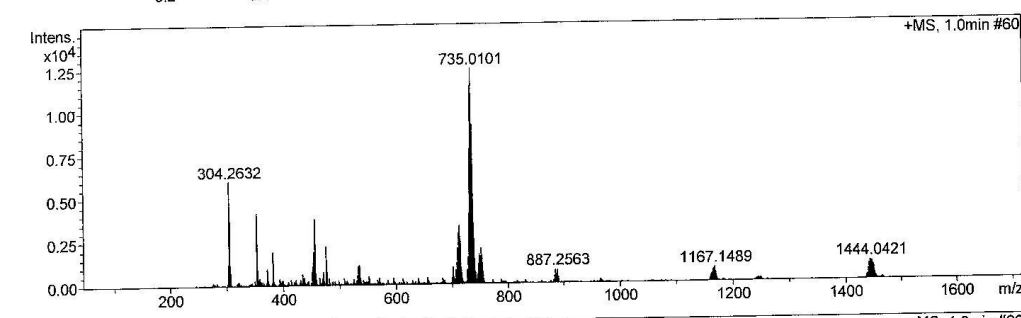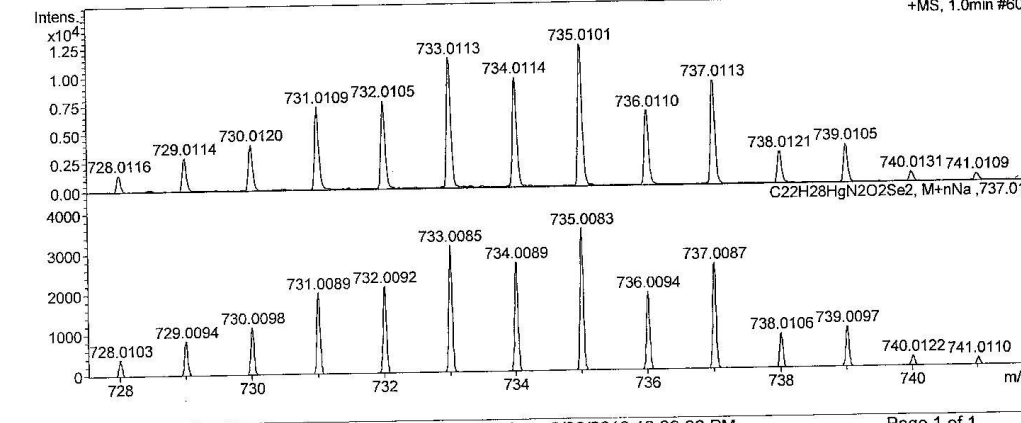

Bruker Compass DataAnalysis 4.0      printed: 2/20/2013 12:29:06 PM      Page 1 of 1

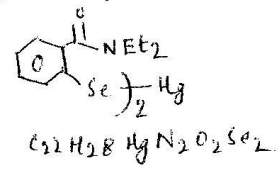

Figure S24 <sup>1</sup>H NMR spectrum of **2c**

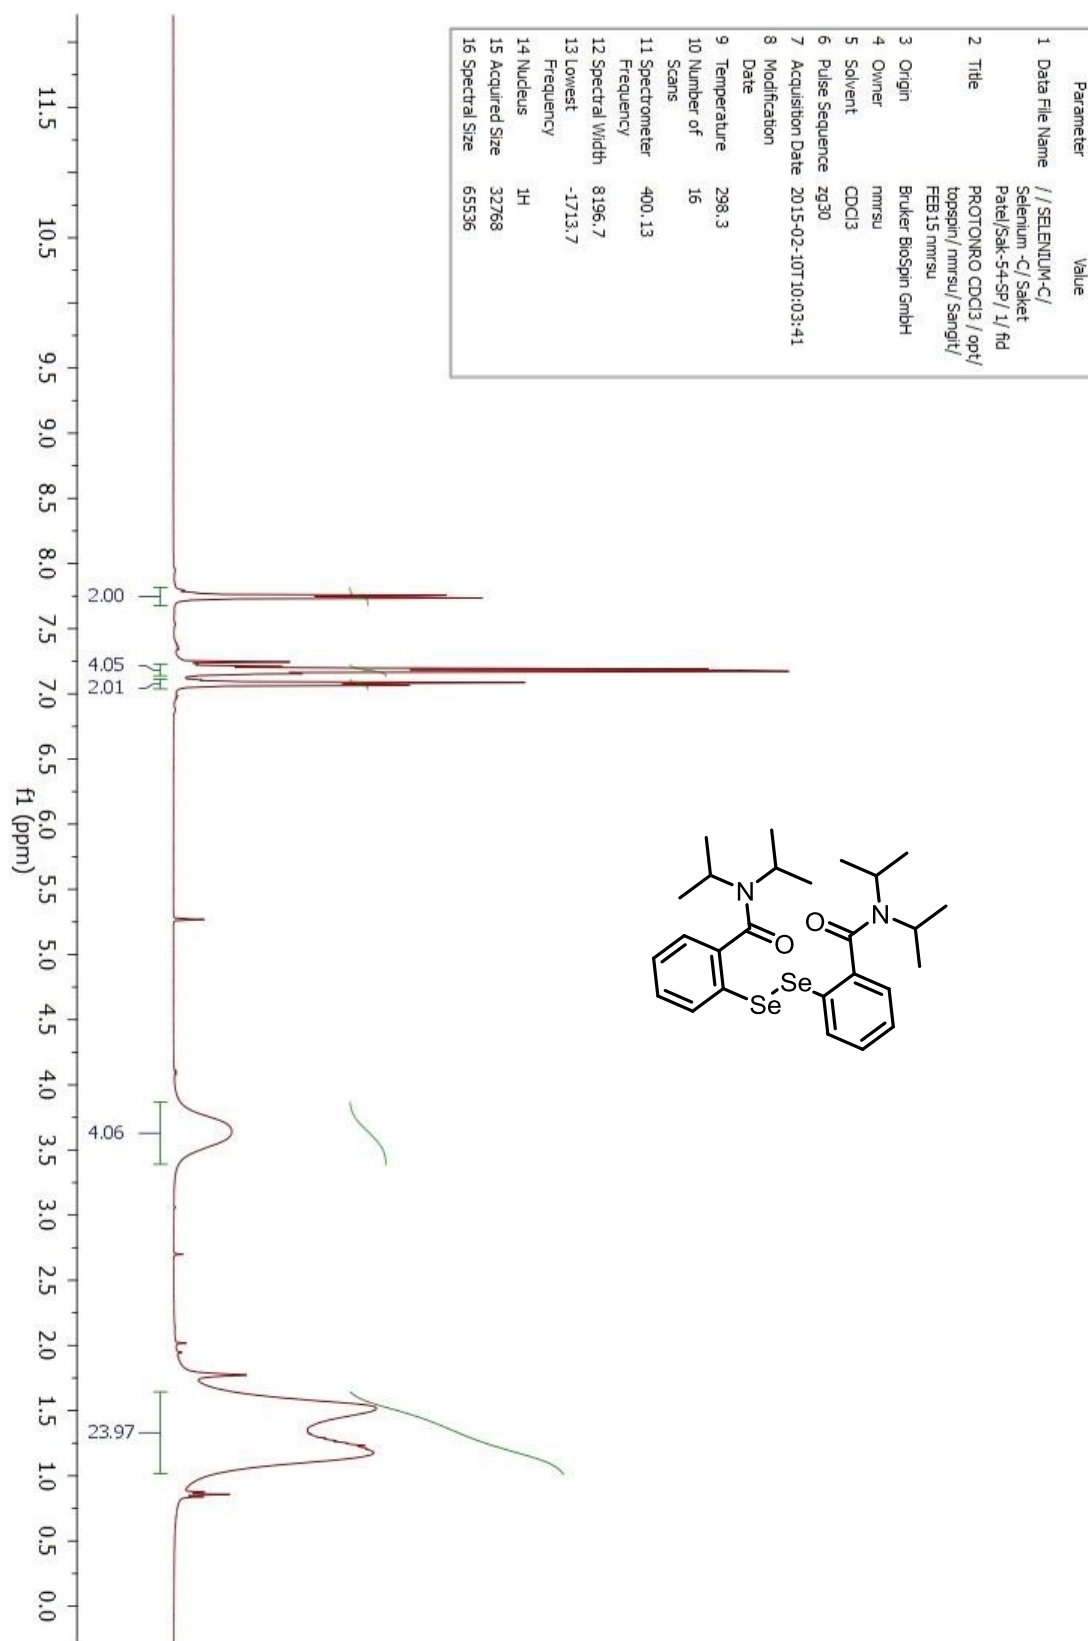

Figure S25  $^{13}\text{C}$  NMR spectrum of **2c**

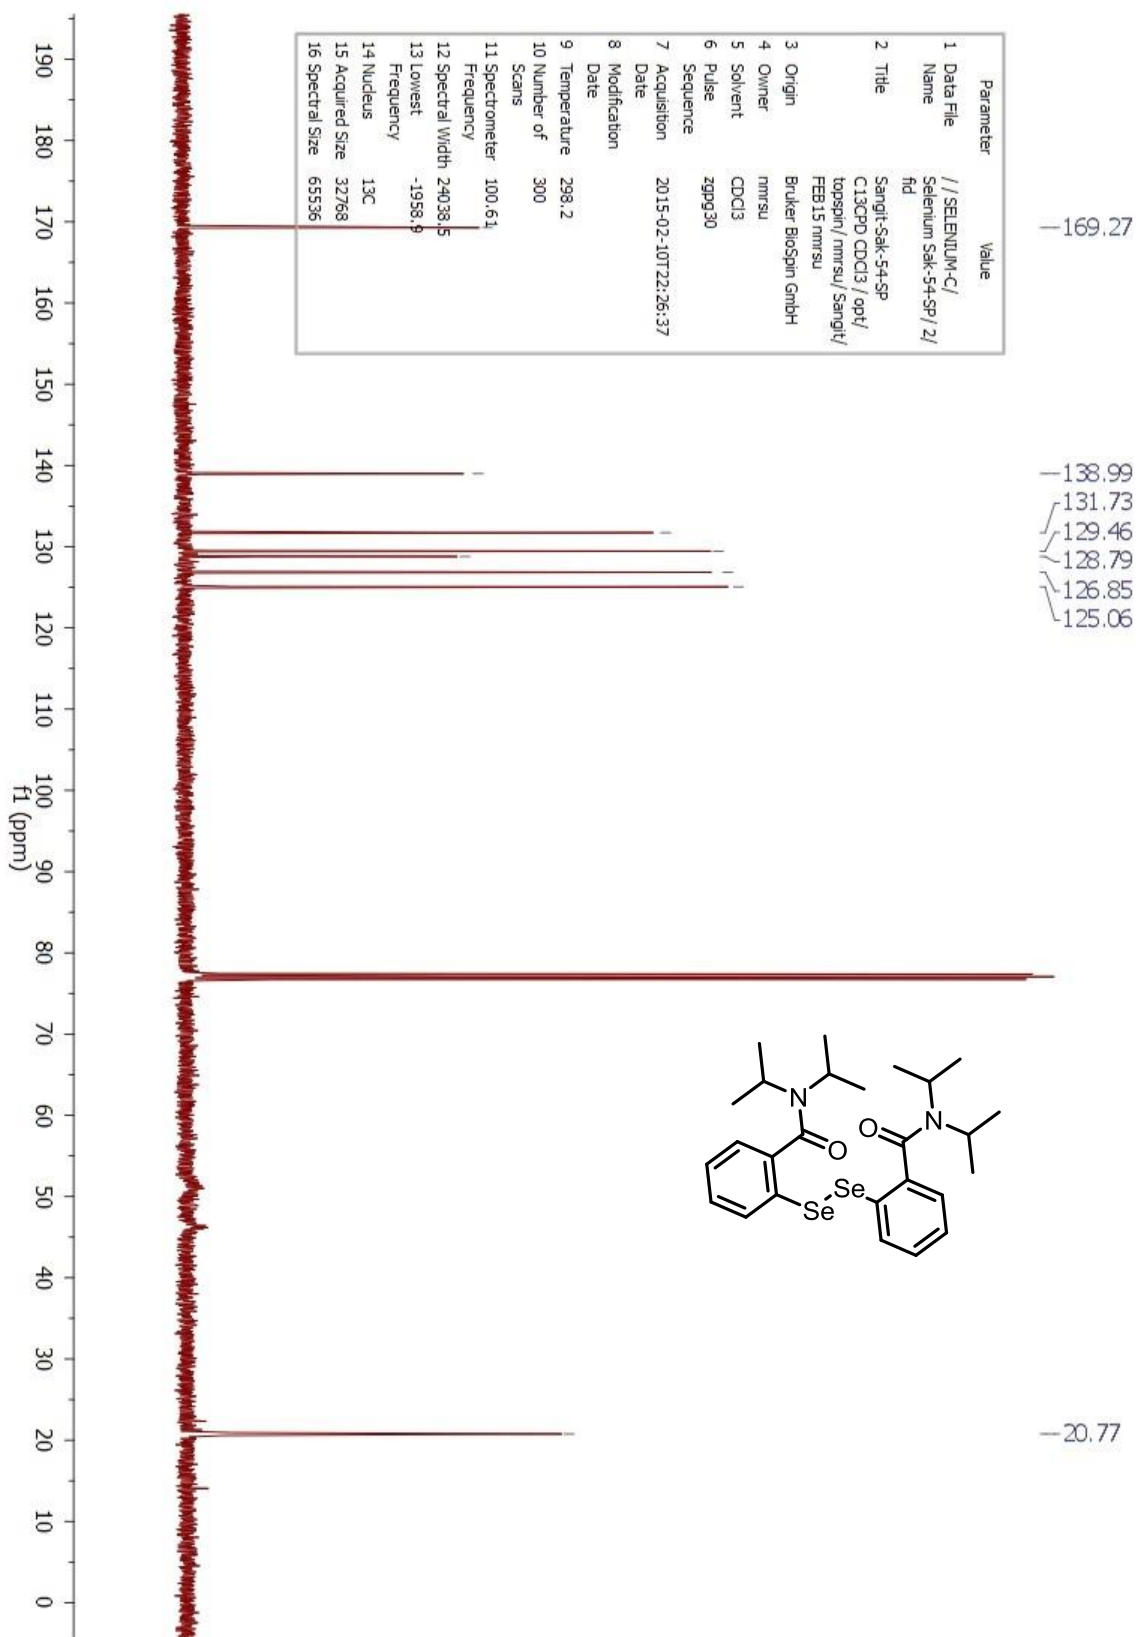

Figure S26  $^{77}\text{Se}$  NMR spectrum of **2c**

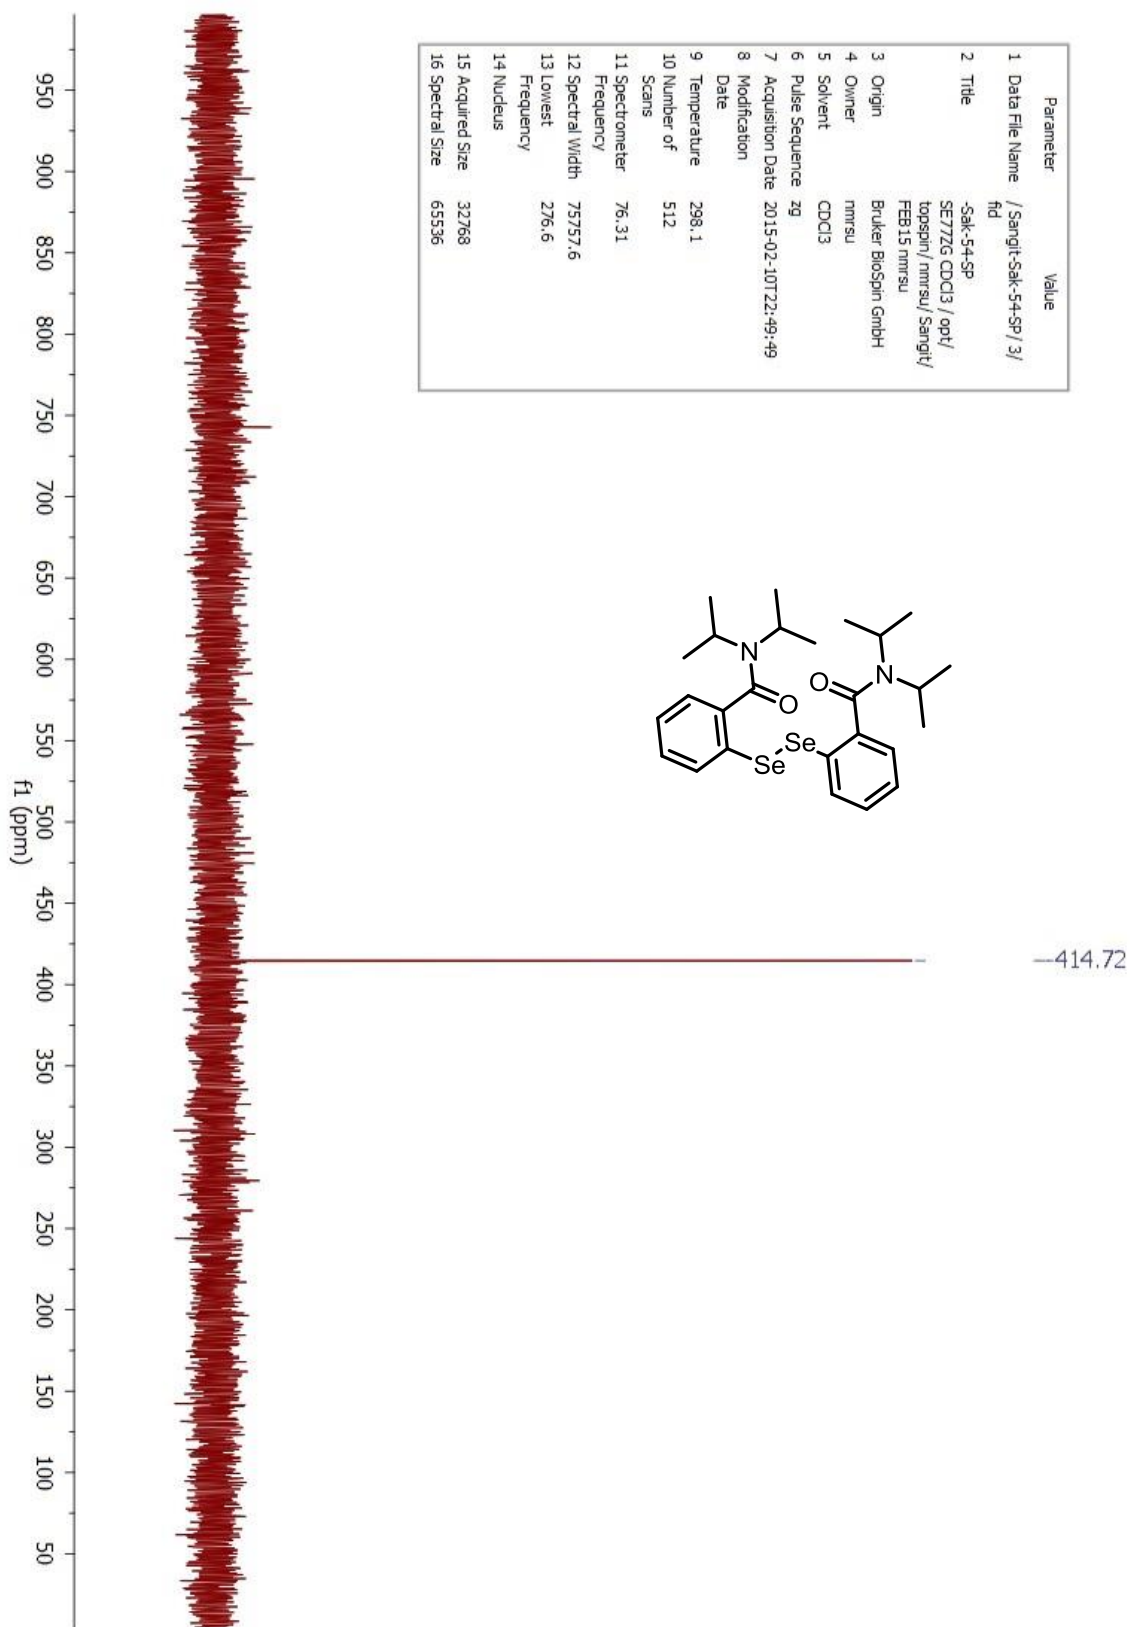

Figure S27 Mass spectrum of **2c**

### Display Report

|                      |                                                                                 |                      |                     |
|----------------------|---------------------------------------------------------------------------------|----------------------|---------------------|
| <b>Analysis Info</b> | Acquisition Date                                                                | 2/25/2015 2:09:41 PM |                     |
| Analysis Name        | D:\Data\user data\2015\FEB-2015\25-feb-2015\Prof.S.Kumar-SAK-54_1-B,3_01_1747.d |                      |                     |
| Method               | HRLCMS-20 Sept tune wide.m                                                      | Operator             | RUCHI               |
| Sample Name          | Prof.S.Kumar-SAK-54                                                             | Instrument           | micrOTOF-Q II 10330 |
| Comment              |                                                                                 |                      |                     |

#### Acquisition Parameter

|             |            |                       |           |                  |           |
|-------------|------------|-----------------------|-----------|------------------|-----------|
| Source Type | ESI        | Ion Polarity          | Positive  | Set Nebulizer    | 1.2 Bar   |
| Focus       | Not active | Set Capillary         | 4500 V    | Set Dry Heater   | 200 °C    |
| Scan Begin  | 50 m/z     | Set End Plate Offset  | -500 V    | Set Dry Gas      | 7.0 l/min |
| Scan End    | 3000 m/z   | Set Collision Cell RF | 600.0 Vpp | Set Divert Valve | Waste     |

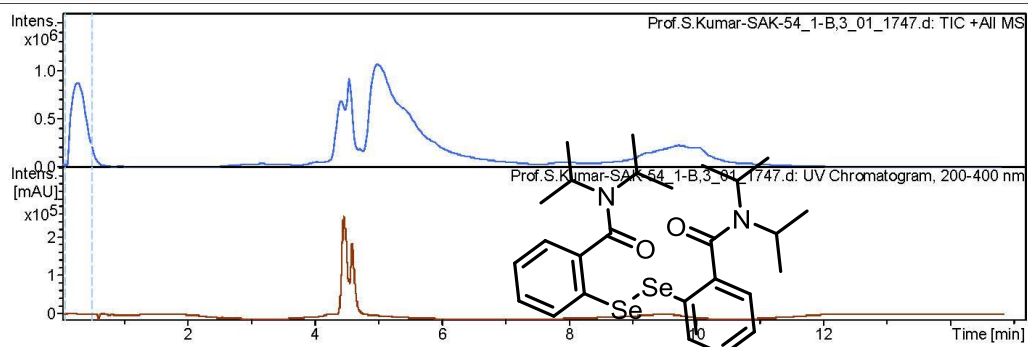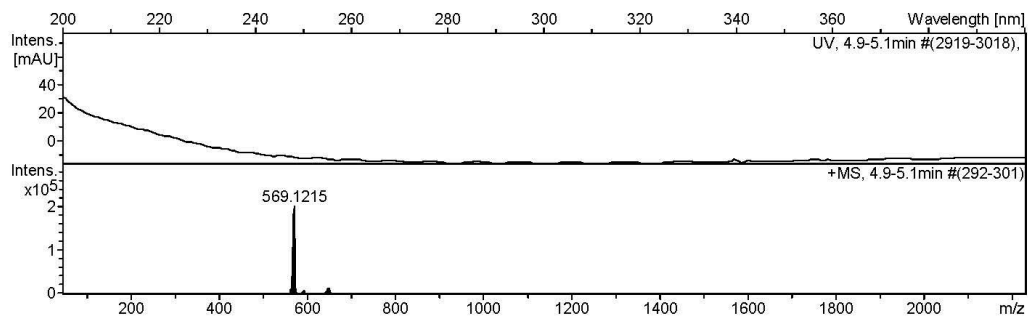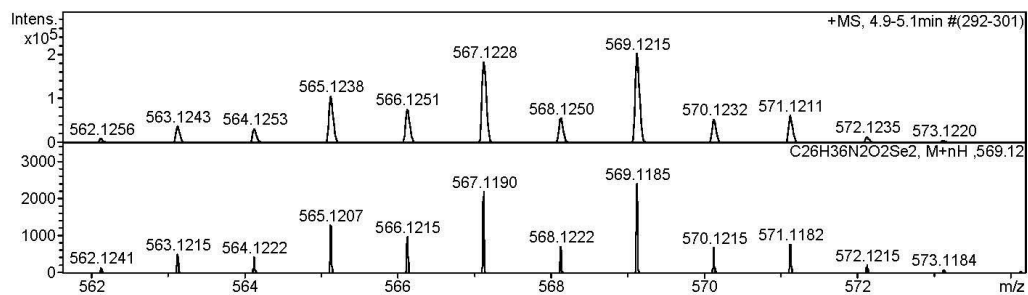

Figure S28 <sup>1</sup>H NMR spectrum of **3c**

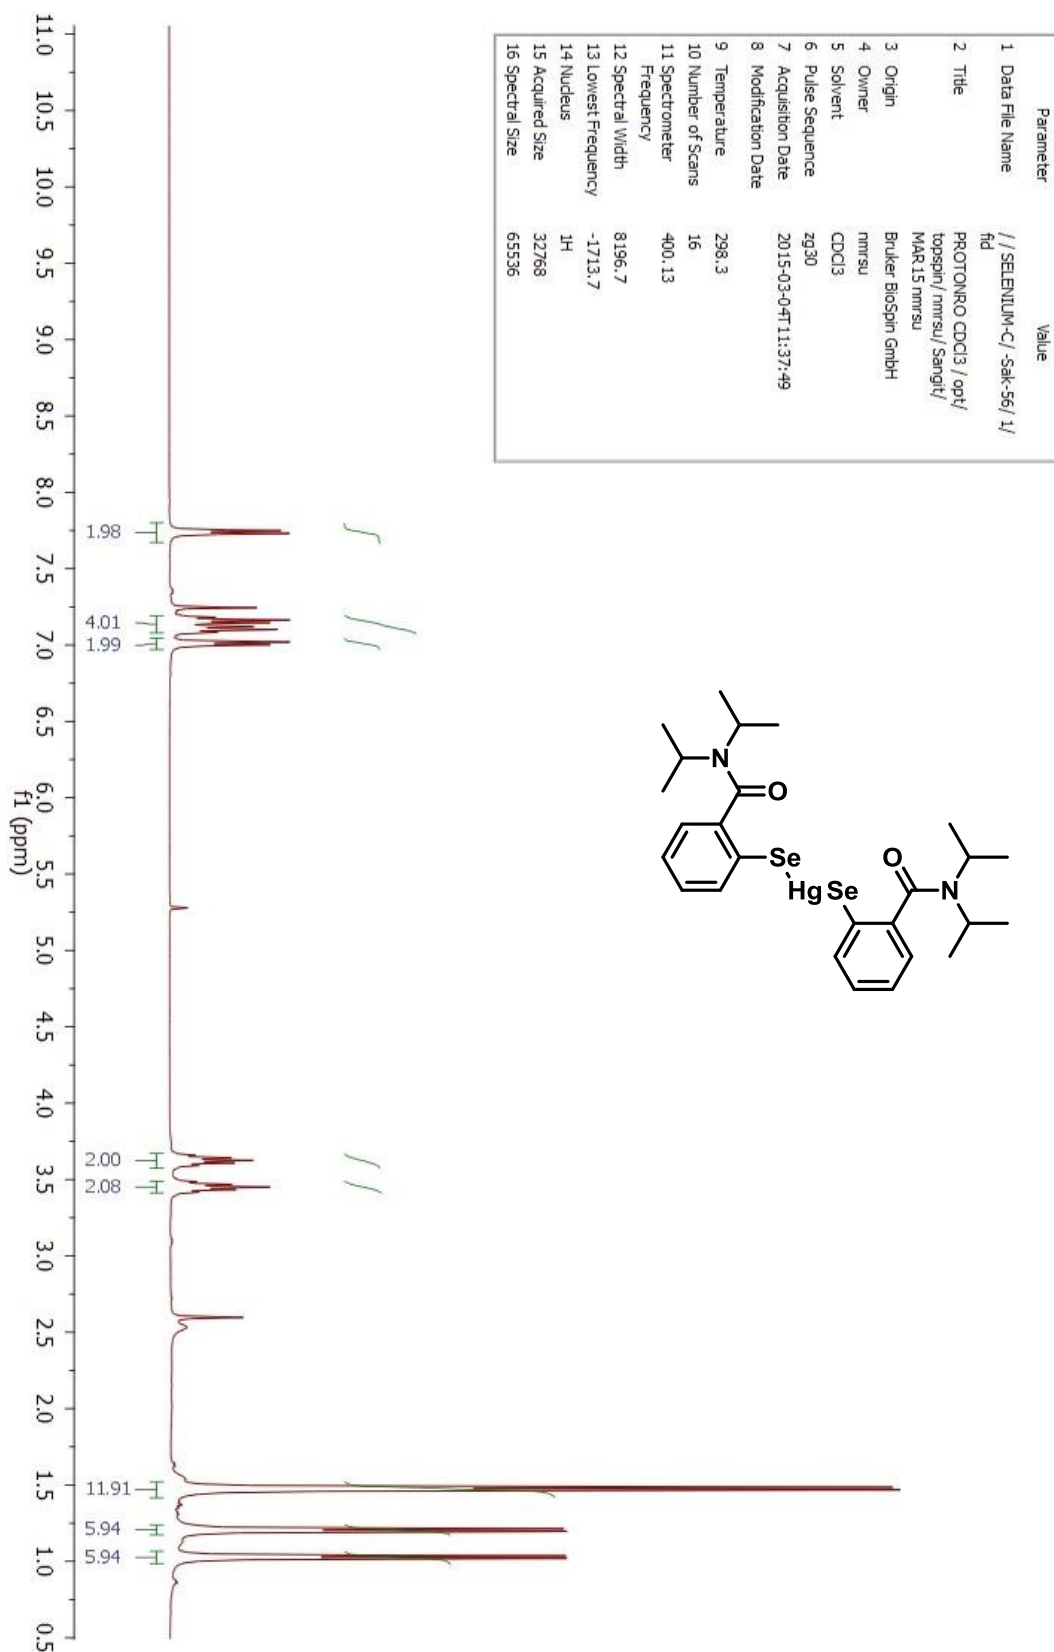

Figure S29  $^{13}\text{C}$  NMR spectrum of **3c**

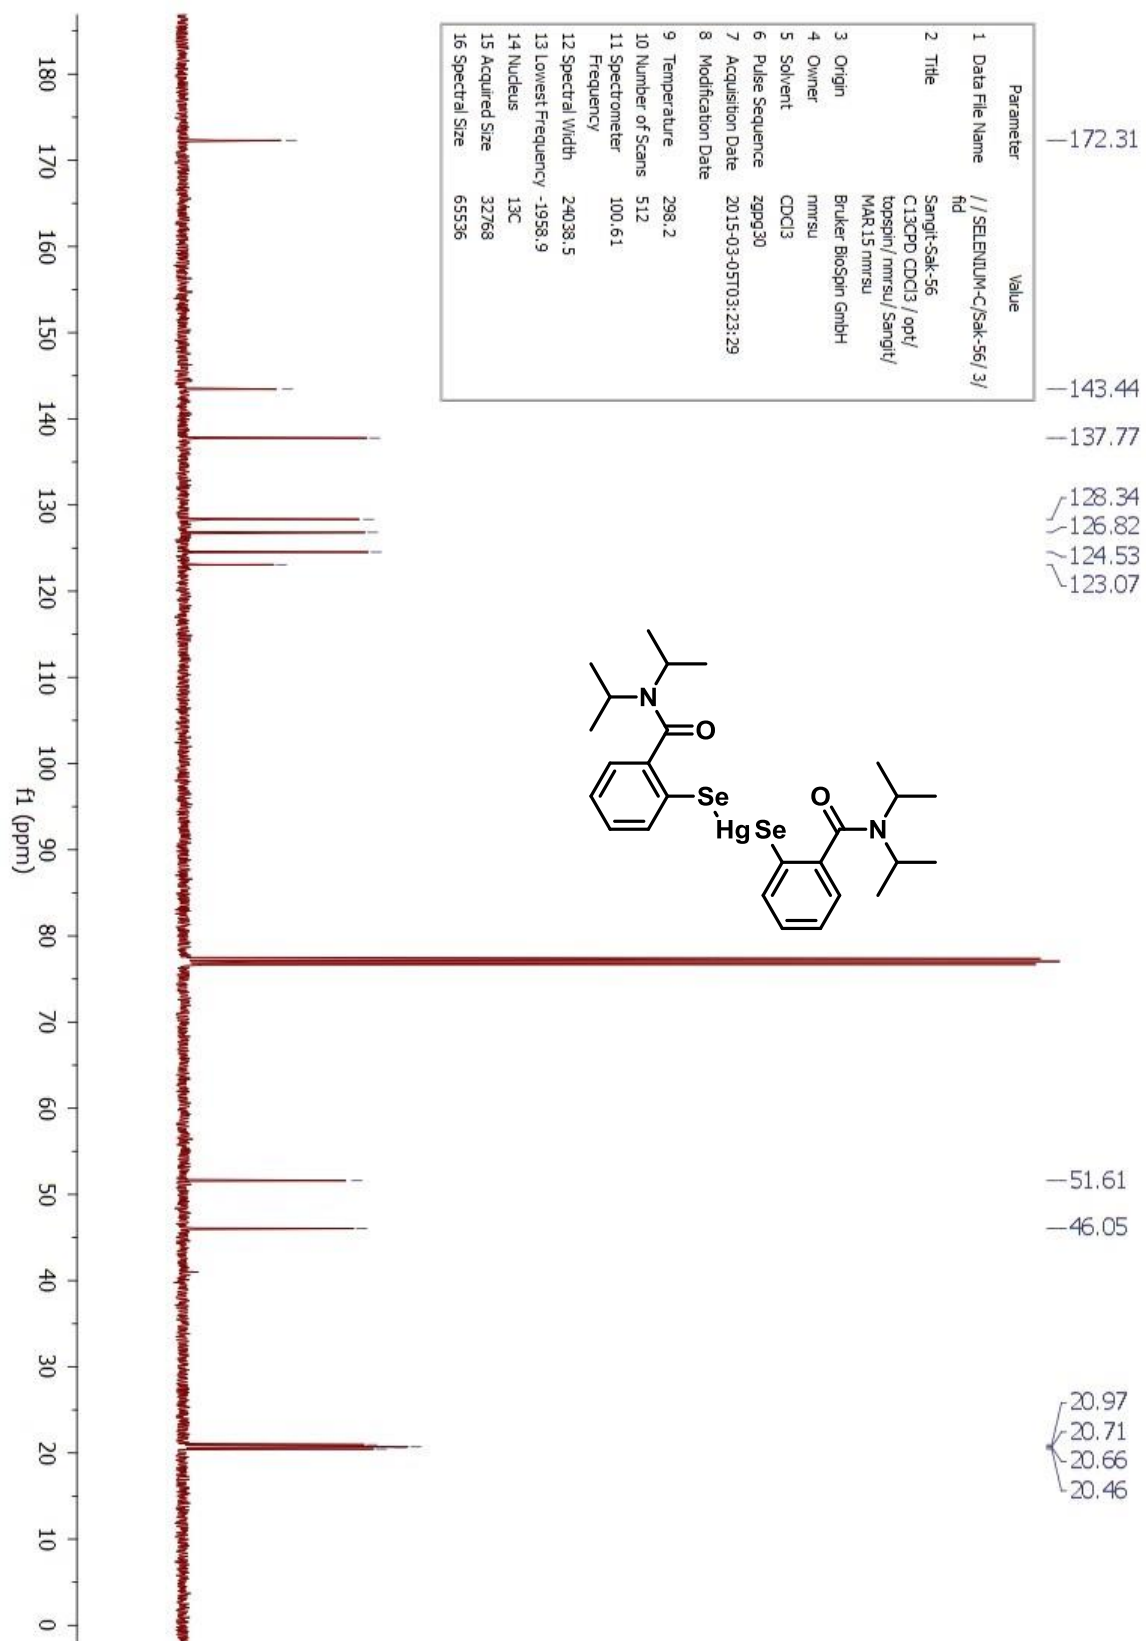

Figure S30  $^{77}\text{Se}$  NMR spectrum of **3c**

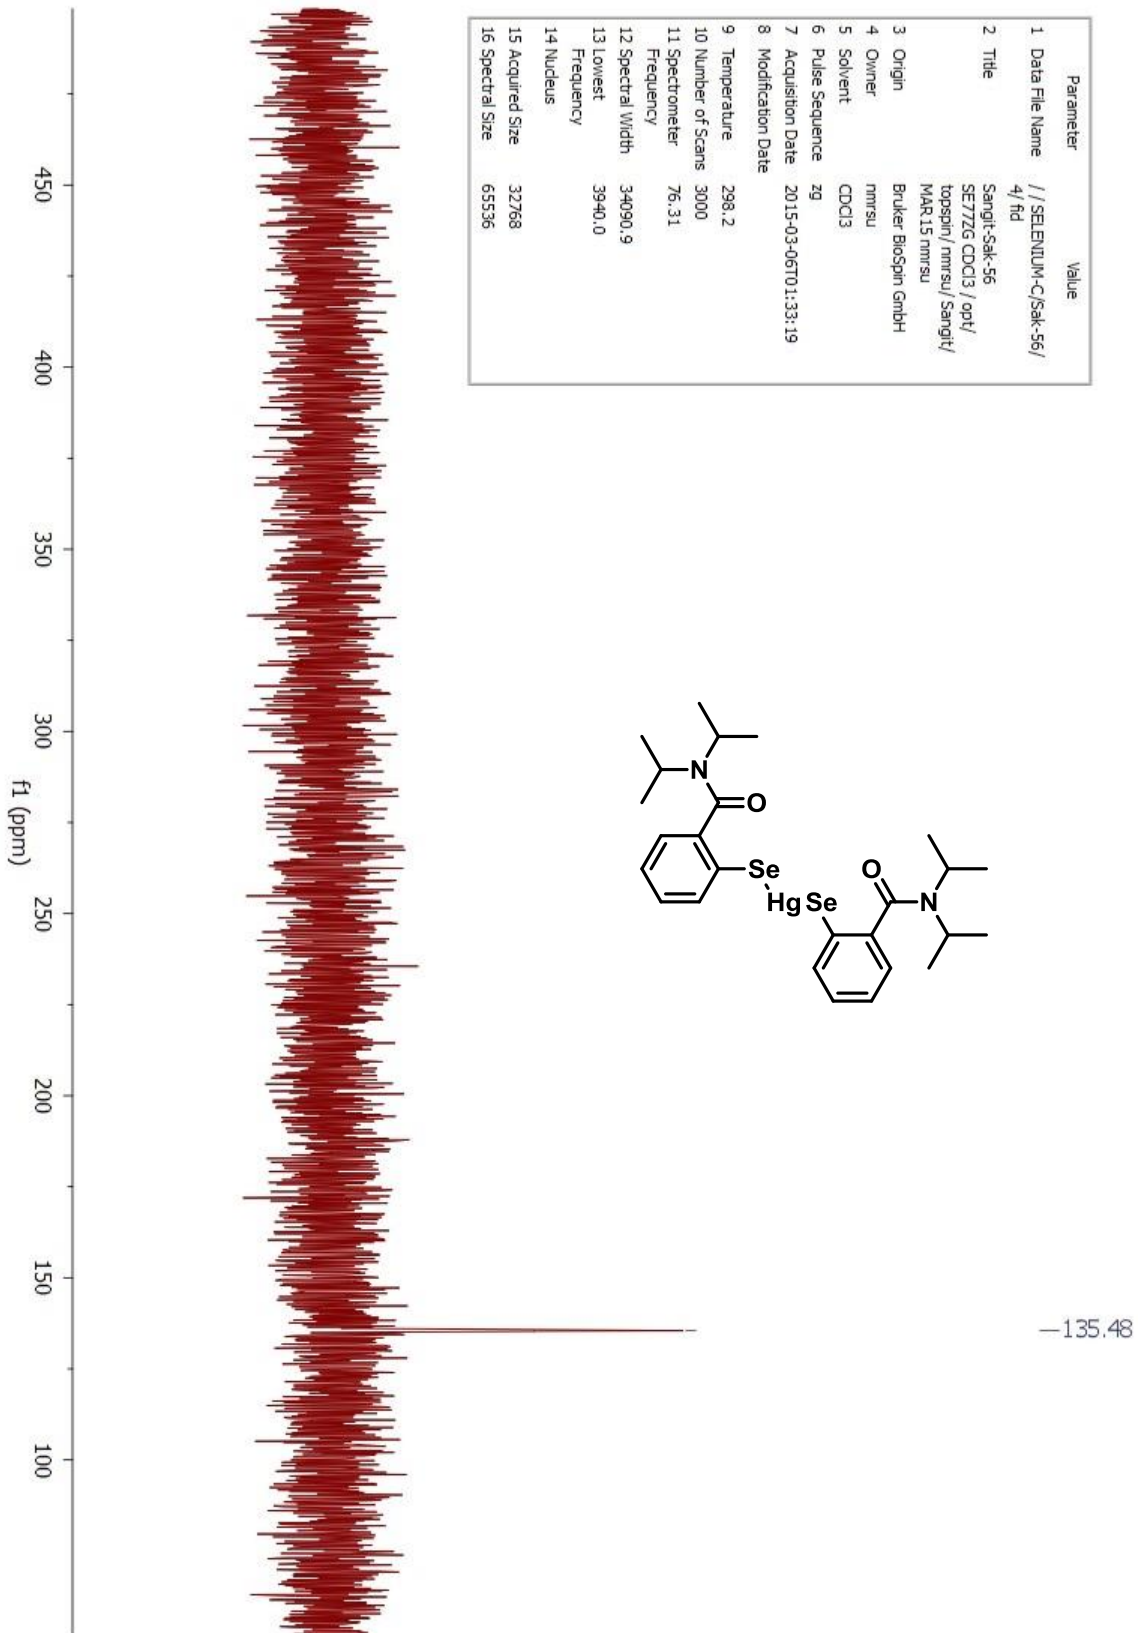



Figure S31 Mass spectrum of **3c**

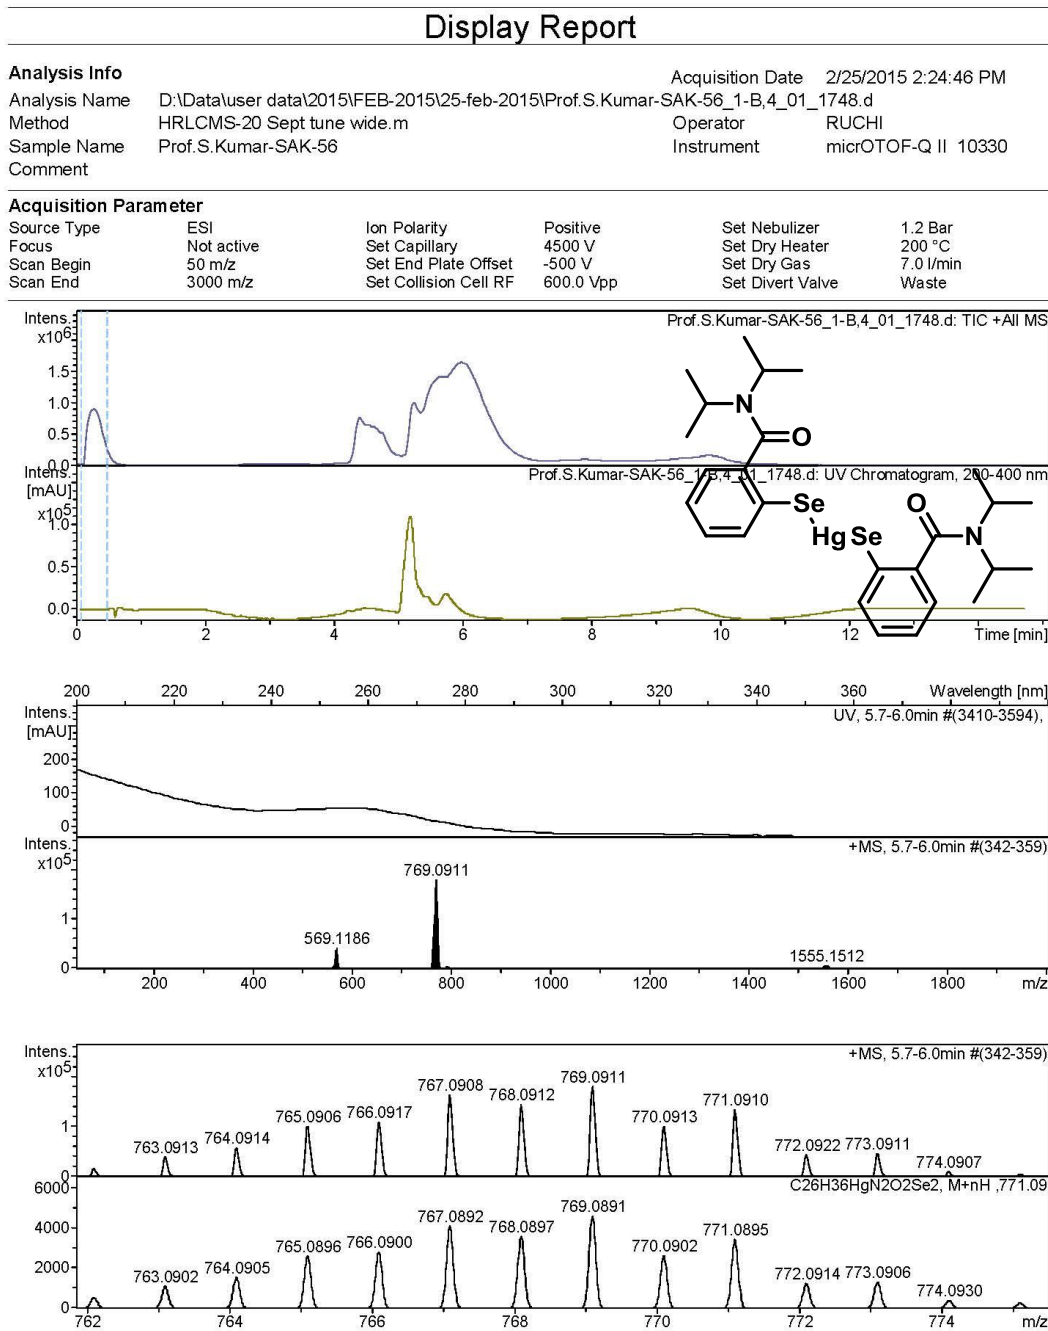

Figure S32.  $^1\text{H}$  NMR of **4a**

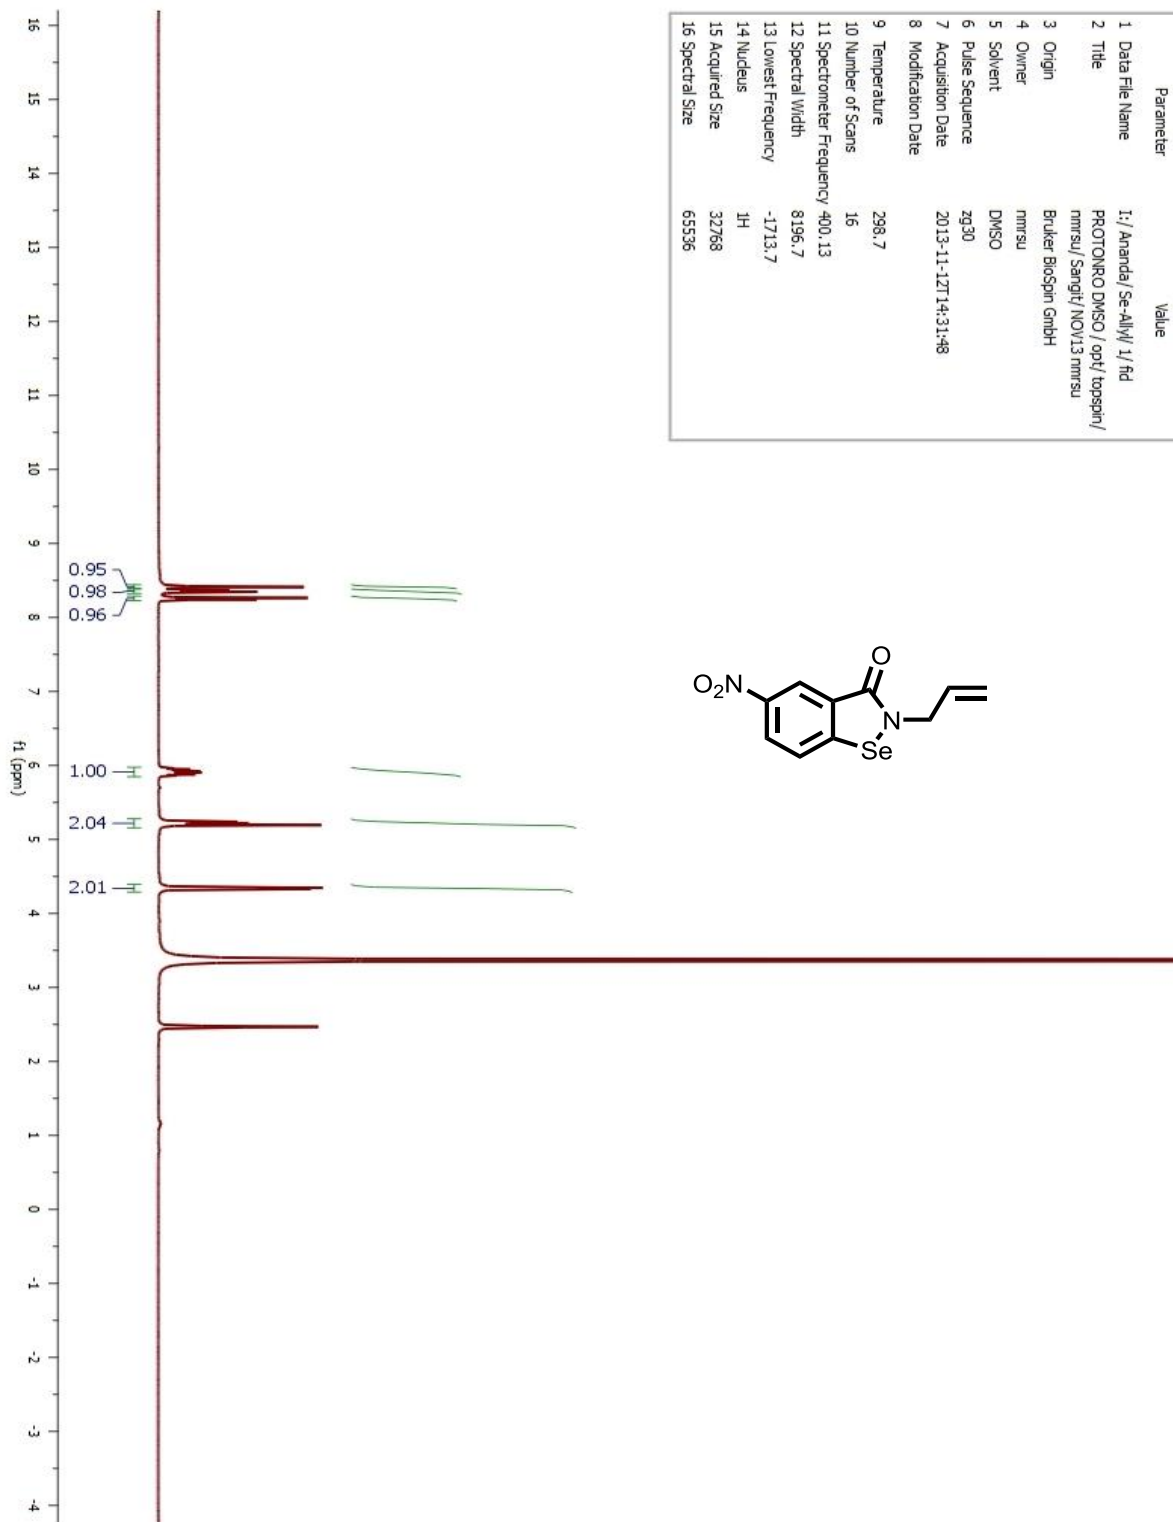

Figure S33.  $^{13}\text{C}$  NMR of **4a**

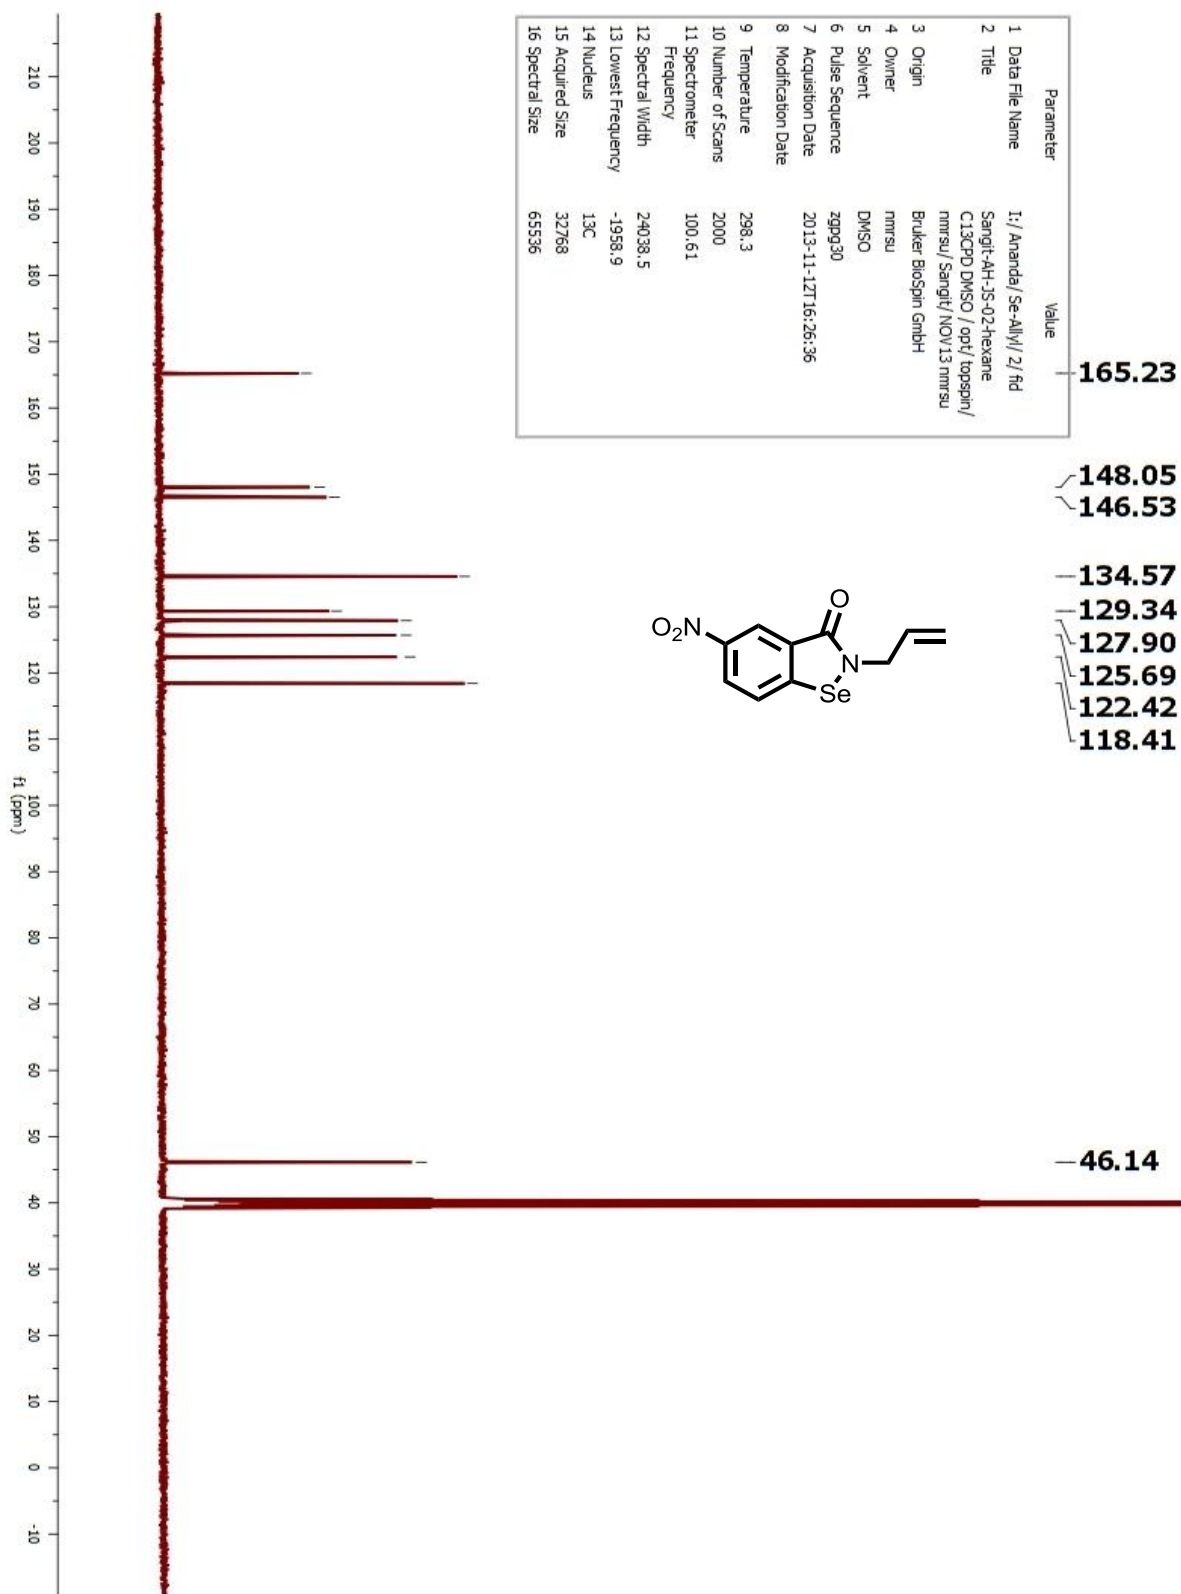

Figure S34.  $^{77}\text{Se}$  NMR of **4a**

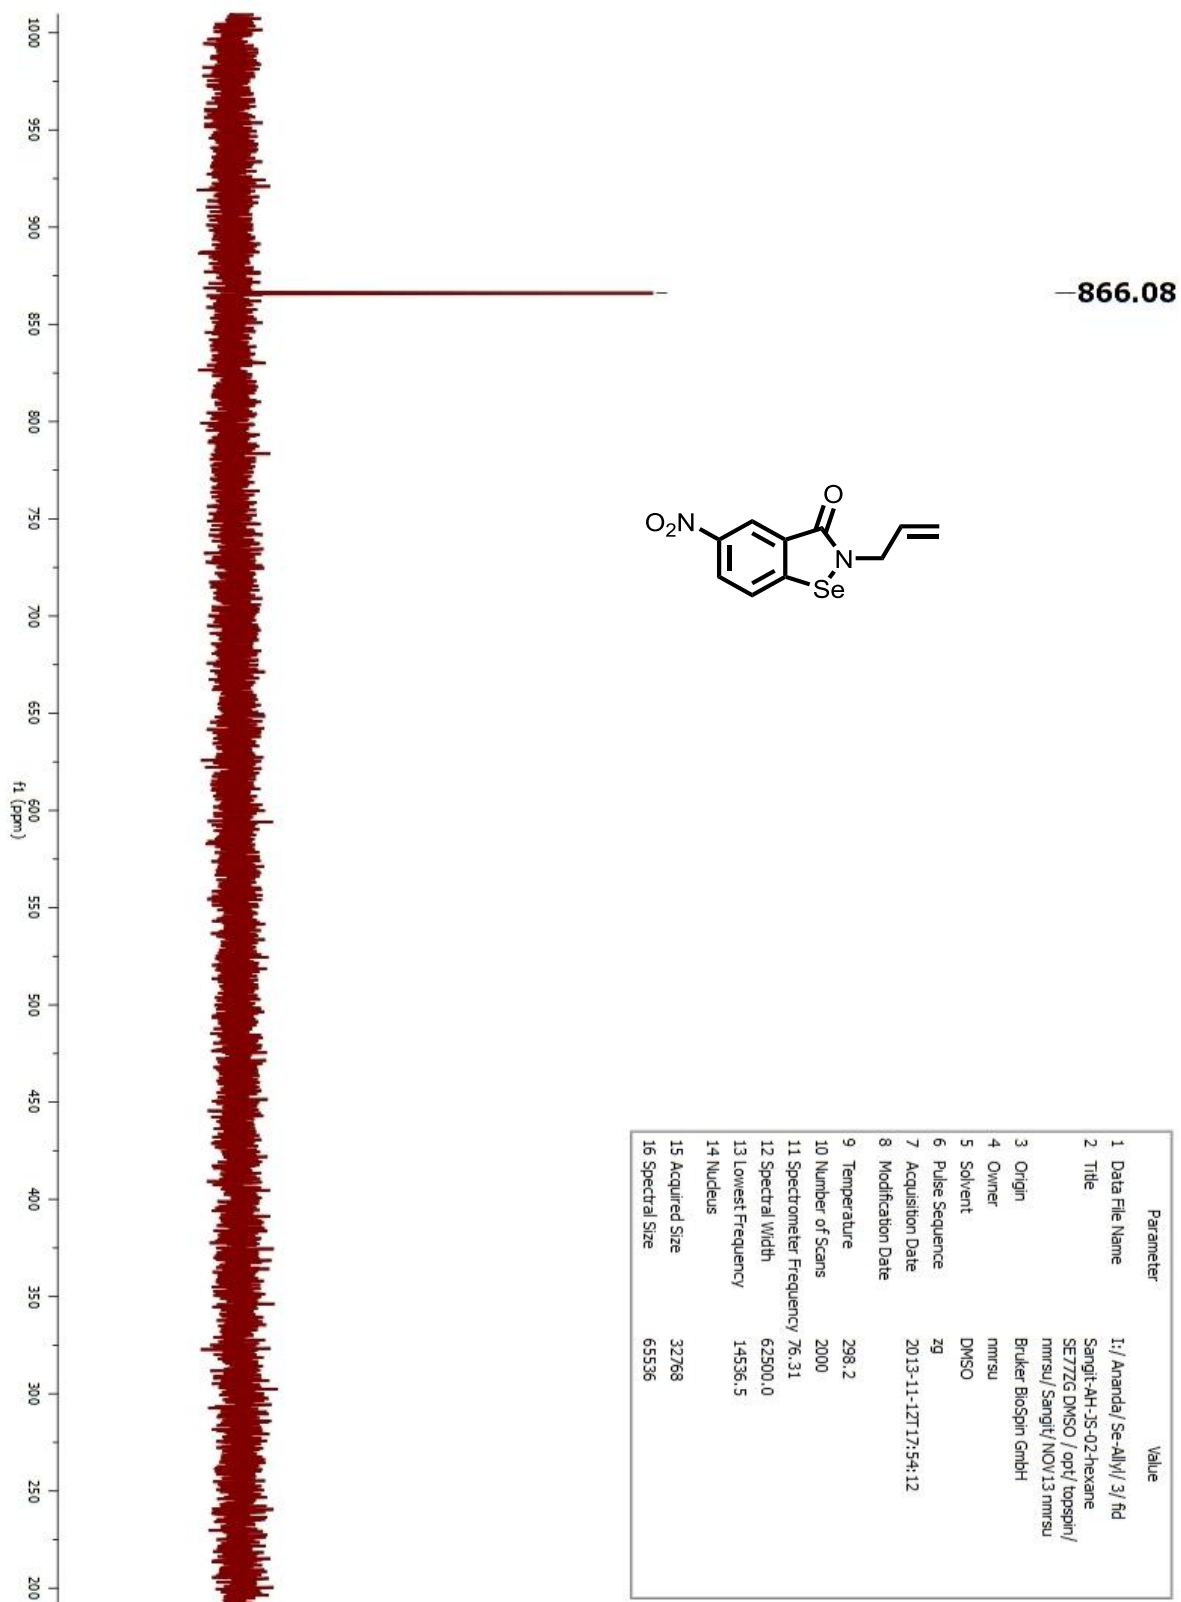

Figure S35. Mass spectrum of 4a

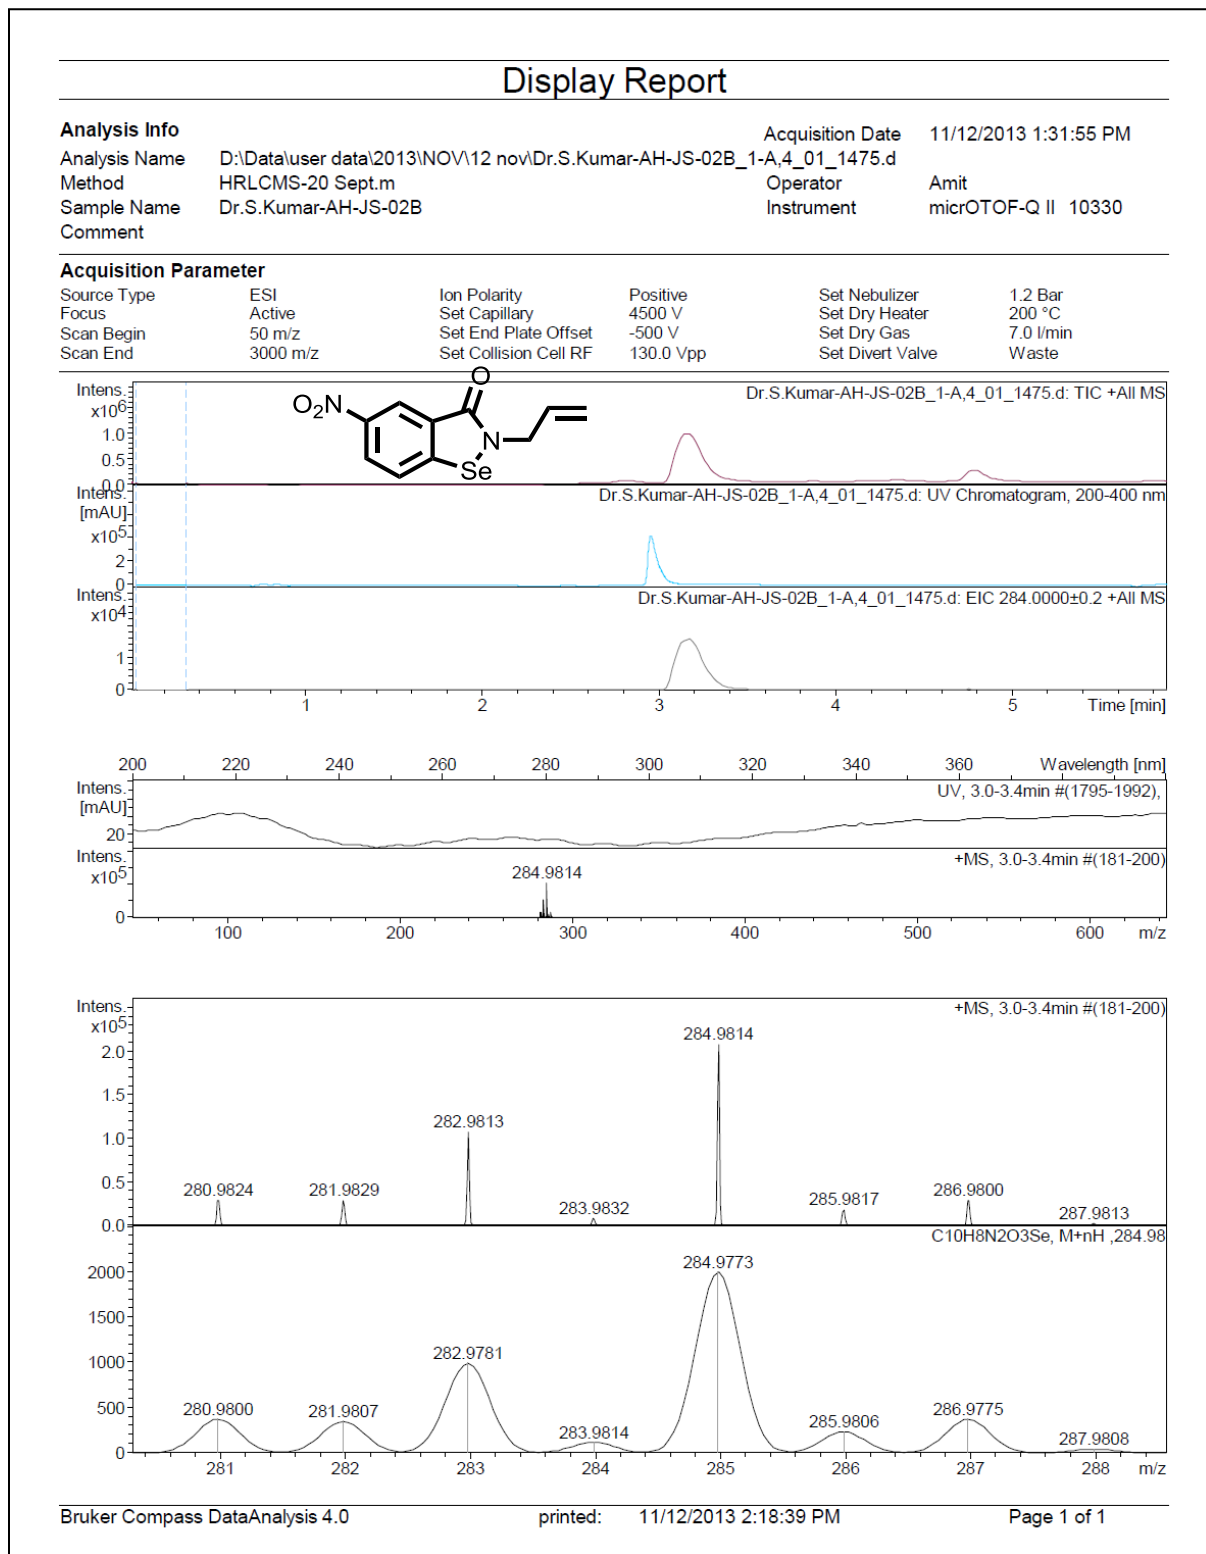

Figure S36. <sup>1</sup>H NMR of **4b**

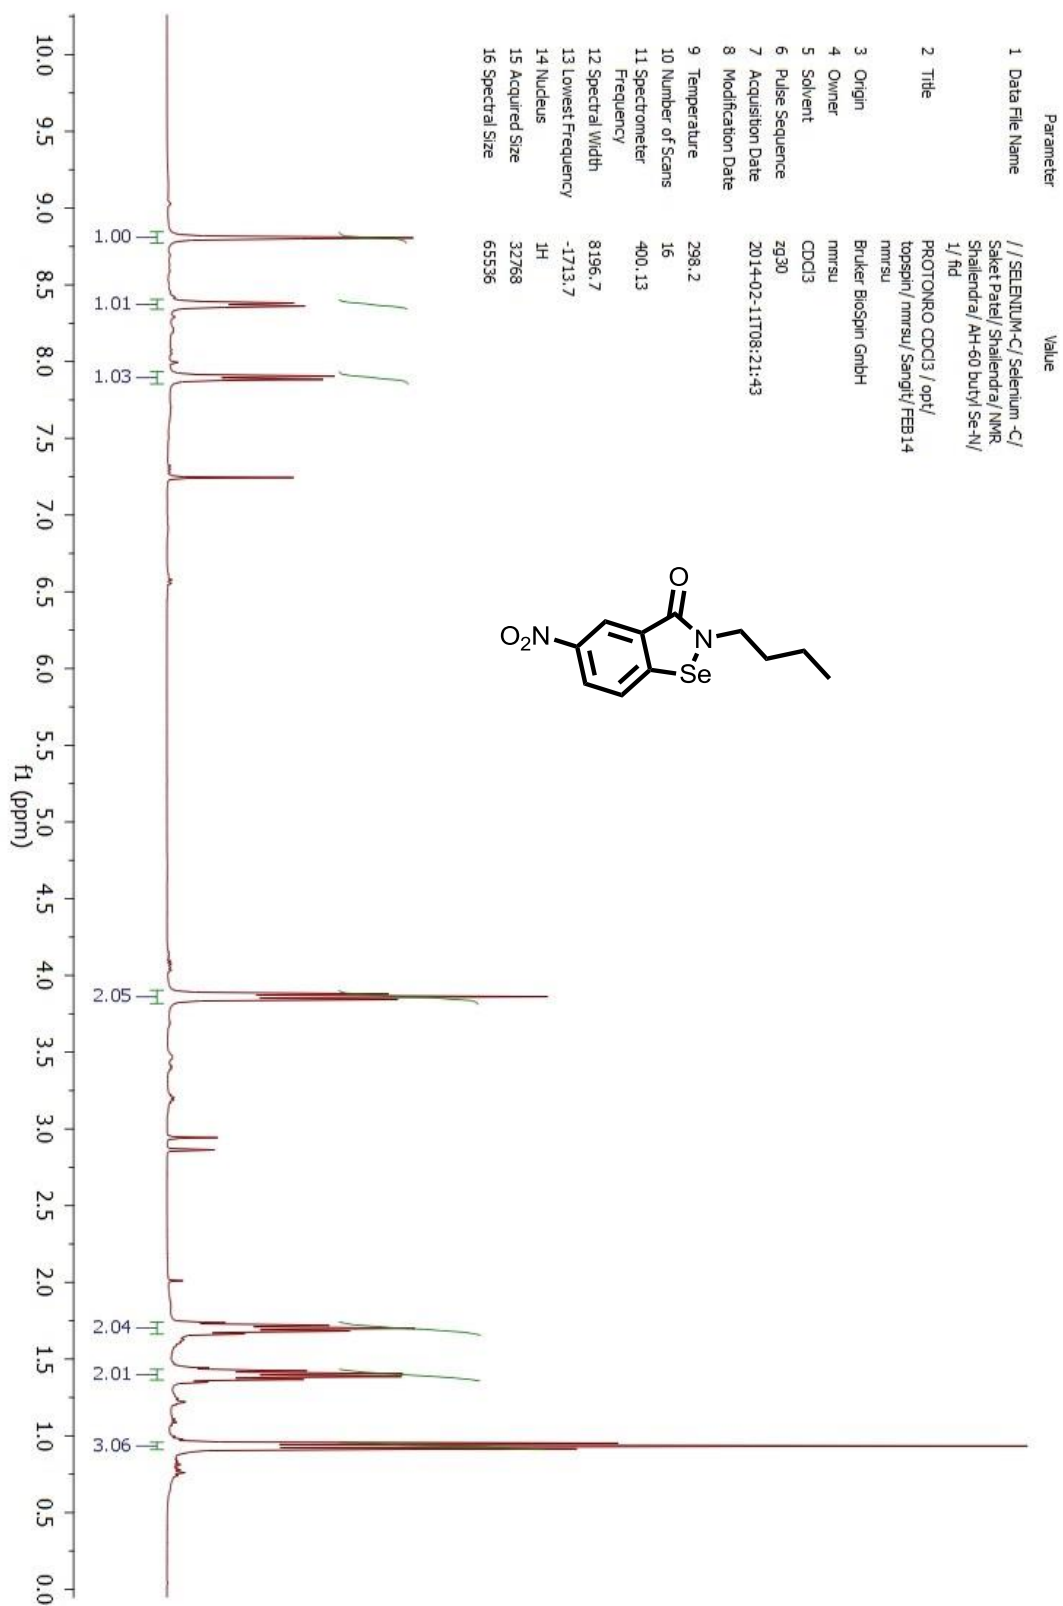

Figure S37.  $^{13}\text{C}$  NMR of **4b**

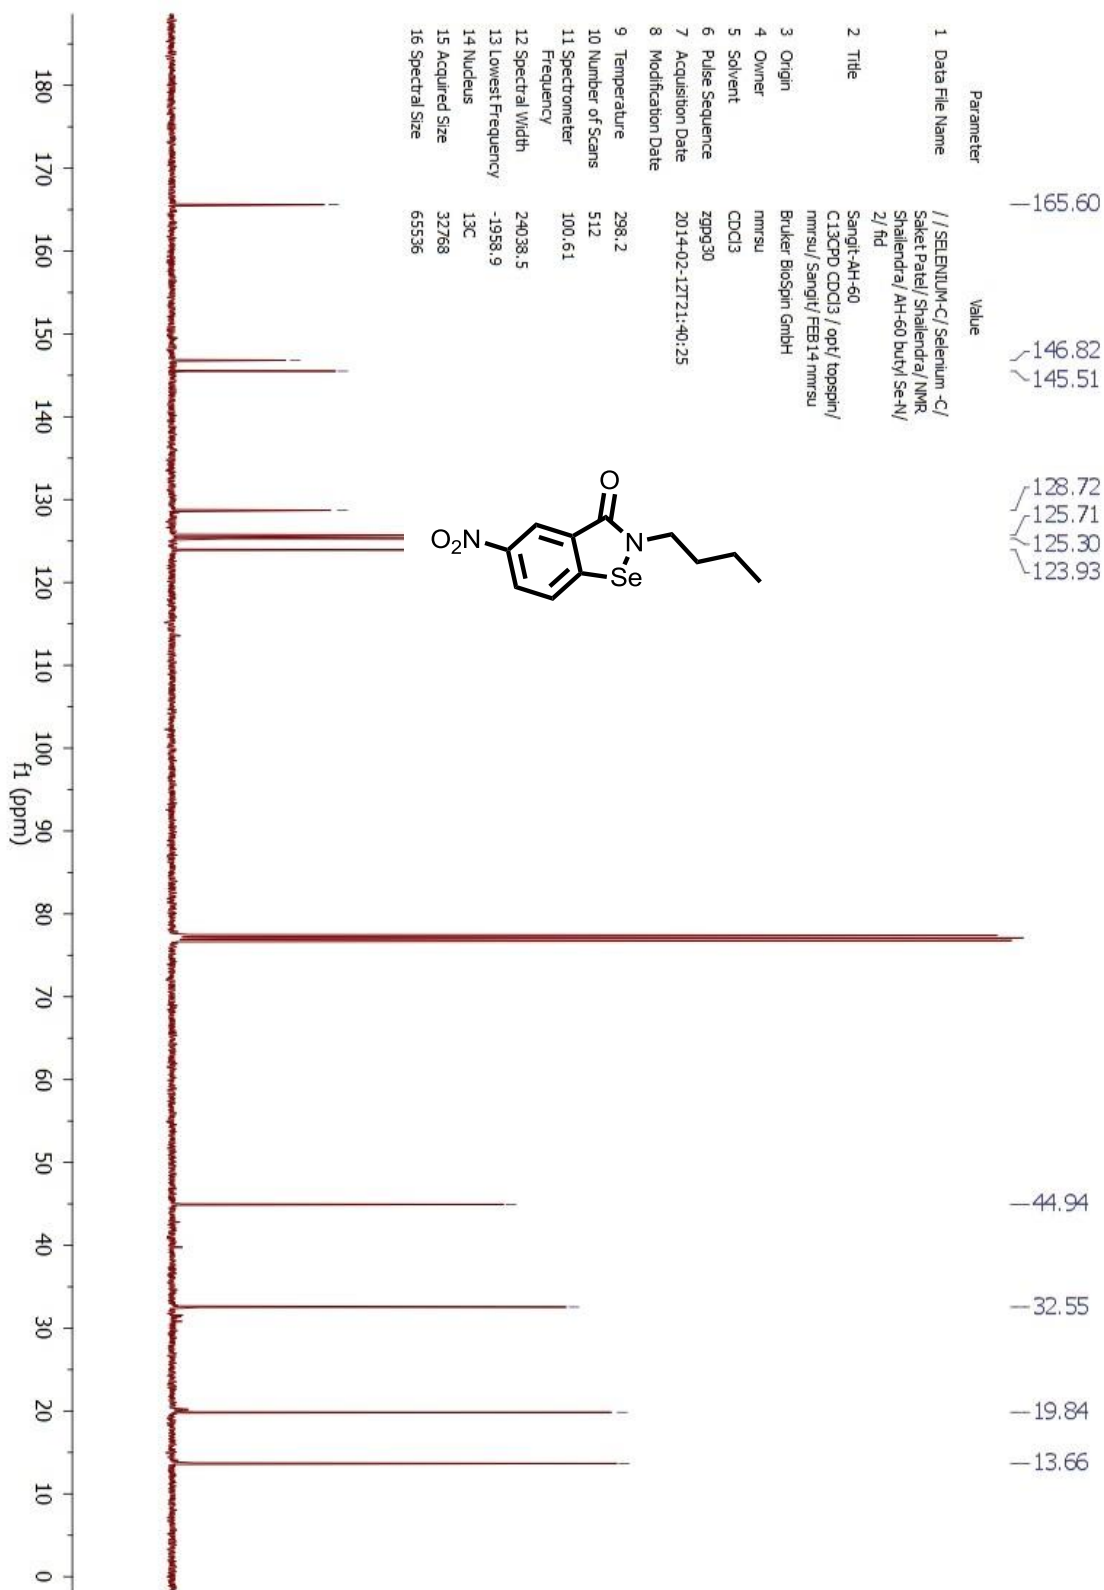

Figure S38.  $^{77}\text{Se}$  NMR of **4b**

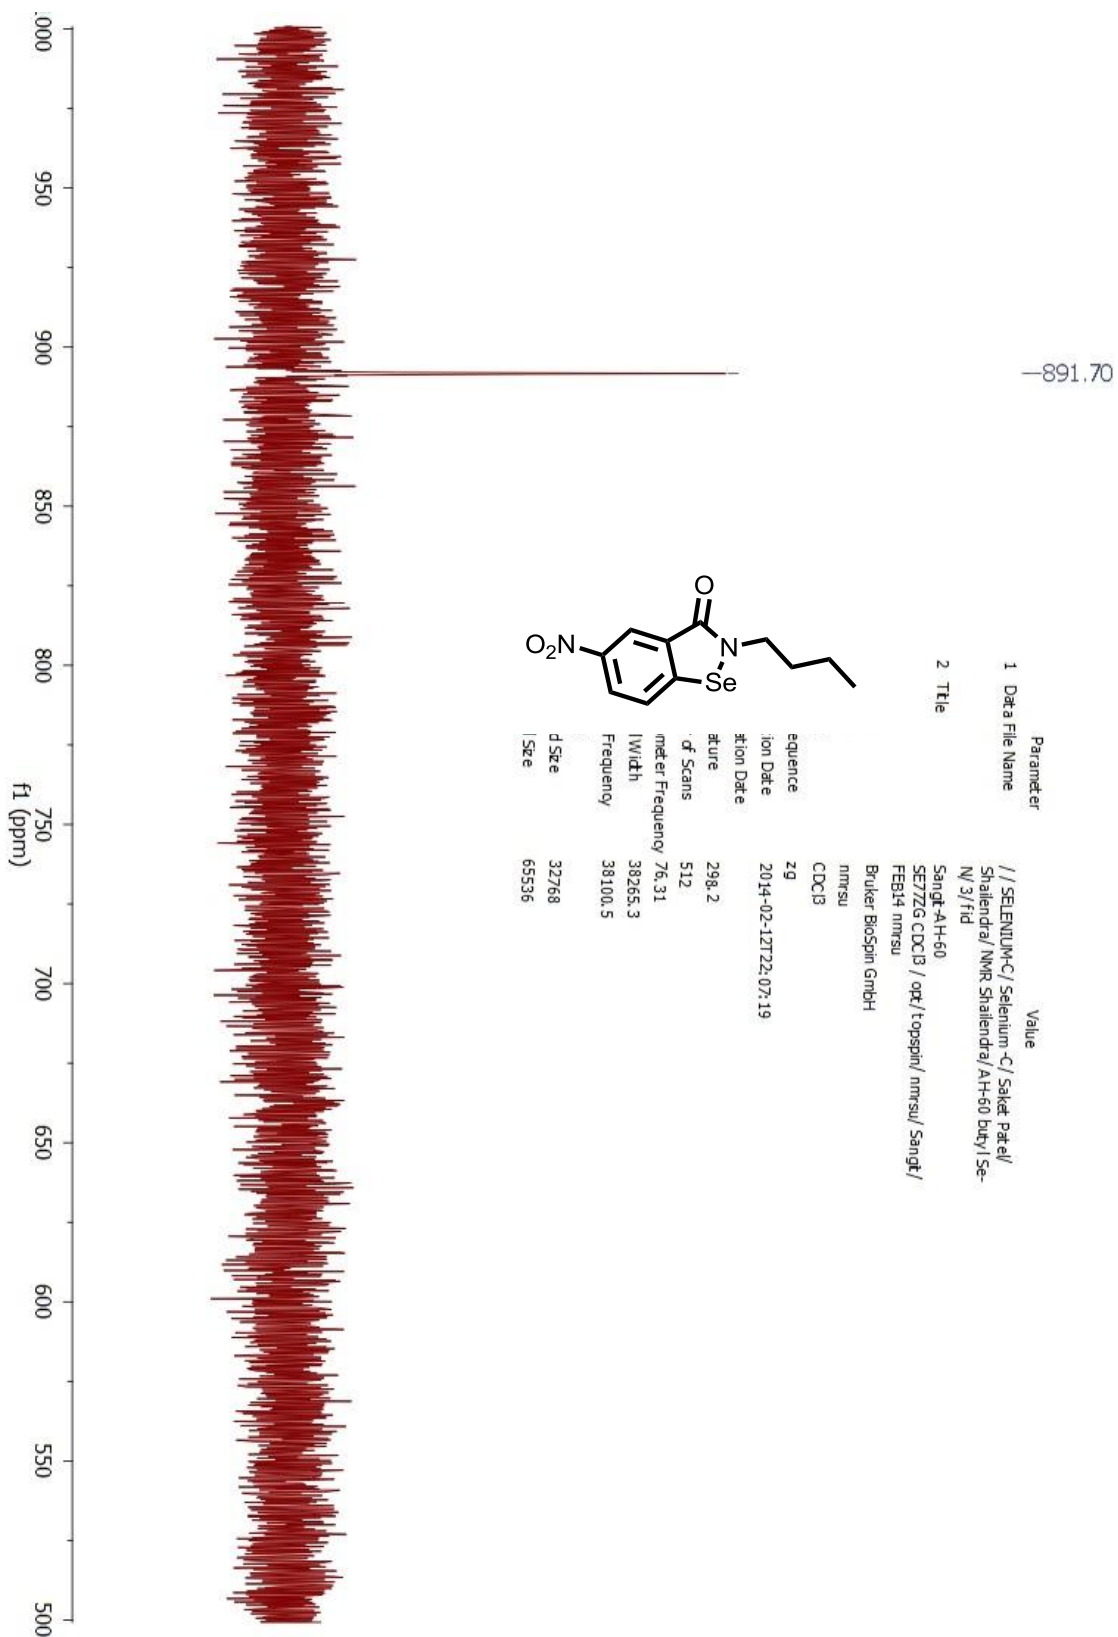



Figure S39. Mass spectrum of **4b**

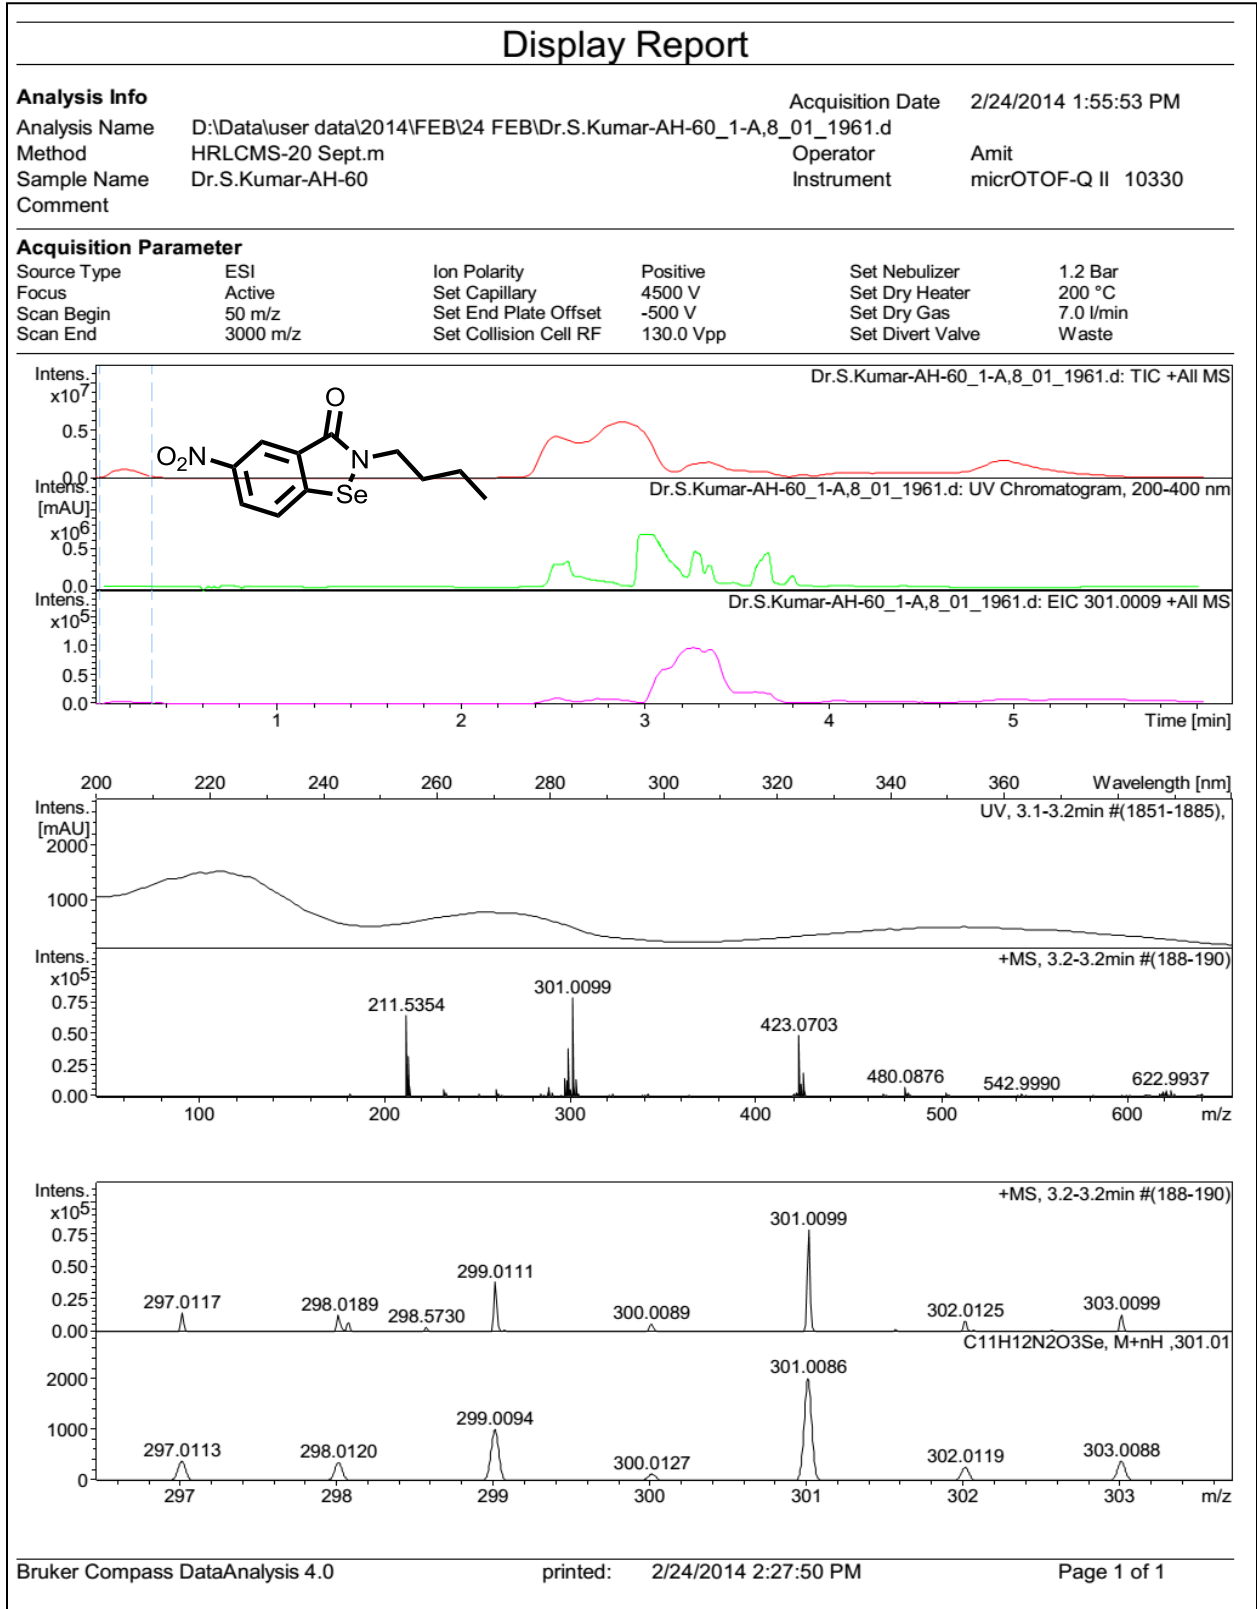

Figure S40.  $^1\text{H}$  NMR of **2d**

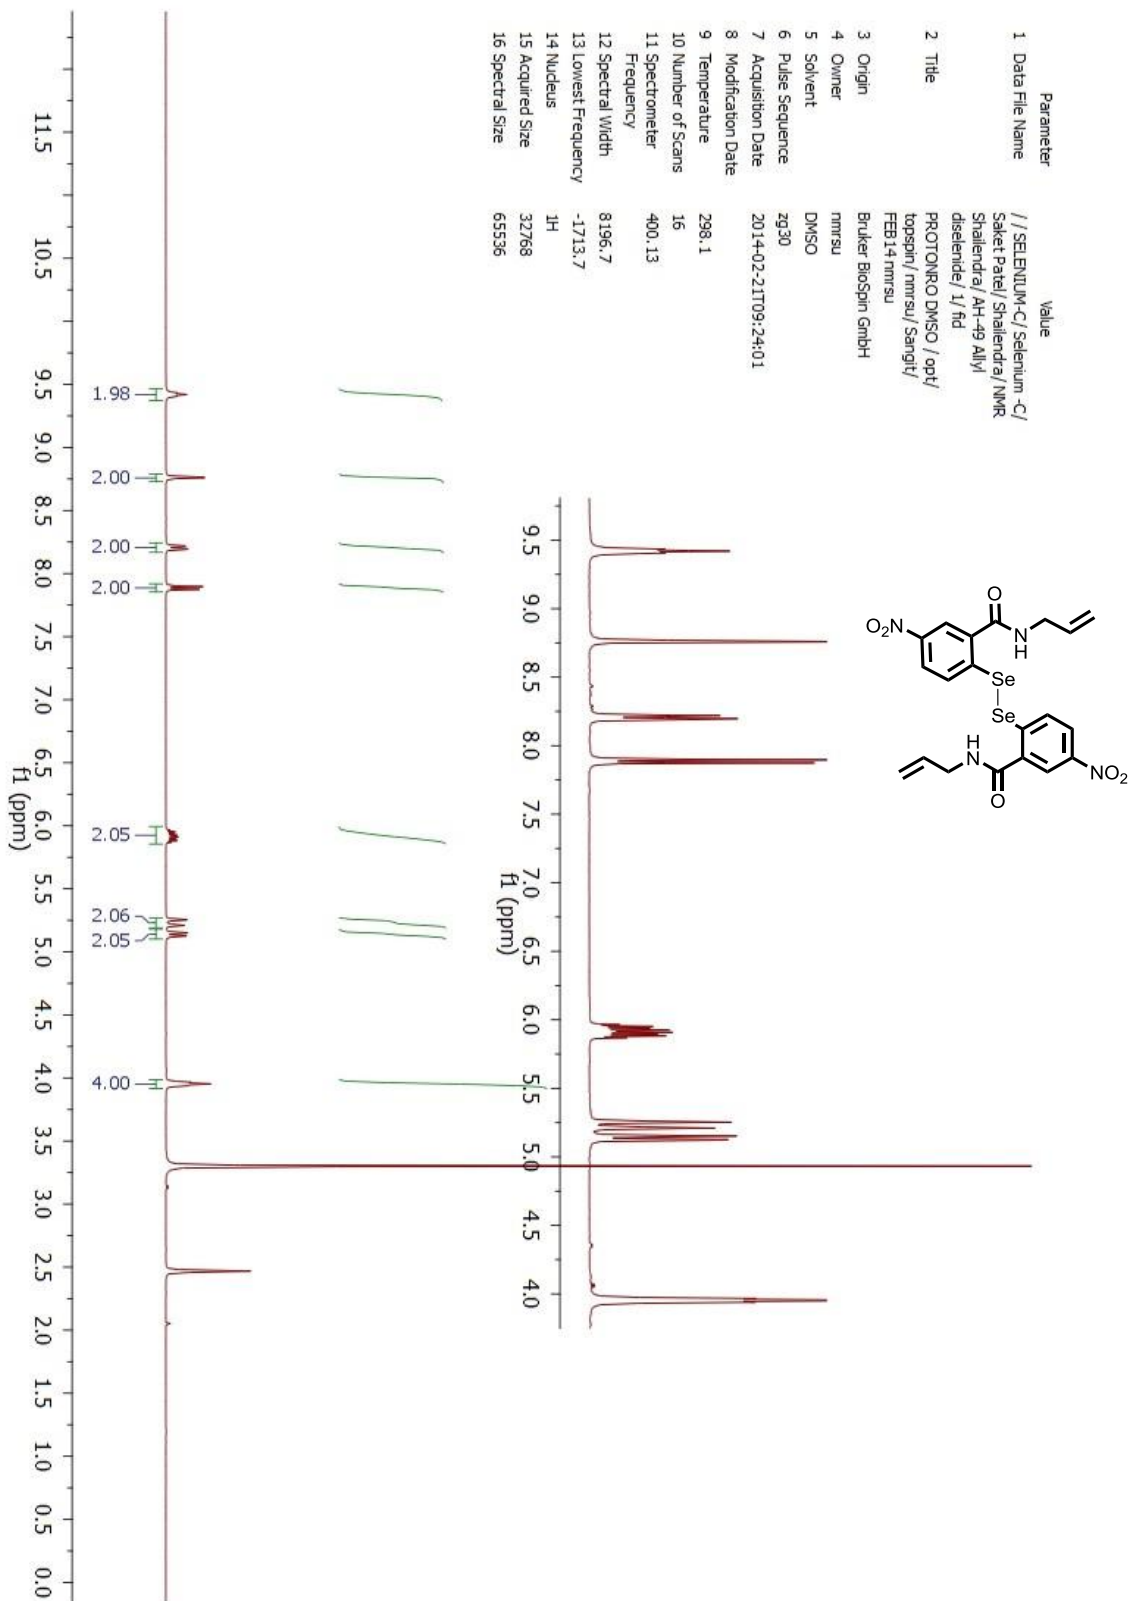

Figure S41.  $^{13}\text{C}$  NMR of **2d**

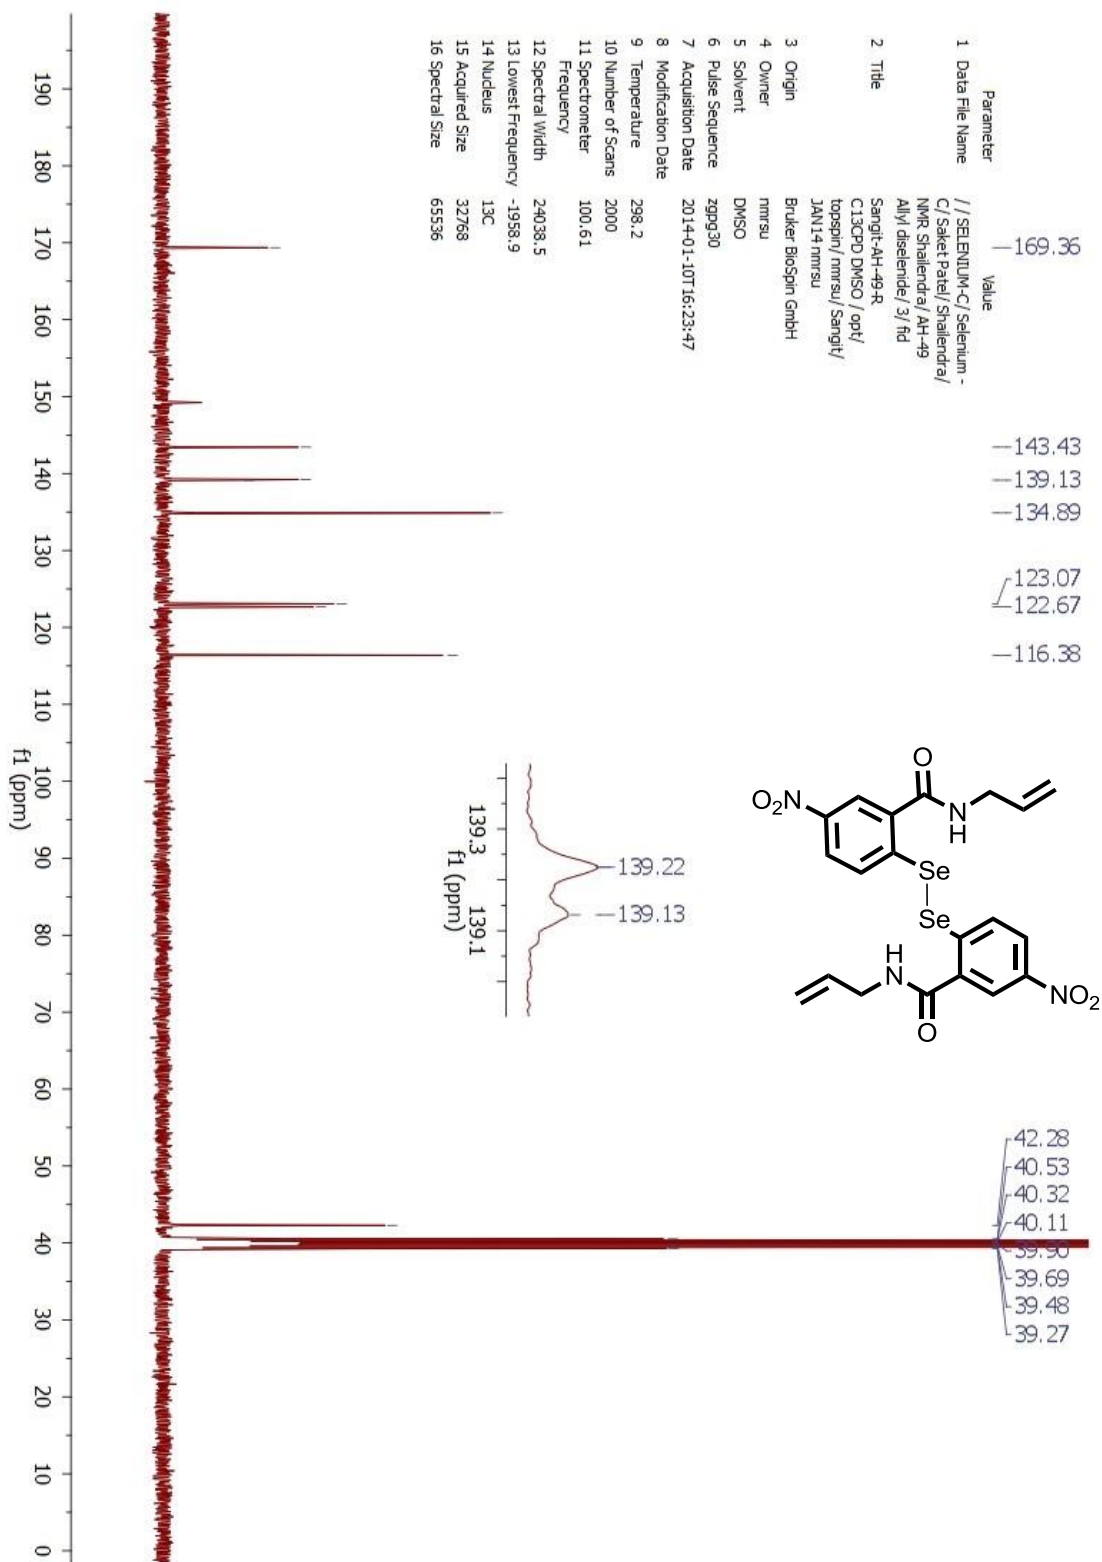

Figure S42.  $^{77}\text{Se}$  NMR of **2d**

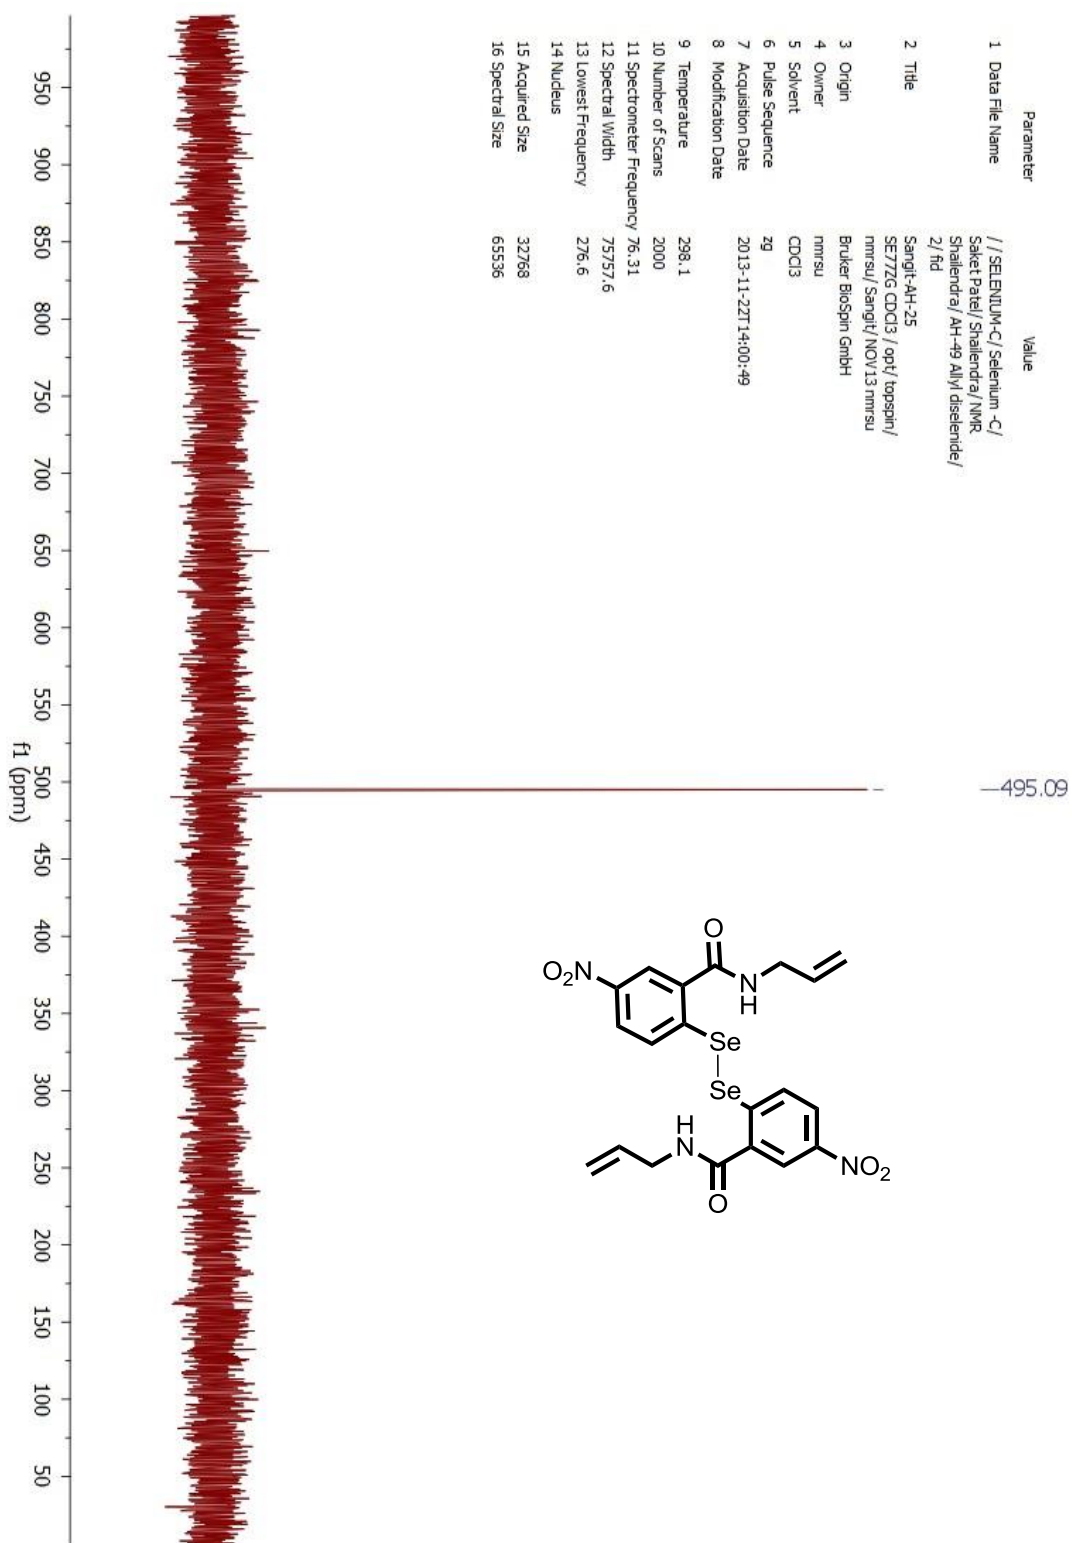

Figure S43. Mass spectrum of **2d**

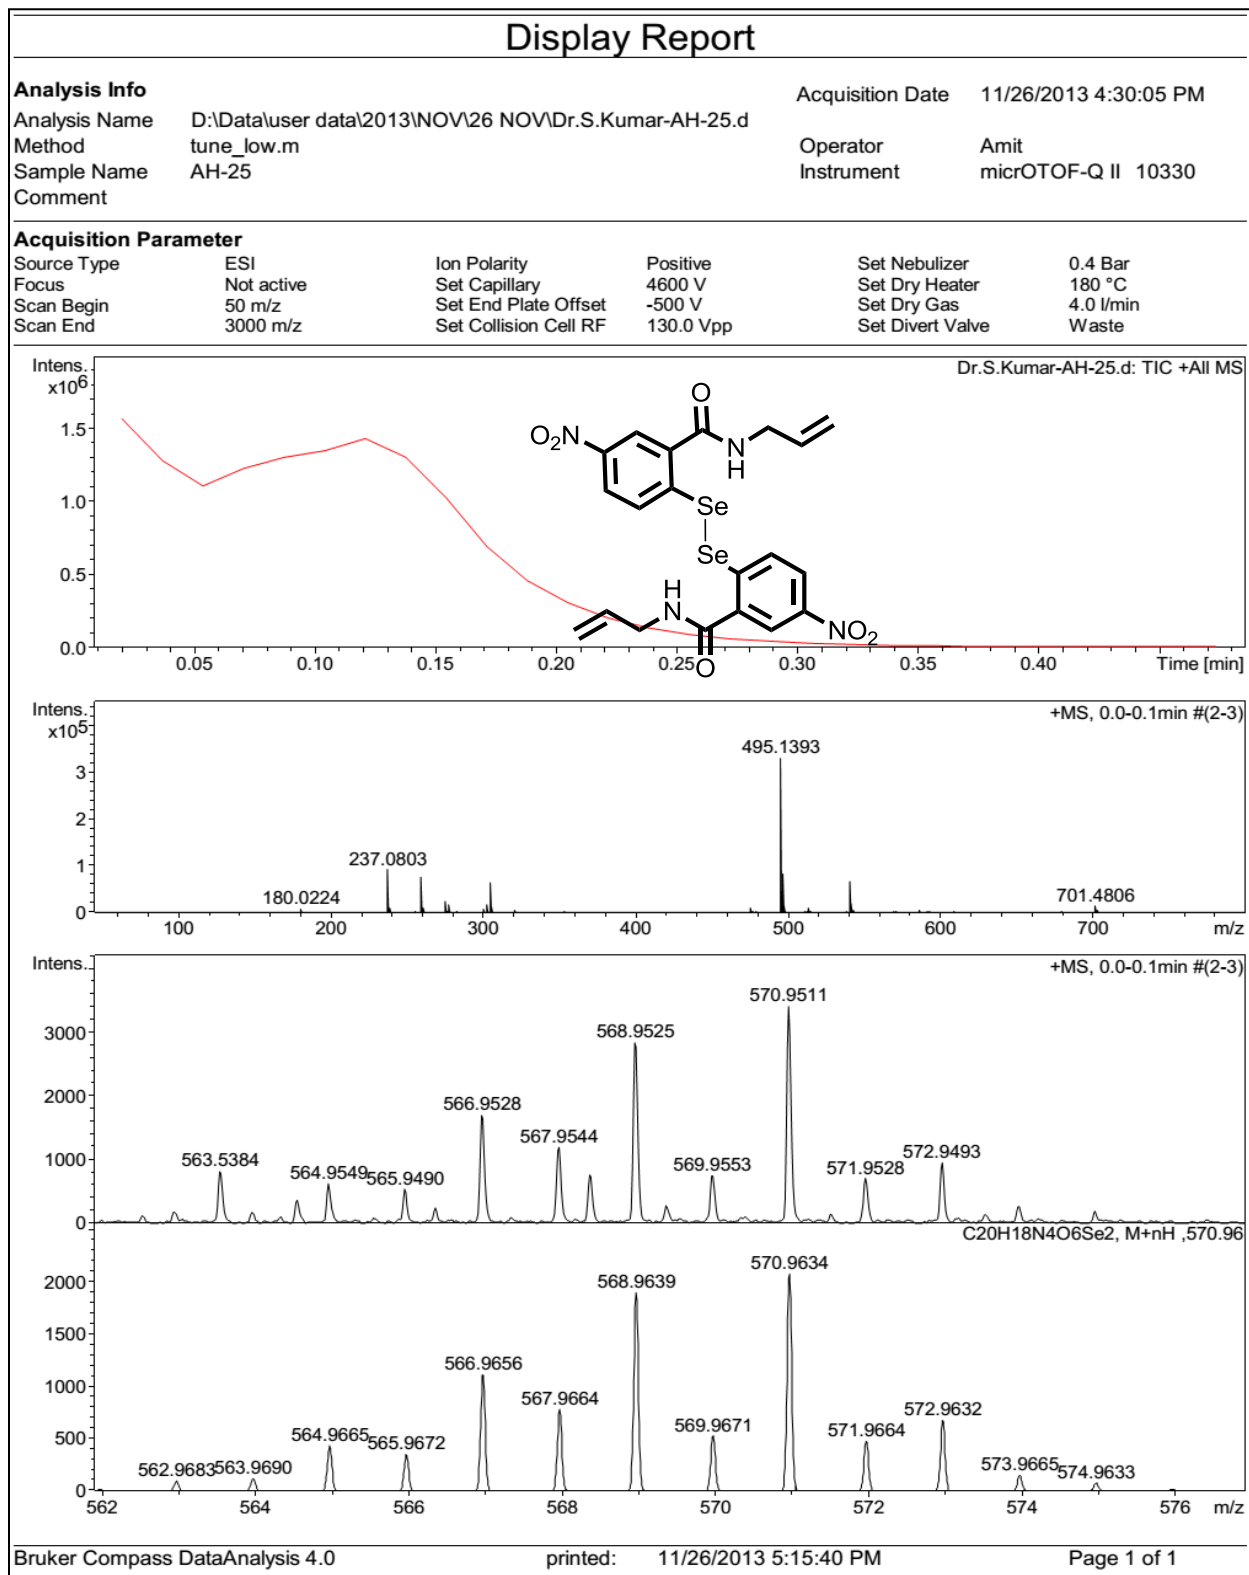

Figure S44. <sup>1</sup>H NMR of **2e**

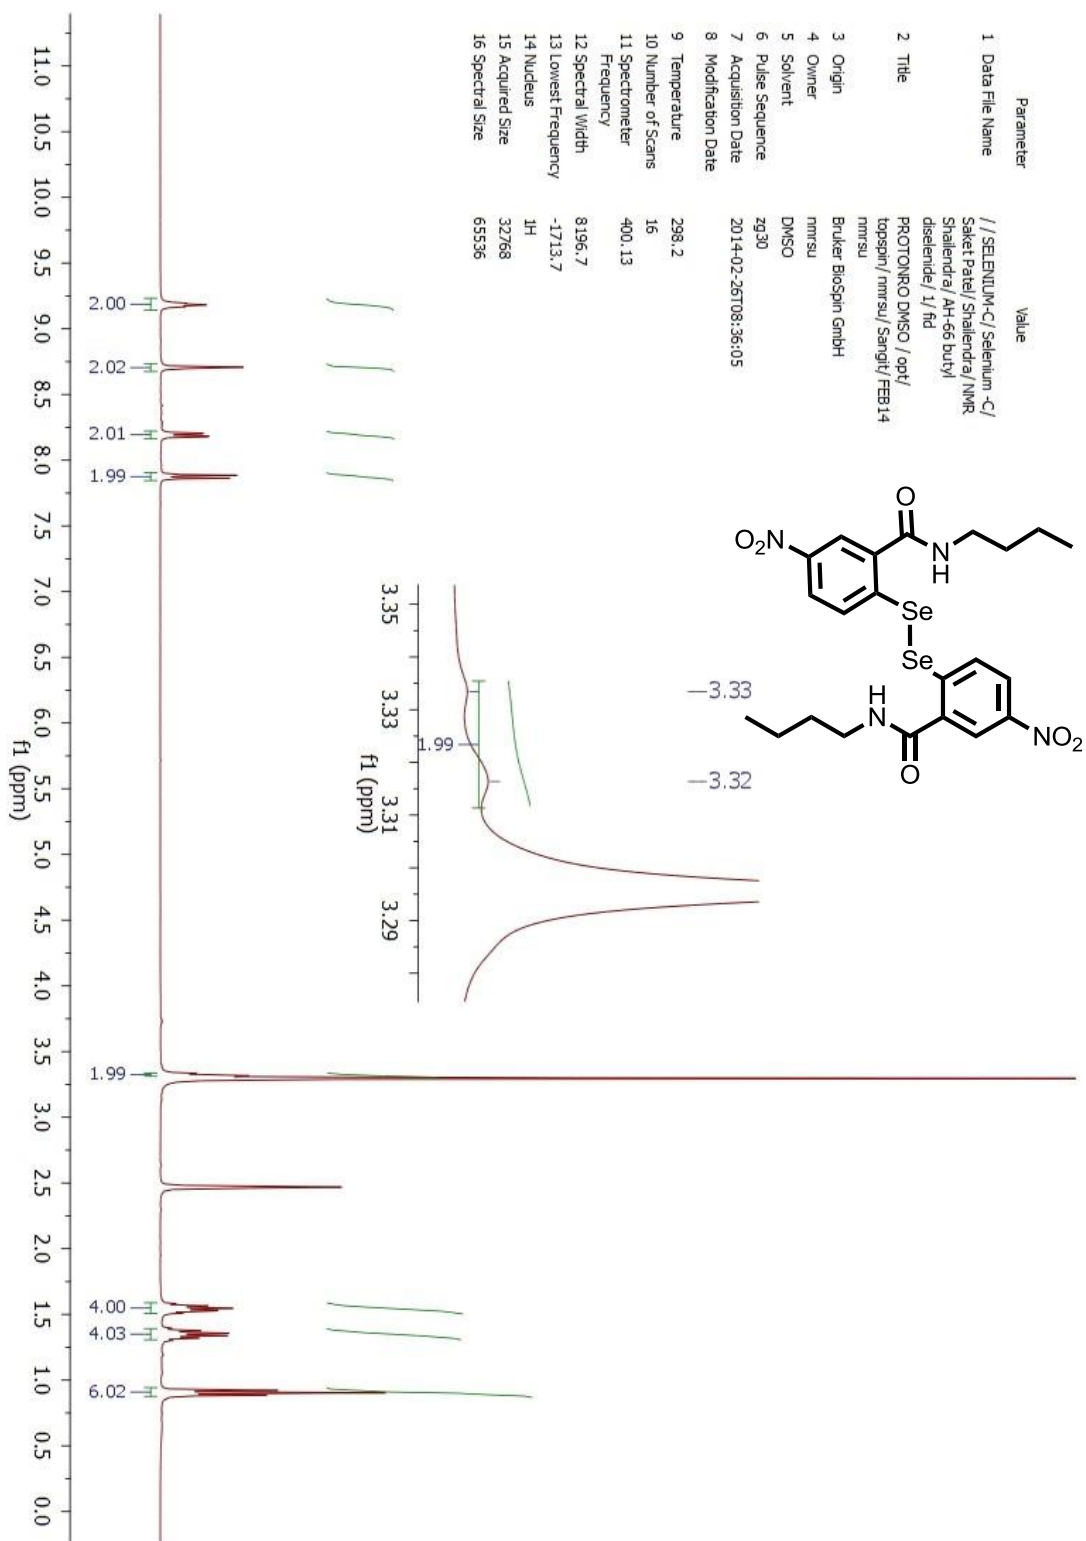

Figure S45. <sup>13</sup>C NMR of **2e**

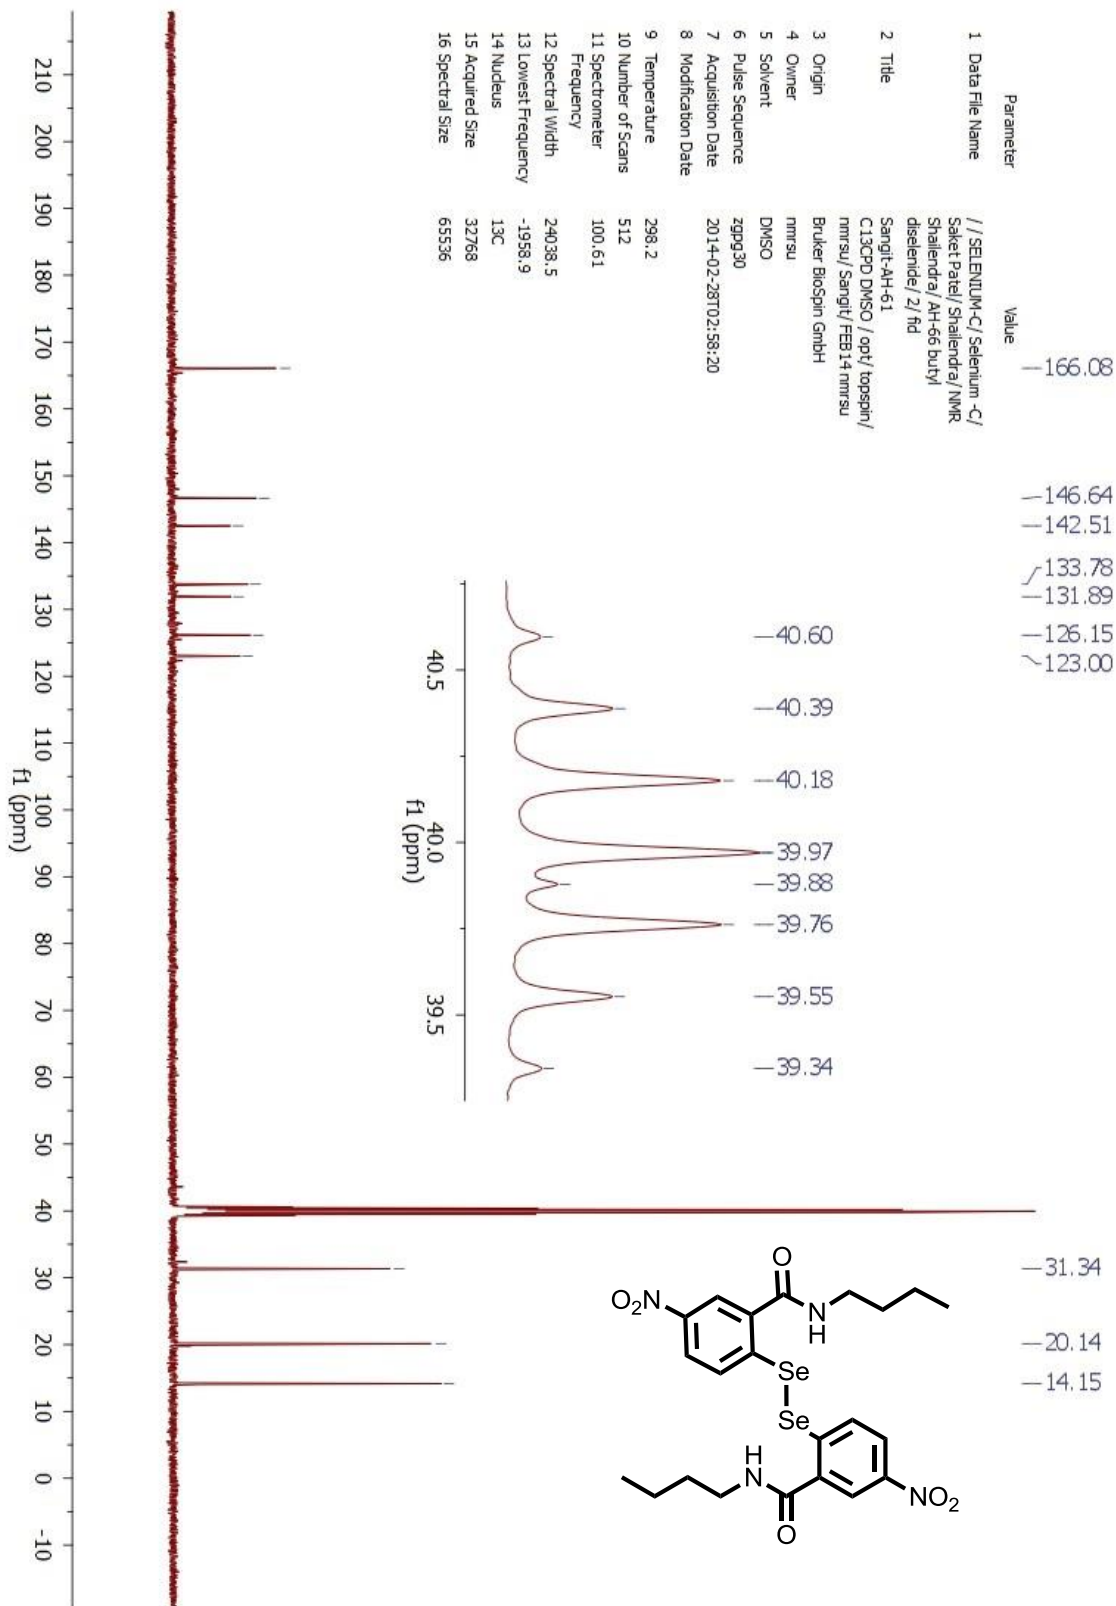

Figure S46.  $^{77}\text{Se}$  NMR of **2e**

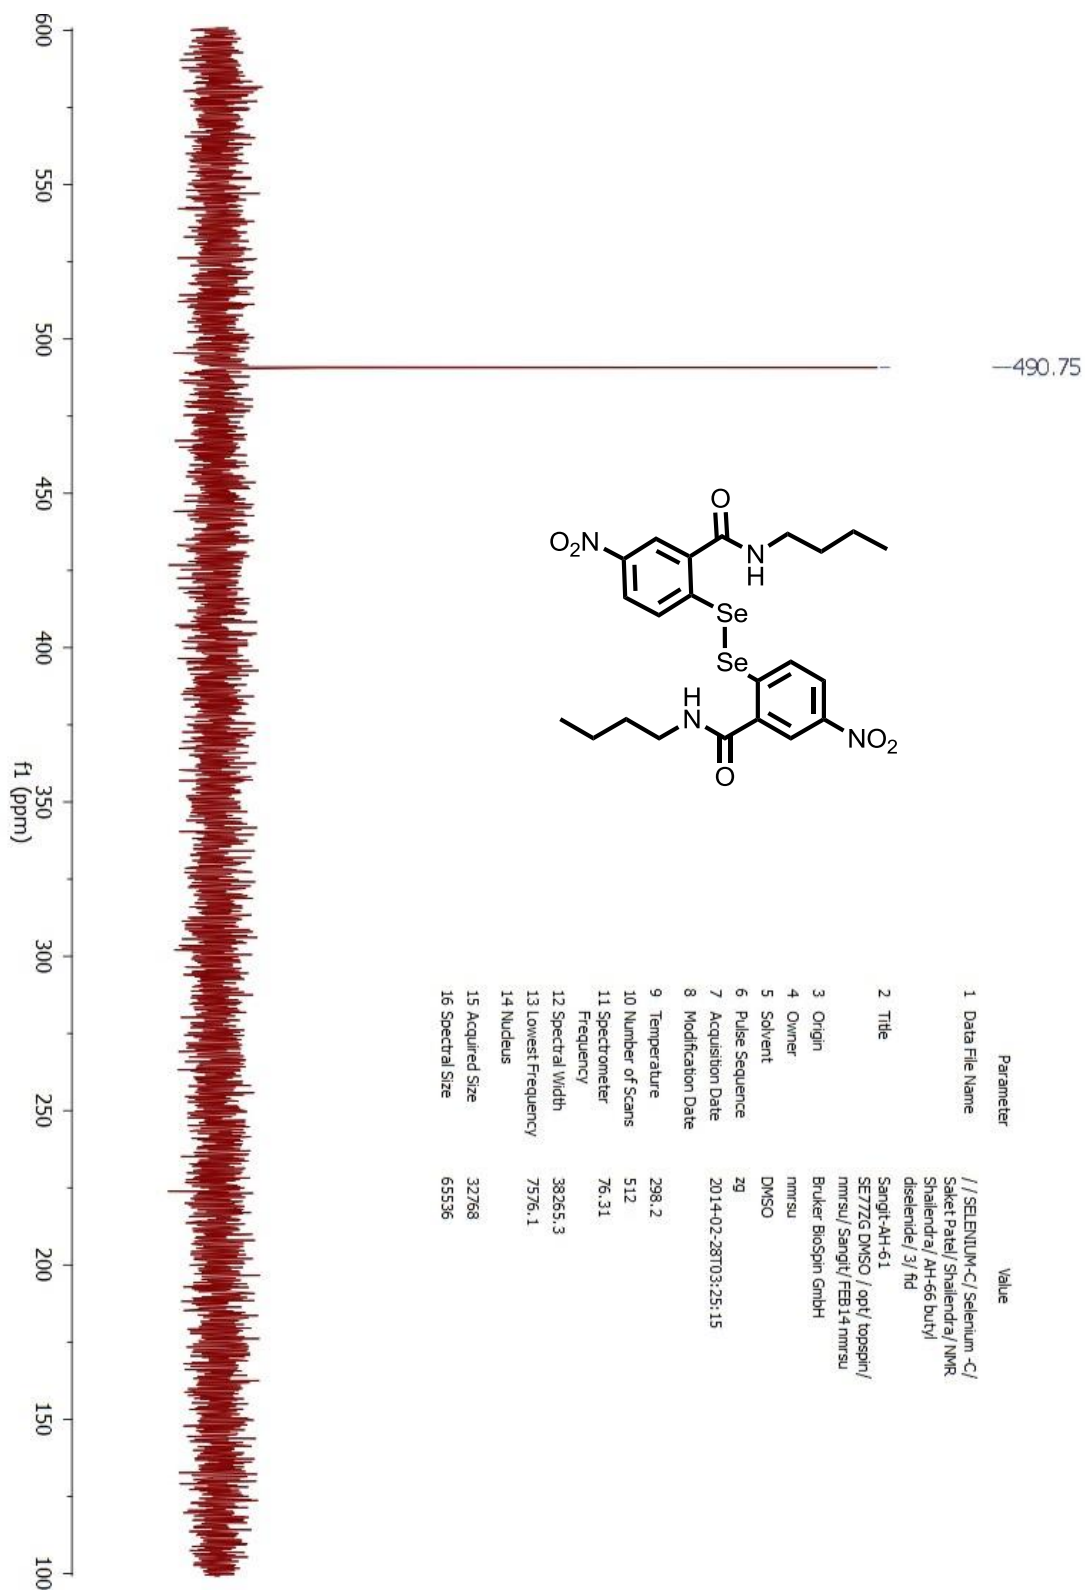



Figure S47.  $^1\text{H}$  NMR of **3d**

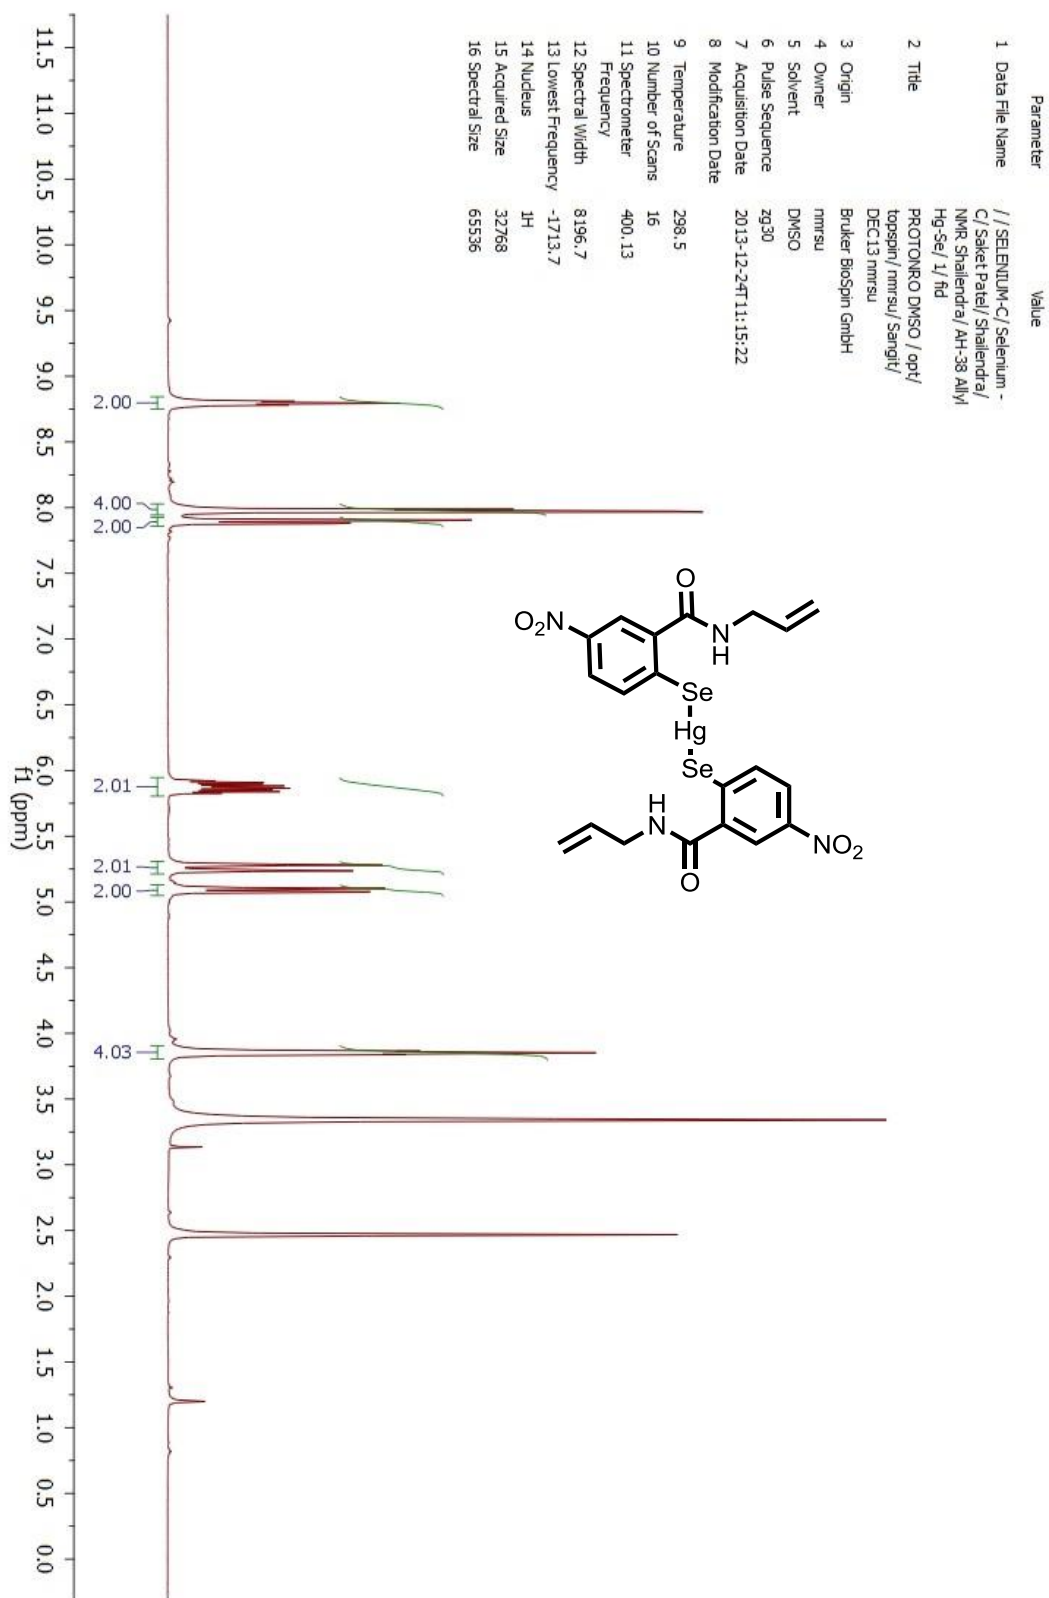

Figure S48.  $^{13}\text{C}$  NMR of **3d**

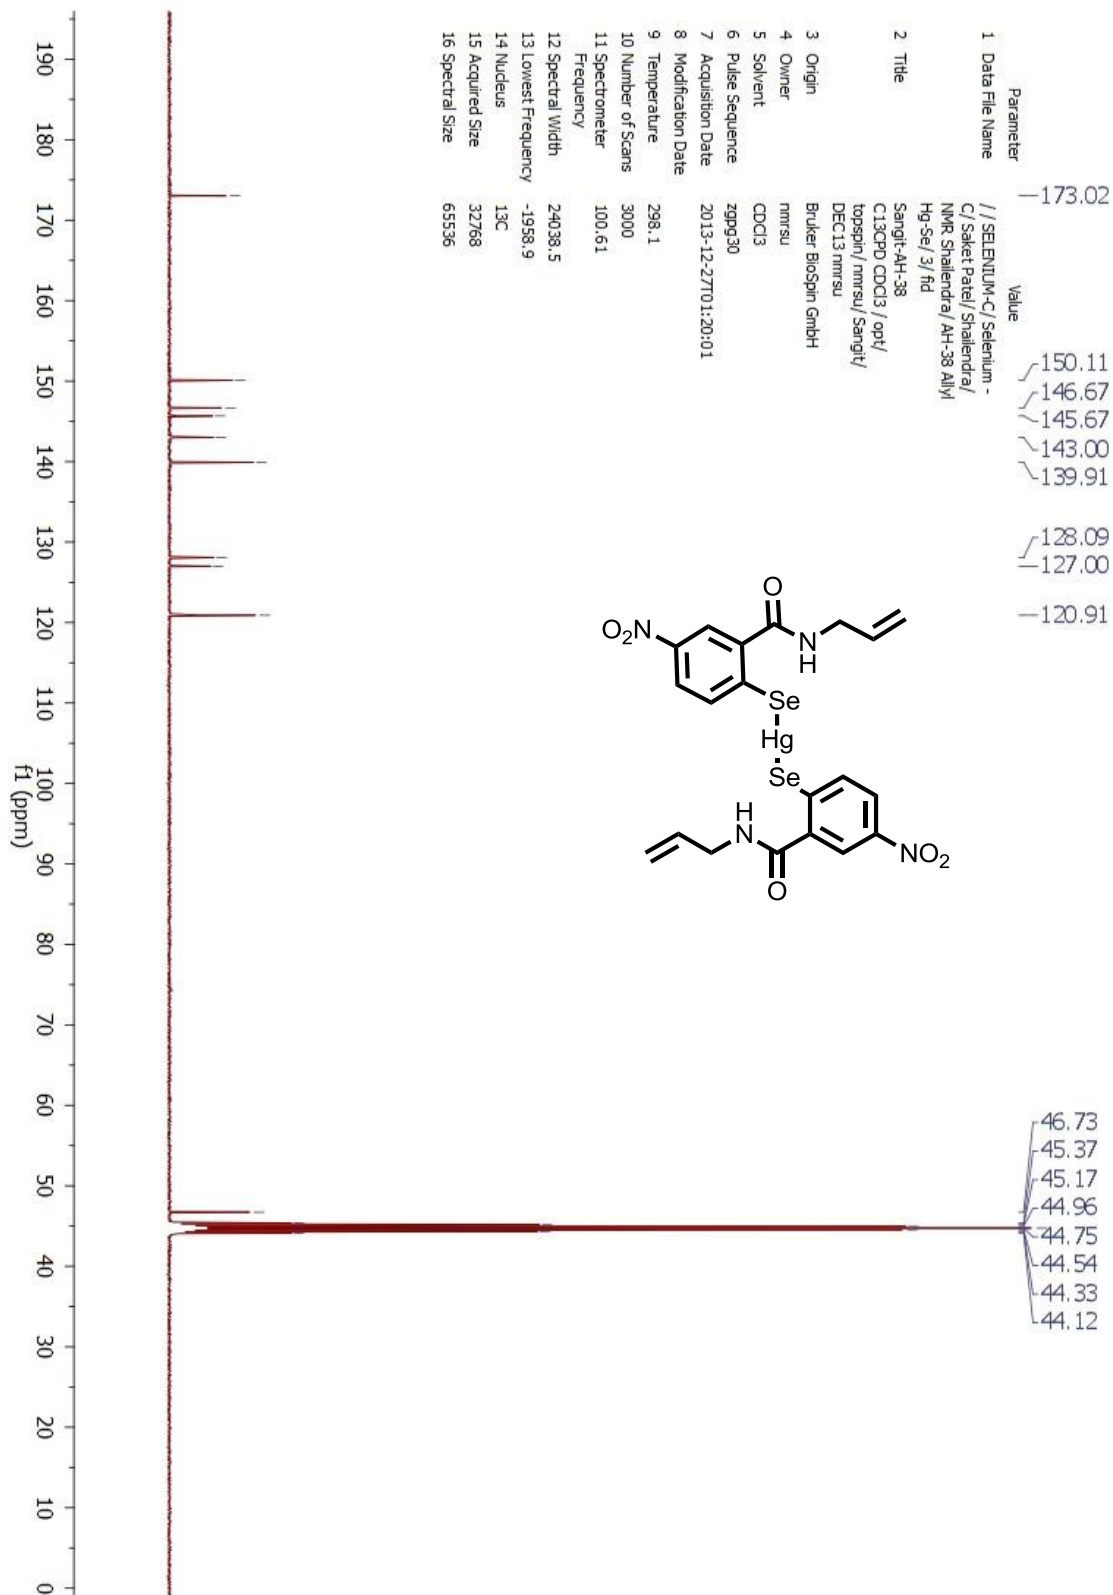

Figure S49. <sup>77</sup>Se NMR of **3d**

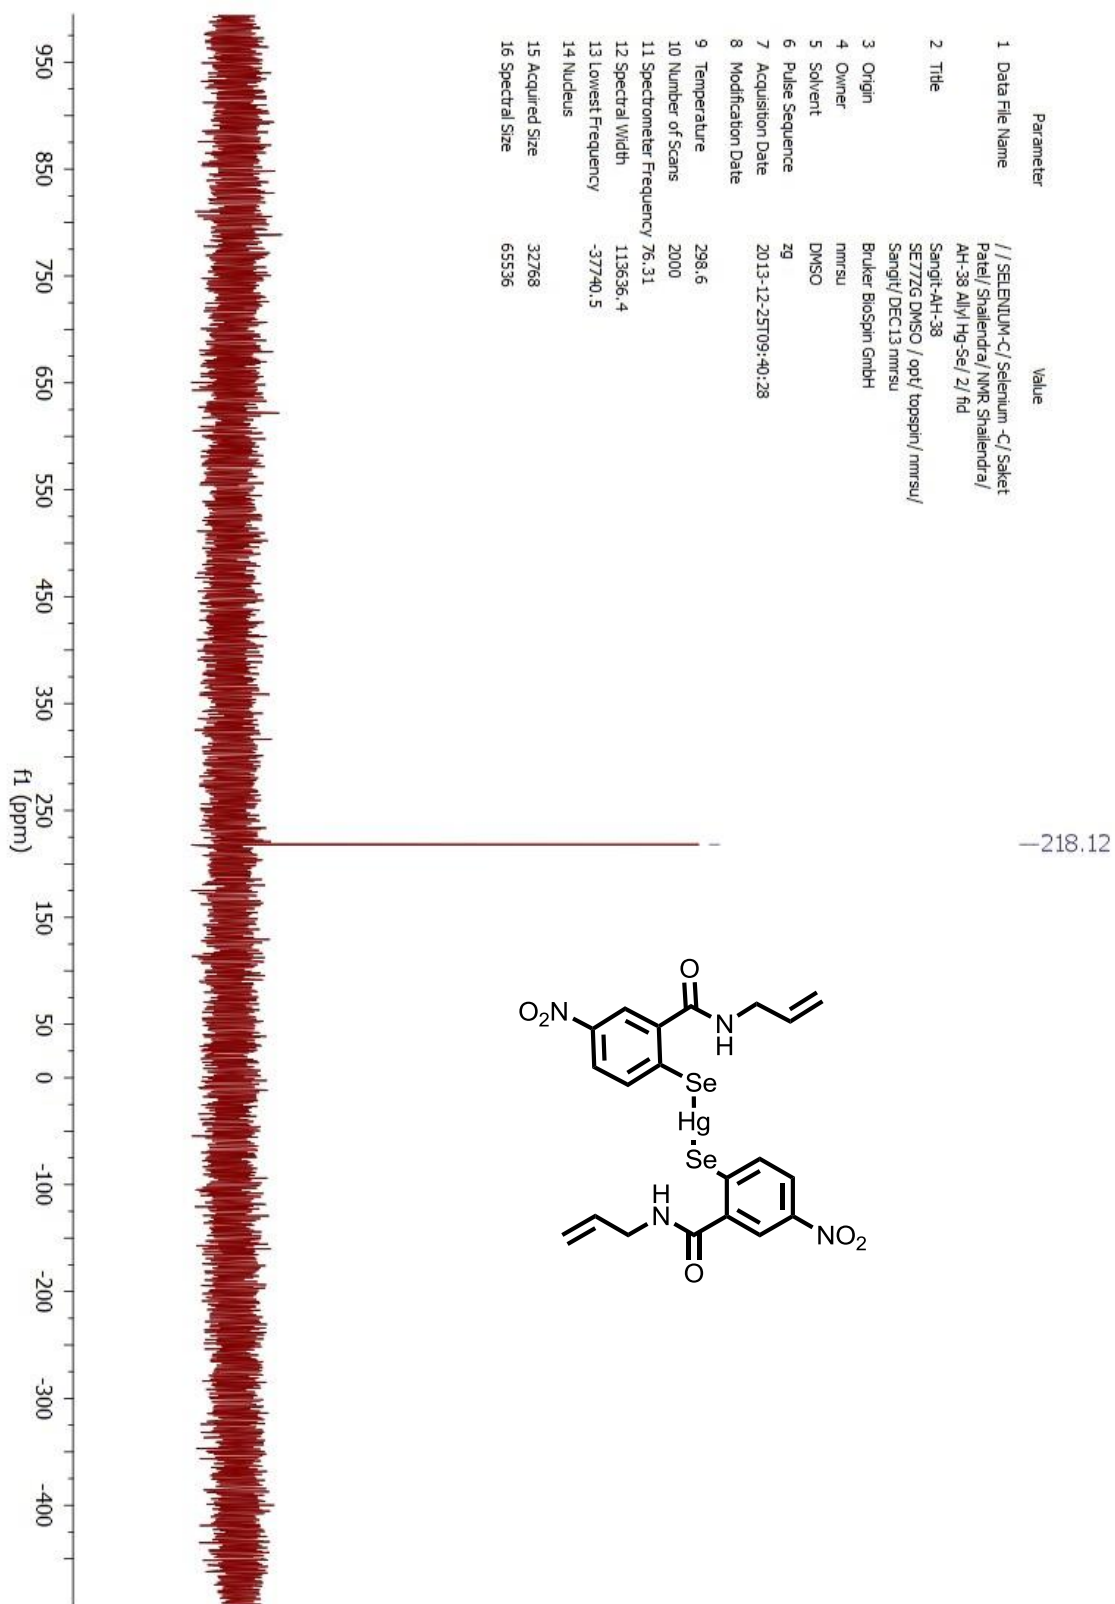

Figure S50. Mass spectrum of **3d**

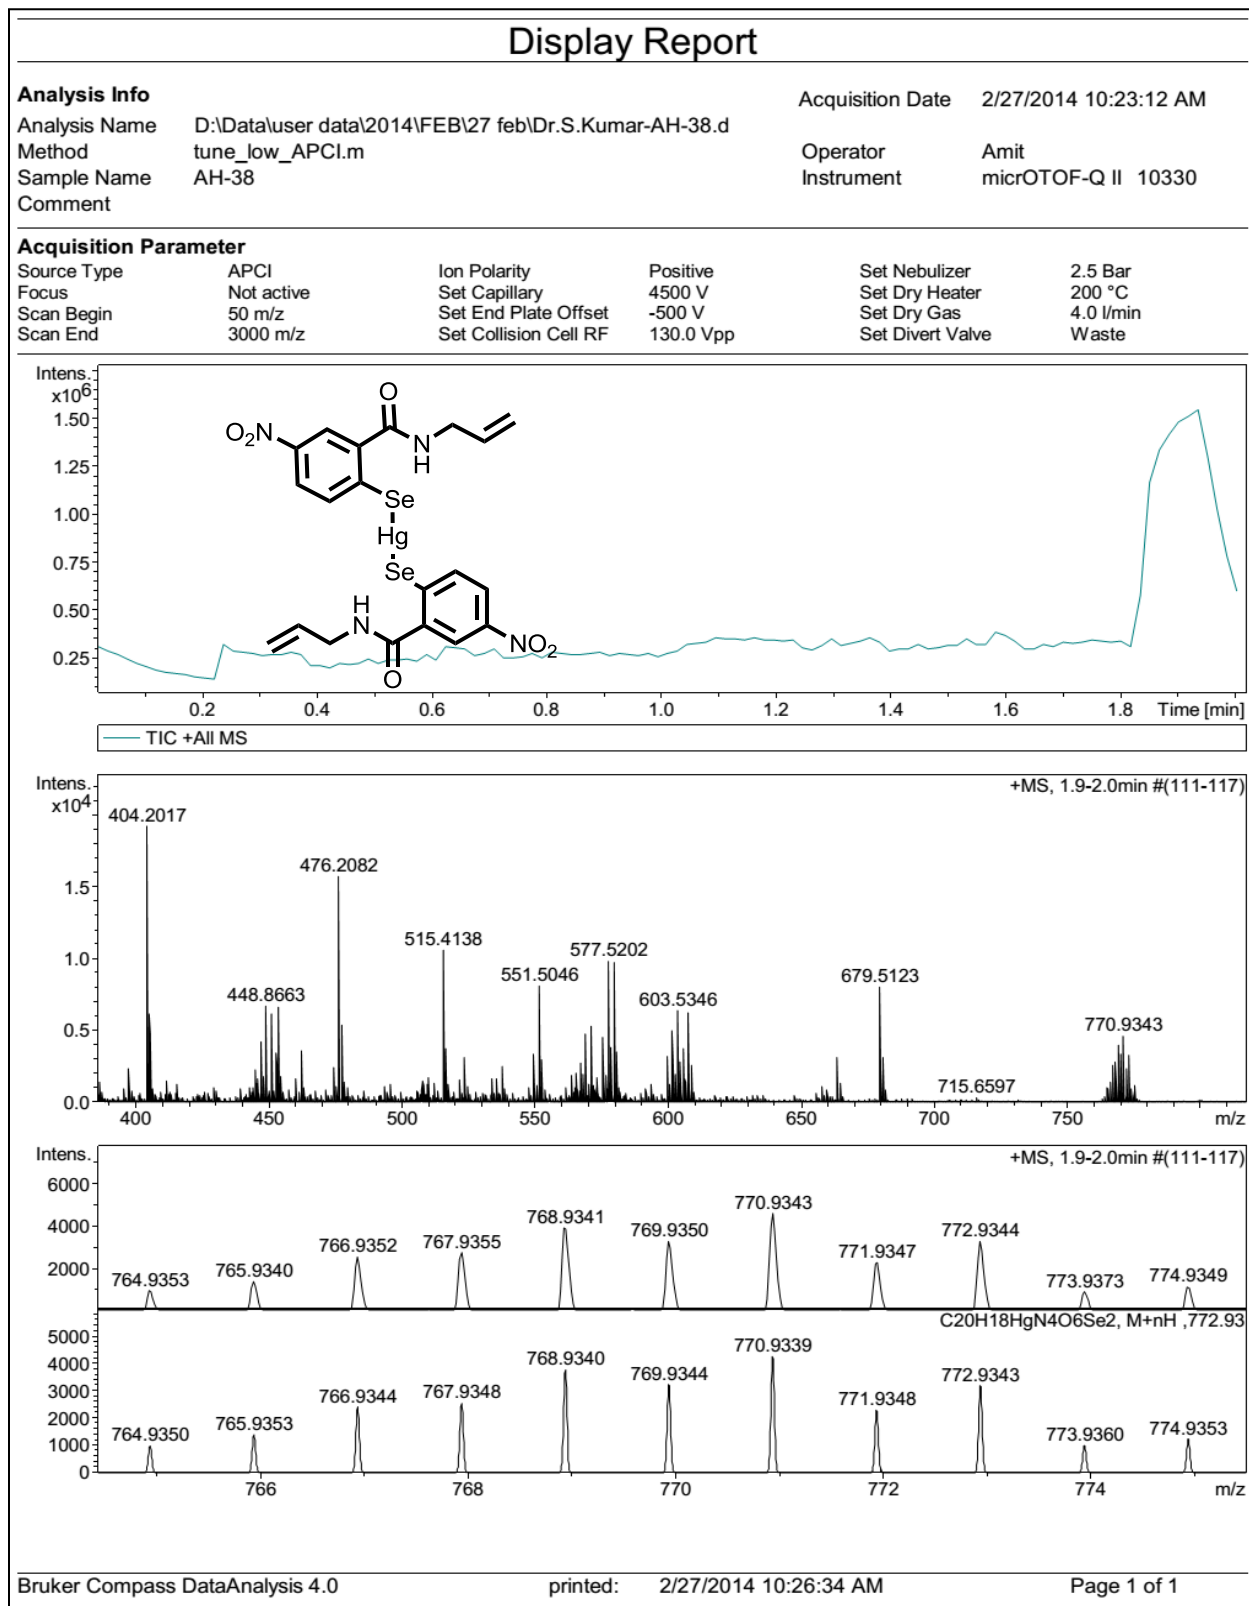

Figure S51. <sup>1</sup>H NMR of **3e**

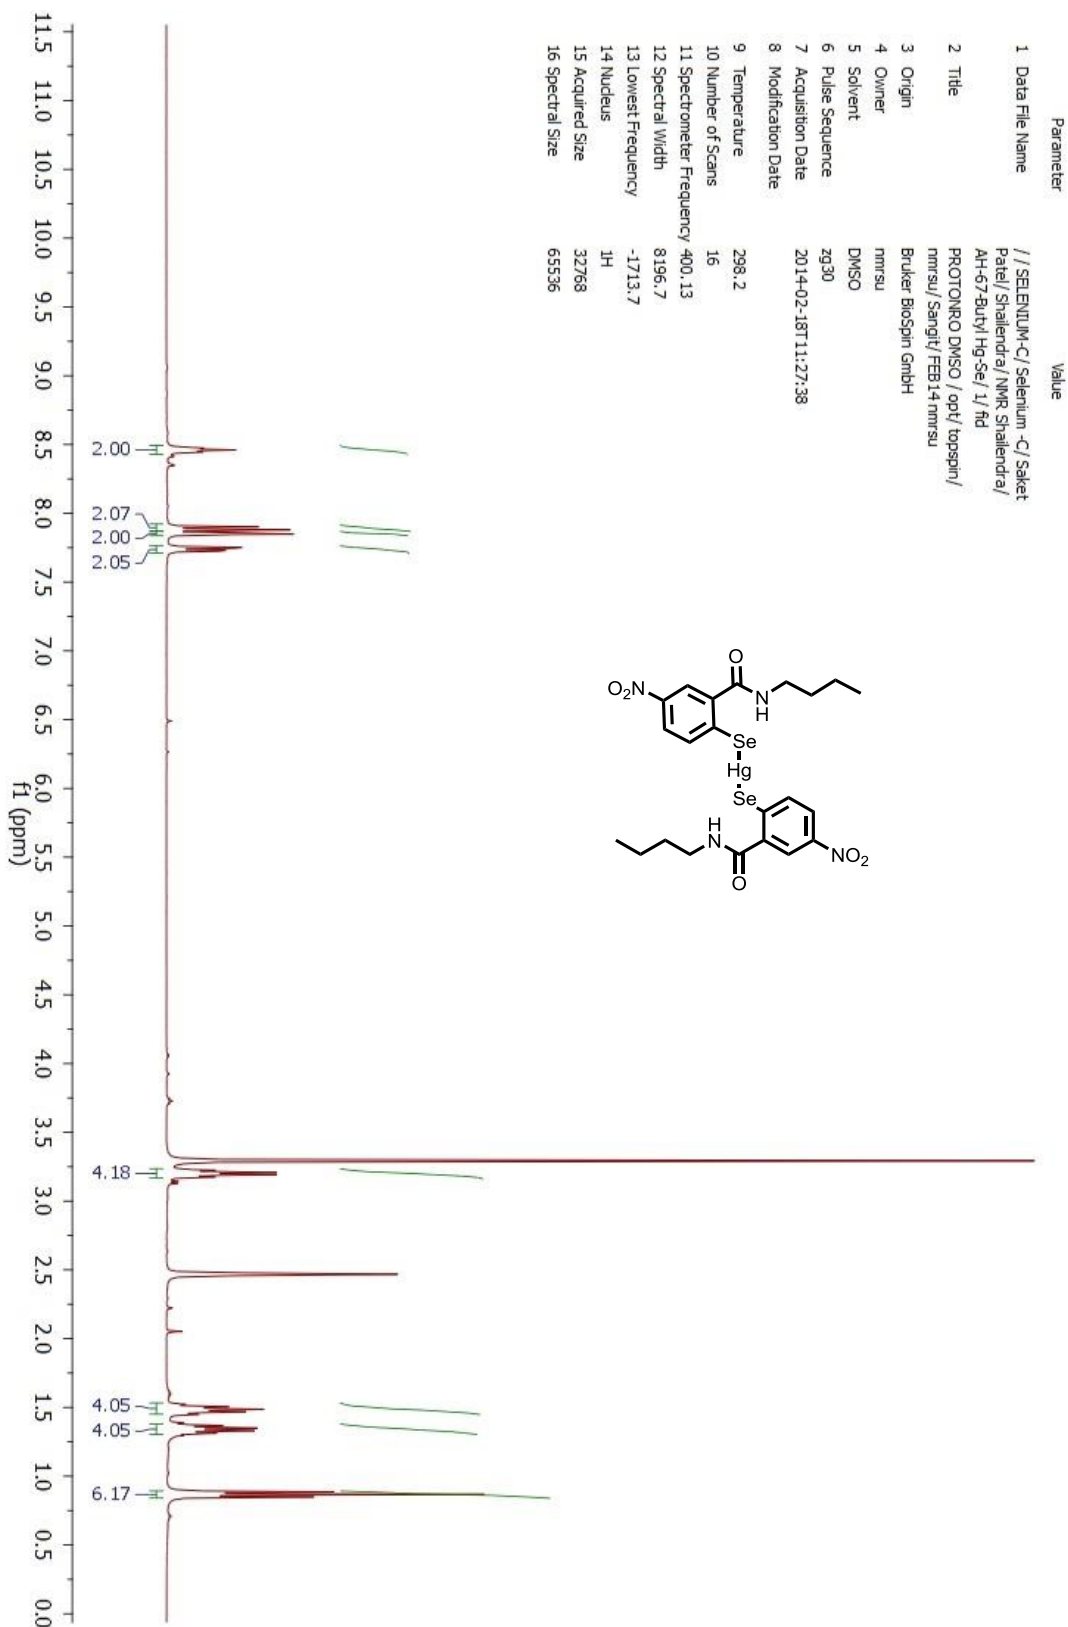

Figure S52. <sup>13</sup>C NMR of **3e**

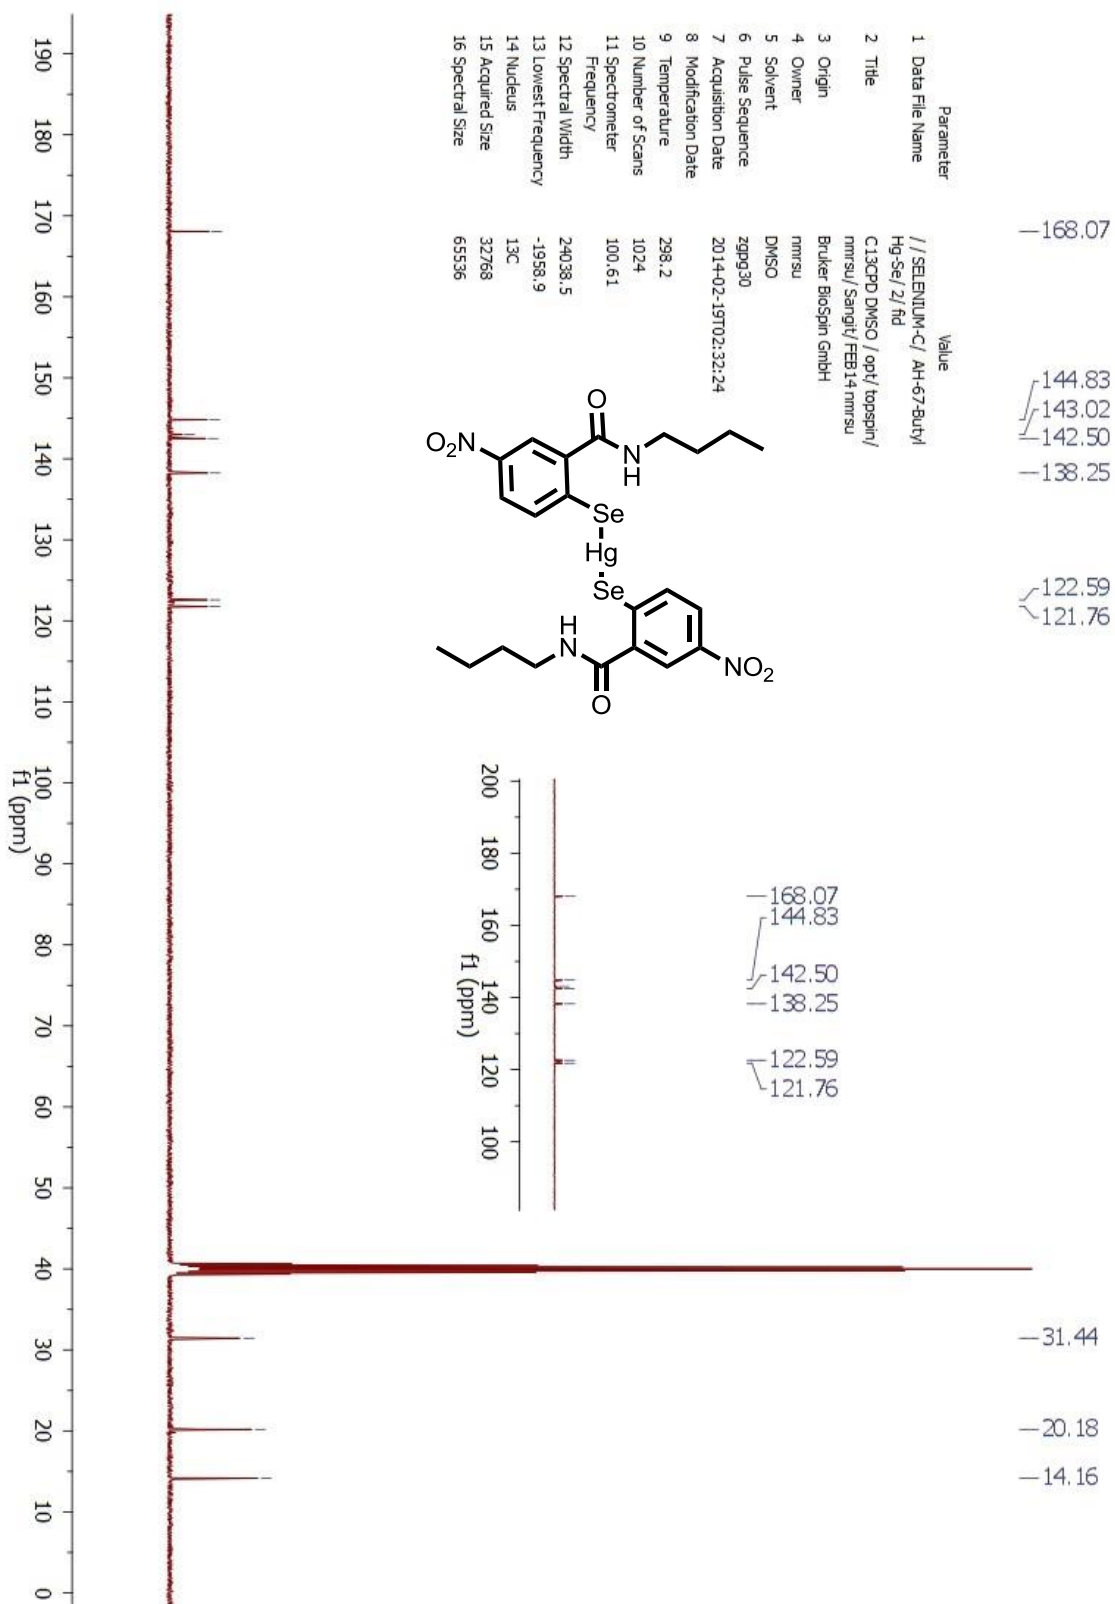

Figure S53.  $^{77}\text{Se}$  NMR of **3e**

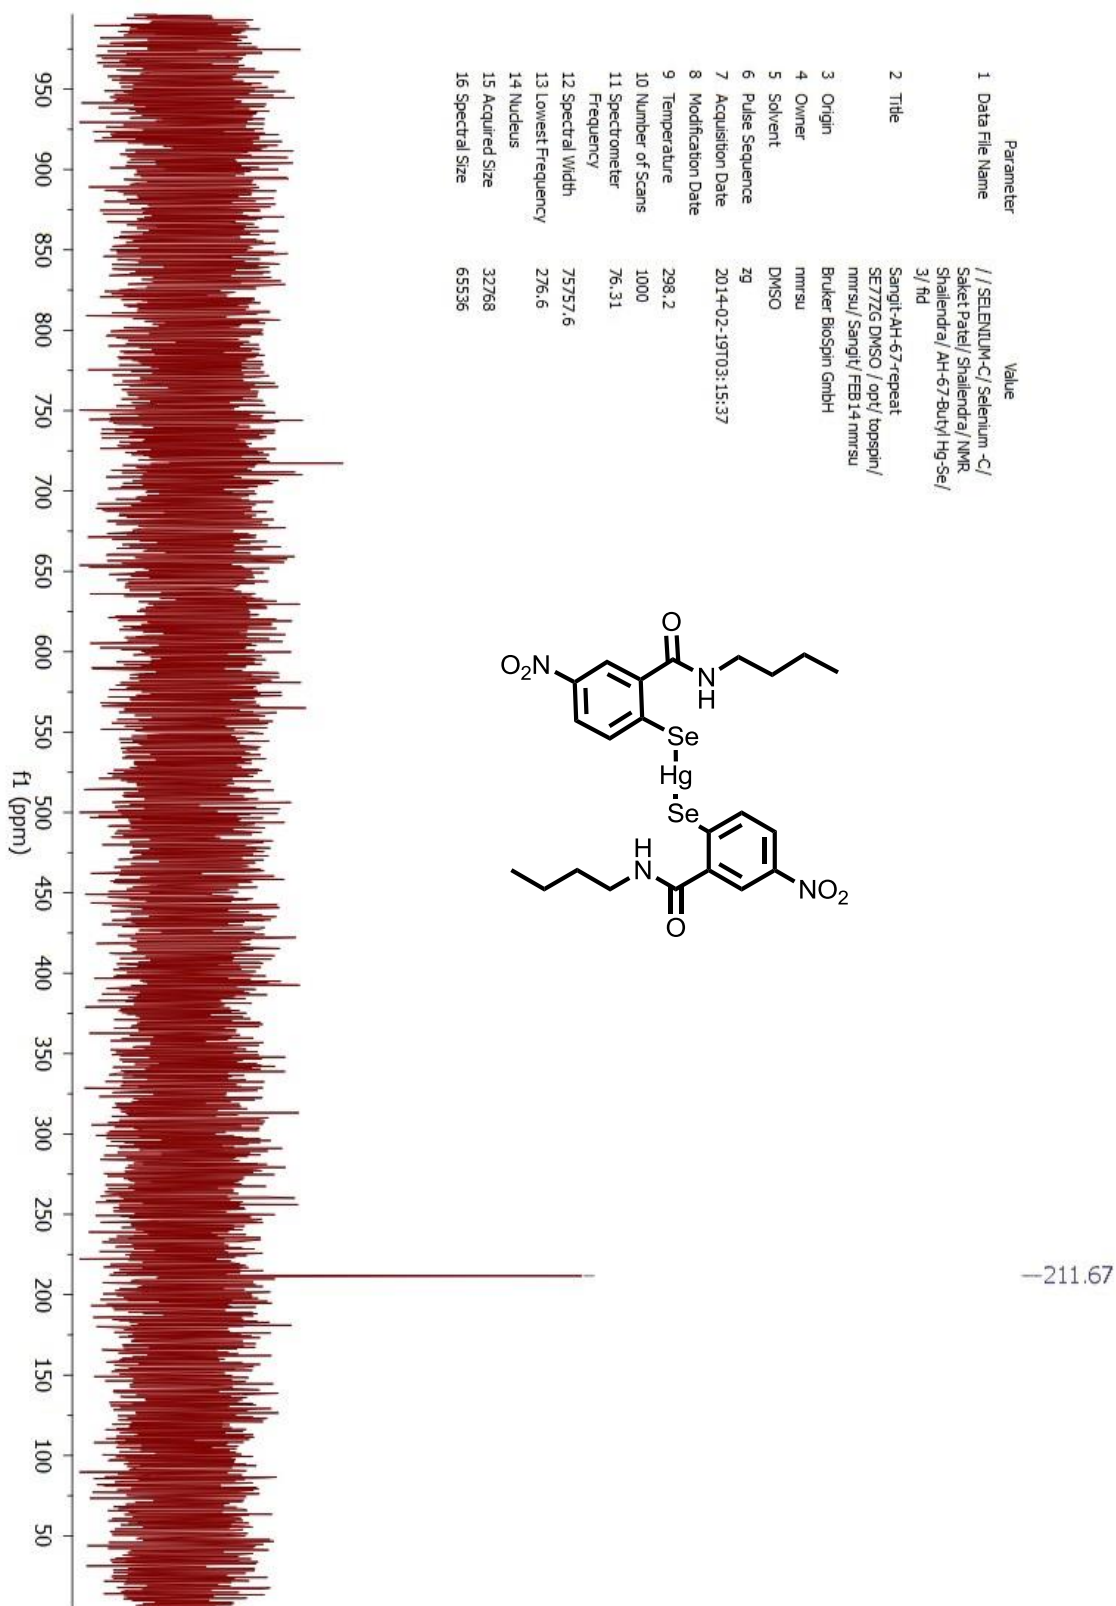

Figure S54. Mass spectrum of **3e**

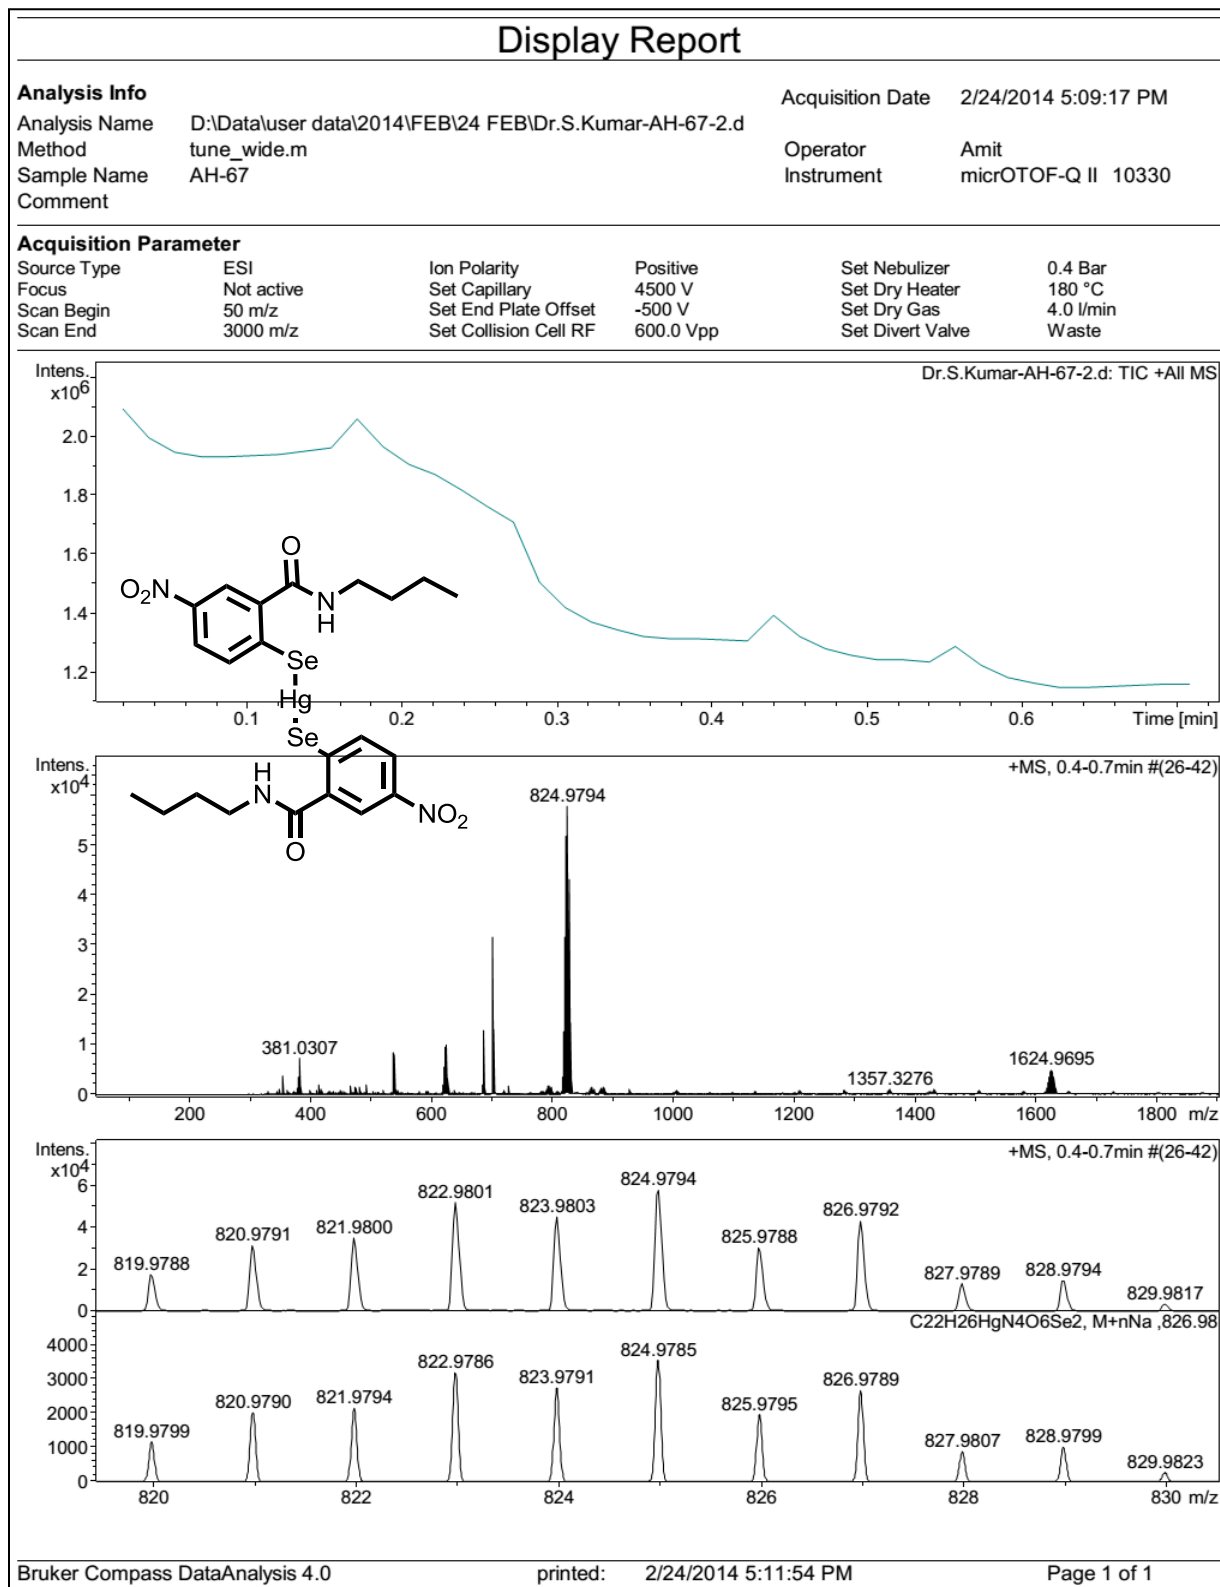



UV-Visible spectra of mercury selenolates (3a, 3c, 3d, 3e) in acetonitrile

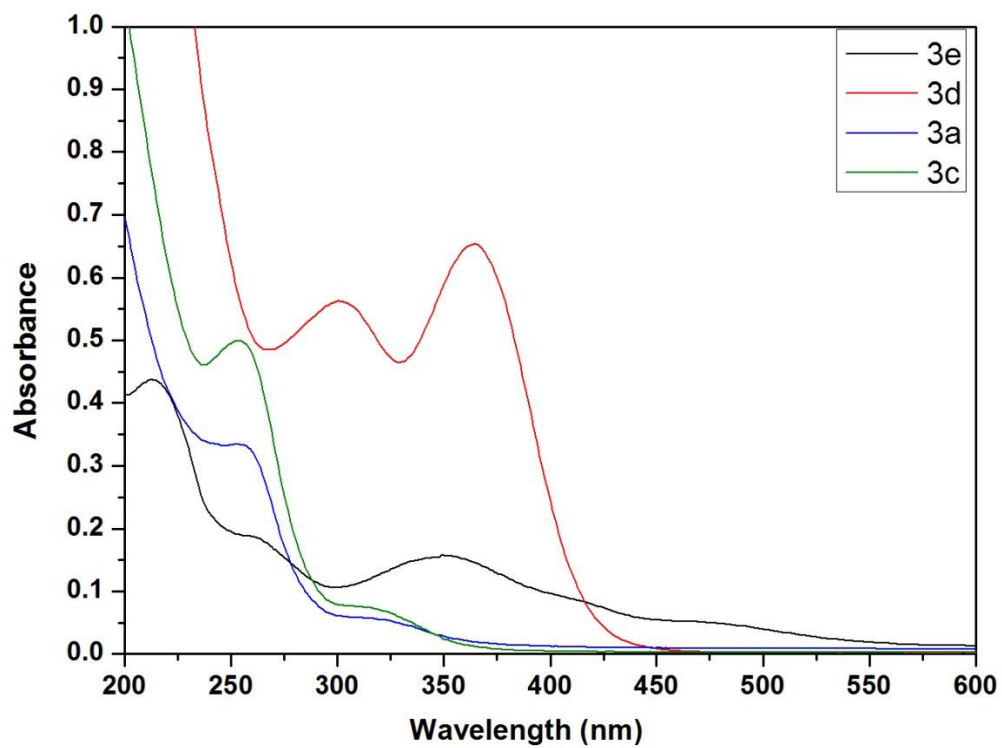

## Crystal structure description

Crystal Structure of bis(*N,N*-dimethylbenzamide) diselenide **2a** with 50% ellipsoidal probability (CCDC No.- 1059010)

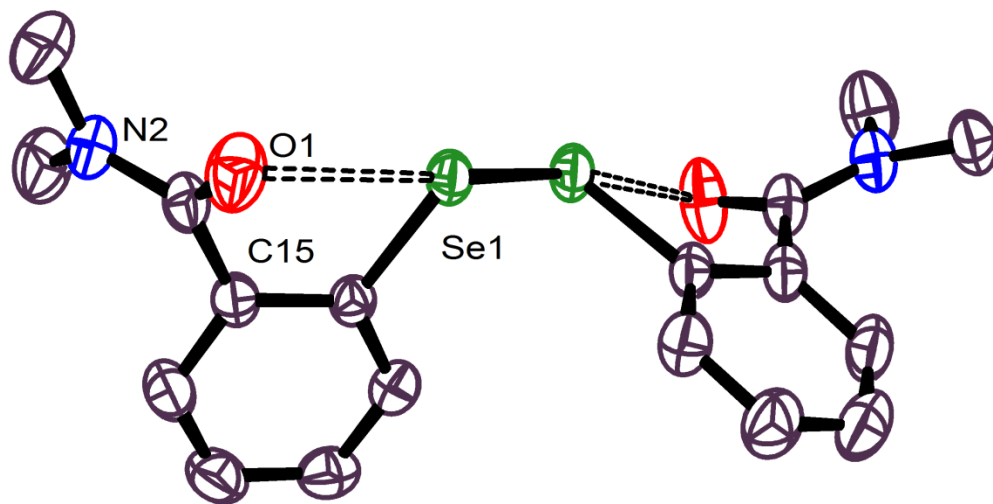

## Packing diagram for **2a**

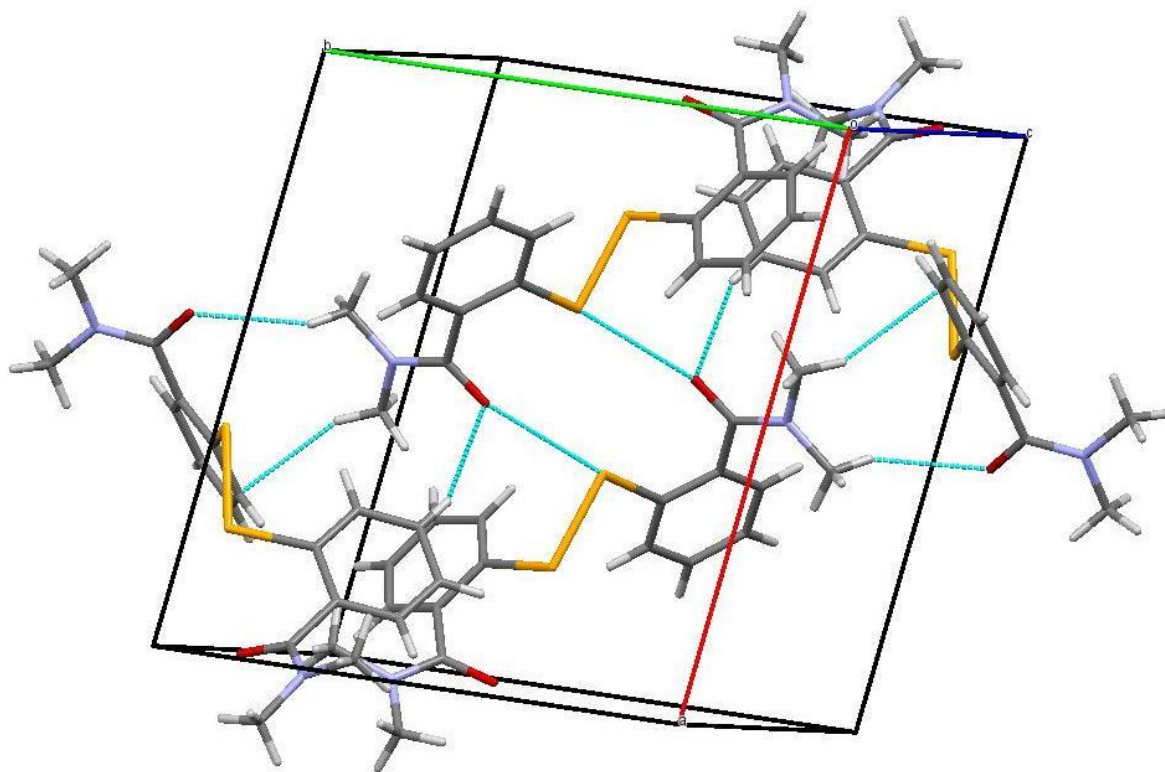

**Table 1. Crystal data and structure refinement for 2a**

|                                   |                                                                               |               |
|-----------------------------------|-------------------------------------------------------------------------------|---------------|
| Identification code               | SAMSDM                                                                        |               |
| Empirical formula                 | C <sub>18</sub> H <sub>20</sub> N <sub>2</sub> O <sub>2</sub> Se <sub>2</sub> |               |
| Formula weight                    | 454.28                                                                        |               |
| Temperature                       | 298 (2) K                                                                     |               |
| Wavelength                        | 0.71073 Å                                                                     |               |
| Crystal system                    | Monoclinic                                                                    |               |
| Space group                       | P 2 <sub>1</sub> /c                                                           |               |
| Unit cell dimensions              | a = 14.2781 (7) Å                                                             | α = 90 °.     |
|                                   | b = 12.1561 (6) Å                                                             | β = 113.62 °. |
|                                   | c = 11.4422 (5) Å                                                             | γ = 90 °.     |
| Volume                            | 1819.58 (15) Å <sup>3</sup>                                                   |               |
| Z                                 | 4                                                                             |               |
| Density (calculated)              | 1.658 g/cm <sup>3</sup>                                                       |               |
| Absorption coefficient            | 4.076 mm <sup>-1</sup>                                                        |               |
| F(000)                            | 904                                                                           |               |
| Theta range for data collection   | 2.23 to 29.56 °.                                                              |               |
| Index ranges                      | -22 ≤ h ≤ 18, -19 ≤ k ≤ 16, -17 ≤ l ≤ 18                                      |               |
| Reflections collected             | 26969                                                                         |               |
| Independent reflections           | 7496 [R(int) = 0.0466]                                                        |               |
| Completeness to theta = 25.242°   | 95.7 %                                                                        |               |
| Absorption correction             | None                                                                          |               |
| Refinement method                 | Full-matrix least-squares on F <sup>2</sup>                                   |               |
| Data / restraints / parameters    | 7496 / 0 / 221                                                                |               |
| Goodness-of-fit on F <sup>2</sup> | 1.012                                                                         |               |
| Final R indices [I > 2σ(I)]       | R1 = 0.0363, wR2 = 0.0803                                                     |               |
| R indices (all data)              | R1 = 0.0771, wR2 = 0.0919                                                     |               |
| Extinction coefficient            | n/a                                                                           |               |
| Largest diff. peak and hole       | 0.569 and -0.452 e.Å <sup>-3</sup>                                            |               |

**Table 2. Atomic coordinates and equivalent isotropic displacement parameters ( $\text{\AA}^2$ ) for 2a.****U(eq) is defined as one third of the trace of the orthogonalized  $U^{ij}$  tensor.**

|      | x            | y            | z            | Uiso*/Ueq   |
|------|--------------|--------------|--------------|-------------|
| Se1  | 0.63360 (2)  | 0.47574 (2)  | 0.62884 (2)  | 0.03734 (6) |
| Se2  | 0.79678 (2)  | 0.52563 (2)  | 0.65017 (2)  | 0.04029 (6) |
| O1   | 0.45954 (11) | 0.35325 (12) | 0.61730 (14) | 0.0581 (4)  |
| O2   | 0.99804 (12) | 0.59398 (12) | 0.71361 (18) | 0.0657 (4)  |
| C8   | 0.66744 (13) | 0.40791 (12) | 0.79424 (15) | 0.0315 (3)  |
| C1   | 0.80845 (14) | 0.67467 (14) | 0.71526 (16) | 0.0369 (4)  |
| C2   | 0.74021 (15) | 0.71649 (16) | 0.76001 (19) | 0.0465 (5)  |
| H2   | 0.6835       | 0.6750       | 0.7531       | 0.056*      |
| C3   | 0.75442 (19) | 0.82008 (17) | 0.8156 (2)   | 0.0590 (6)  |
| H3   | 0.7080       | 0.8473       | 0.8466       | 0.071*      |
| C4   | 0.8376 (2)   | 0.88220 (18) | 0.8246 (2)   | 0.0661 (7)  |
| H4   | 0.8484       | 0.9507       | 0.8639       | 0.079*      |
| C5   | 0.90460 (17) | 0.84312 (16) | 0.7754 (2)   | 0.0532 (5)  |
| H5   | 0.9593       | 0.8866       | 0.7792       | 0.064*      |
| C6   | 0.89151 (14) | 0.73861 (14) | 0.71964 (17) | 0.0396 (4)  |
| C7   | 0.97092 (14) | 0.68949 (15) | 0.68175 (19) | 0.0426 (4)  |
| N1   | 1.01426 (12) | 0.74999 (13) | 0.61970 (15) | 0.0467 (4)  |
| C9   | 1.09851 (18) | 0.7017 (2)   | 0.5965 (3)   | 0.0696 (7)  |
| H9A  | 1.1038       | 0.6249       | 0.6177       | 0.104*      |
| H9B  | 1.1611       | 0.7381       | 0.6484       | 0.104*      |
| H9C  | 1.0863       | 0.7102       | 0.5082       | 0.104*      |
| C10  | 0.97565 (18) | 0.85530 (17) | 0.5572 (2)   | 0.0572 (6)  |
| H10A | 0.9055       | 0.8639       | 0.5451       | 0.086*      |
| H10B | 0.9805       | 0.8570       | 0.4759       | 0.086*      |
| H10C | 1.0156       | 0.9141       | 0.6096       | 0.086*      |

|      |              |              |              |            |
|------|--------------|--------------|--------------|------------|
| C11  | 0.74728 (14) | 0.44452 (15) | 0.90303 (18) | 0.0392 (4) |
| H11  | 0.7886       | 0.5013       | 0.8965       | 0.047*     |
| C12  | 0.76723 (16) | 0.39907 (17) | 1.02069 (18) | 0.0466 (5) |
| H12  | 0.8218       | 0.4243       | 1.0926       | 0.056*     |
| C13  | 0.70529 (17) | 0.31544 (19) | 1.03081 (19) | 0.0528 (5) |
| H13  | 0.7172       | 0.2851       | 1.1101       | 0.063*     |
| C14  | 0.62546 (16) | 0.27681 (17) | 0.92261 (18) | 0.0483 (5) |
| H14  | 0.5841       | 0.2206       | 0.9302       | 0.058*     |
| C15  | 0.60634 (13) | 0.32058 (14) | 0.80356 (16) | 0.0350 (4) |
| C16  | 0.51829 (14) | 0.28383 (15) | 0.68629 (18) | 0.0398 (4) |
| N2   | 0.50572 (14) | 0.17657 (13) | 0.65818 (17) | 0.0503 (4) |
| C18  | 0.5783 (2)   | 0.08980 (17) | 0.7237 (3)   | 0.0697 (7) |
| H18A | 0.6406       | 0.1221       | 0.7828       | 0.105*     |
| H18B | 0.5923       | 0.0466       | 0.6624       | 0.105*     |
| H18C | 0.5497       | 0.0436       | 0.7691       | 0.105*     |
| C19  | 0.4198 (2)   | 0.1432 (2)   | 0.5427 (2)   | 0.0757 (8) |
| H19A | 0.3667       | 0.1975       | 0.5212       | 0.114*     |
| H19B | 0.3941       | 0.0736       | 0.5568       | 0.114*     |
| H19C | 0.4418       | 0.1364       | 0.4741       | 0.114*     |

\* Hydrogens are treated anisotropically

**Table 3. Selected bond lengths [ $\text{\AA}$ ] for 2a.**

|         |             |          |           |
|---------|-------------|----------|-----------|
| Se1—C8  | 1.9396 (16) | C9—H9C   | 0.9600    |
| Se1—Se2 | 2.3237 (3)  | C10—H10A | 0.9600    |
| Se2—C1  | 1.9404 (17) | C10—H10B | 0.9600    |
| O1—C16  | 1.228 (2)   | C10—H10C | 0.9600    |
| O2—C7   | 1.232 (2)   | C11—C12  | 1.375 (3) |
| C8—C11  | 1.382 (2)   | C11—H11  | 0.9300    |

|        |           |          |           |
|--------|-----------|----------|-----------|
| C8—C15 | 1.405 (2) | C12—C13  | 1.382 (3) |
| C1—C2  | 1.367 (3) | C12—H12  | 0.9300    |
| C1—C6  | 1.402 (2) | C13—C14  | 1.386 (3) |
| C2—C3  | 1.389 (3) | C13—H13  | 0.9300    |
| C2—H2  | 0.9300    | C14—C15  | 1.384 (2) |
| C3—C4  | 1.376 (3) | C14—H14  | 0.9300    |
| C3—H3  | 0.9300    | C15—C16  | 1.493 (2) |
| C4—C5  | 1.375 (3) | C16—N2   | 1.338 (2) |
| C4—H4  | 0.9300    | N2—C19   | 1.455 (3) |
| C5—C6  | 1.400 (3) | N2—C18   | 1.458 (3) |
| C5—H5  | 0.9300    | C18—H18A | 0.9600    |
| C6—C7  | 1.491 (3) | C18—H18B | 0.9600    |
| C7—N1  | 1.334 (2) | C18—H18C | 0.9600    |
| N1—C9  | 1.455 (3) | C19—H19A | 0.9600    |
| N1—C10 | 1.462 (2) | C19—H19B | 0.9600    |
| C9—H9A | 0.9600    | C19—H19C | 0.9600    |
| C9—H9B | 0.9600    |          |           |

**Table 4. Selected Bond angles [°] for 2a.**

|            |             |               |             |
|------------|-------------|---------------|-------------|
| C8—Se1—Se2 | 99.28 (5)   | H10A—C10—H10B | 109.5       |
| C1—Se2—Se1 | 102.26 (5)  | N1—C10—H10C   | 109.5       |
| C11—C8—C15 | 119.21 (16) | H10A—C10—H10C | 109.5       |
| C11—C8—Se1 | 122.35 (13) | H10B—C10—H10C | 109.5       |
| C15—C8—Se1 | 118.41 (12) | C12—C11—C8    | 121.66 (18) |
| C2—C1—C6   | 119.99 (17) | C12—C11—H11   | 119.2       |
| C2—C1—Se2  | 121.76 (14) | C8—C11—H11    | 119.2       |

|           |             |             |             |
|-----------|-------------|-------------|-------------|
| C6—C1—Se2 | 118.21 (14) | C11—C12—C13 | 119.27 (19) |
| C1—C2—C3  | 120.9 (2)   | C11—C12—H12 | 120.4       |
| C1—C2—H2  | 119.6       | C13—C12—H12 | 120.4       |
| C3—C2—H2  | 119.6       | C12—C13—C14 | 119.93 (18) |
| C4—C3—C2  | 119.7 (2)   | C12—C13—H13 | 120.0       |
| C4—C3—H3  | 120.2       | C14—C13—H13 | 120.0       |
| C2—C3—H3  | 120.2       | C15—C14—C13 | 121.08 (18) |
| C5—C4—C3  | 120.1 (2)   | C15—C14—H14 | 119.5       |
| C5—C4—H4  | 120.0       | C13—C14—H14 | 119.5       |
| C3—C4—H4  | 120.0       | C14—C15—C8  | 118.79 (16) |
| C4—C5—C6  | 120.8 (2)   | C14—C15—C16 | 122.18 (16) |
| C4—C5—H5  | 119.6       | C8—C15—C16  | 118.87 (15) |
| C6—C5—H5  | 119.6       | O1—C16—N2   | 121.59 (18) |
| C5—C6—C1  | 118.43 (19) | O1—C16—C15  | 118.98 (16) |
| C5—C6—C7  | 121.16 (18) | N2—C16—C15  | 119.43 (18) |
| C1—C6—C7  | 119.89 (16) | C16—N2—C19  | 118.3 (2)   |
| O2—C7—N1  | 121.28 (19) | C16—N2—C18  | 125.62 (18) |
| O2—C7—C6  | 118.47 (17) | C19—N2—C18  | 115.6 (2)   |
| N1—C7—C6  | 120.18 (16) | N2—C18—H18A | 109.5       |
| C7—N1—C9  | 117.91 (17) | N2—C18—H18B | 109.5       |

|             |             |               |       |
|-------------|-------------|---------------|-------|
| C7—N1—C10   | 125.35 (17) | H18A—C18—H18B | 109.5 |
| C9—N1—C10   | 116.18 (17) | N2—C18—H18C   | 109.5 |
| N1—C9—H9A   | 109.5       | H18A—C18—H18C | 109.5 |
| N1—C9—H9B   | 109.5       | H18B—C18—H18C | 109.5 |
| H9A—C9—H9B  | 109.5       | N2—C19—H19A   | 109.5 |
| N1—C9—H9C   | 109.5       | N2—C19—H19B   | 109.5 |
| H9A—C9—H9C  | 109.5       | H19A—C19—H19B | 109.5 |
| H9B—C9—H9C  | 109.5       | N2—C19—H19C   | 109.5 |
| N1—C10—H10A | 109.5       | H19A—C19—H19C | 109.5 |
| N1—C10—H10B | 109.5       | H19B—C19—H19C | 109.5 |

**Table 5. Anisotropic displacement parameters ( $\text{\AA}^2$ ) for 2a. The anisotropic displacement factor exponent takes the form:  $-2\pi^2[ h^2 a^* 2 U_{11} + \dots + 2 h k a^* b^* U_{12} ]$**

|     | U11          | U22          | U33          | U12          | U13          | U23          |
|-----|--------------|--------------|--------------|--------------|--------------|--------------|
| Se1 | 0.03870 (11) | 0.03357 (10) | 0.03694 (10) | -0.00830 (7) | 0.01222 (8)  | 0.00188 (7)  |
| Se2 | 0.04531 (12) | 0.03006 (10) | 0.05242 (13) | -0.00619 (7) | 0.02684 (10) | -0.00080 (8) |
| O1  | 0.0452 (8)   | 0.0494 (8)   | 0.0654 (9)   | -0.0070 (7)  | 0.0072 (7)   | 0.0071 (7)   |
| O2  | 0.0553 (9)   | 0.0426 (8)   | 0.1093 (13)  | 0.0100 (7)   | 0.0435 (9)   | 0.0290 (9)   |
| C8  | 0.0341 (9)   | 0.0258 (7)   | 0.0369 (8)   | 0.0018 (6)   | 0.0167 (7)   | 0.0004 (6)   |
| C1  | 0.0392 (10)  | 0.0281 (8)   | 0.0400 (9)   | -0.0027 (7)  | 0.0121 (8)   | 0.0048 (7)   |
| C2  | 0.0469 (11)  | 0.0363 (9)   | 0.0595 (12)  | -0.0011 (8)  | 0.0246 (10)  | 0.0005 (9)   |



|     |             |             |             |              |             |              |
|-----|-------------|-------------|-------------|--------------|-------------|--------------|
| C3  | 0.0696 (16) | 0.0403 (11) | 0.0754 (15) | 0.0045 (11)  | 0.0376 (13) | -0.0037 (11) |
| C4  | 0.0857 (19) | 0.0356 (10) | 0.0817 (17) | -0.0085 (11) | 0.0384 (15) | -0.0108 (11) |
| C5  | 0.0587 (13) | 0.0339 (9)  | 0.0627 (13) | -0.0135 (9)  | 0.0199 (11) | 0.0007 (9)   |
| C6  | 0.0387 (10) | 0.0301 (8)  | 0.0441 (10) | -0.0047 (7)  | 0.0104 (8)  | 0.0074 (7)   |
| C7  | 0.0346 (10) | 0.0345 (9)  | 0.0533 (11) | -0.0041 (8)  | 0.0120 (9)  | 0.0093 (8)   |
| N1  | 0.0408 (9)  | 0.0397 (8)  | 0.0591 (10) | -0.0026 (7)  | 0.0193 (8)  | 0.0121 (8)   |
| C9  | 0.0536 (14) | 0.0704 (16) | 0.0979 (19) | -0.0005 (13) | 0.0439 (14) | 0.0197 (15)  |
| C10 | 0.0707 (15) | 0.0428 (11) | 0.0547 (12) | -0.0067 (11) | 0.0216 (11) | 0.0139 (10)  |
| C11 | 0.0399 (10) | 0.0332 (8)  | 0.0441 (10) | -0.0012 (7)  | 0.0163 (8)  | -0.0031 (8)  |
| C12 | 0.0499 (12) | 0.0480 (11) | 0.0371 (10) | 0.0050 (9)   | 0.0124 (9)  | -0.0033 (9)  |
| C13 | 0.0659 (14) | 0.0560 (12) | 0.0398 (10) | 0.0031 (11)  | 0.0248 (10) | 0.0082 (9)   |
| C14 | 0.0574 (13) | 0.0441 (10) | 0.0517 (11) | -0.0045 (9)  | 0.0307 (10) | 0.0072 (9)   |
| C15 | 0.0376 (9)  | 0.0307 (8)  | 0.0402 (9)  | -0.0009 (7)  | 0.0193 (8)  | 0.0016 (7)   |
| C16 | 0.0398 (10) | 0.0379 (9)  | 0.0467 (10) | -0.0098 (8)  | 0.0226 (9)  | 0.0010 (8)   |
| N2  | 0.0600 (11) | 0.0381 (8)  | 0.0554 (10) | -0.0170 (8)  | 0.0257 (9)  | -0.0060 (8)  |
| C18 | 0.098 (2)   | 0.0333 (10) | 0.0871 (17) | -0.0030 (12) | 0.0463 (15) | 0.0008 (12)  |
| C19 | 0.0816 (19) | 0.0716 (16) | 0.0731 (16) | -0.0411 (15) | 0.0302 (14) | -0.0241 (14) |

---

Crystal Structure of bis(*N,N*-diisopropylbenzamide) diselenide **2c** with 50% ellipsoidal probability (CCDC No.- 1059009)

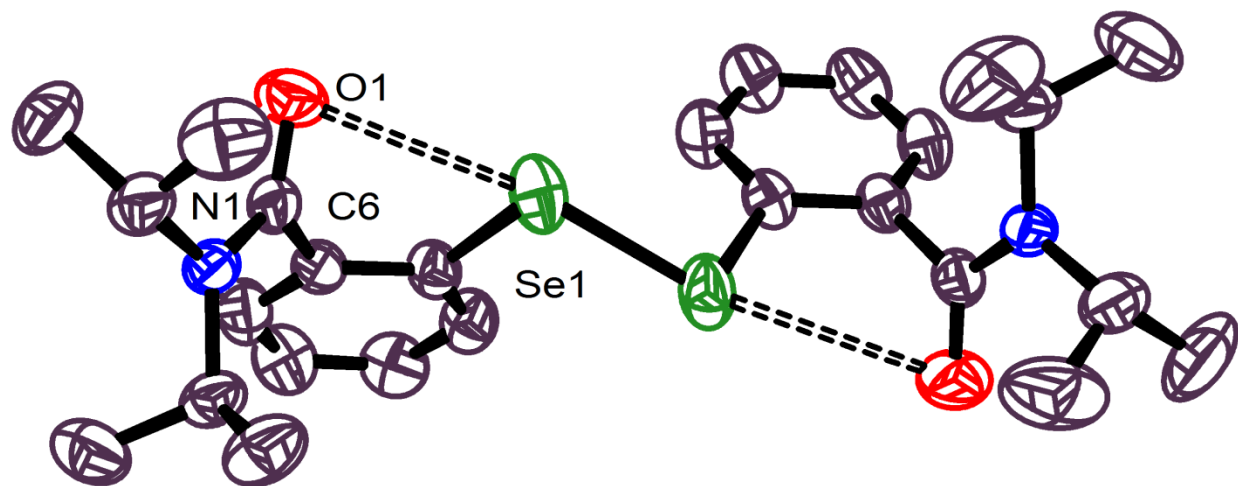

Packing diagram for **2c**

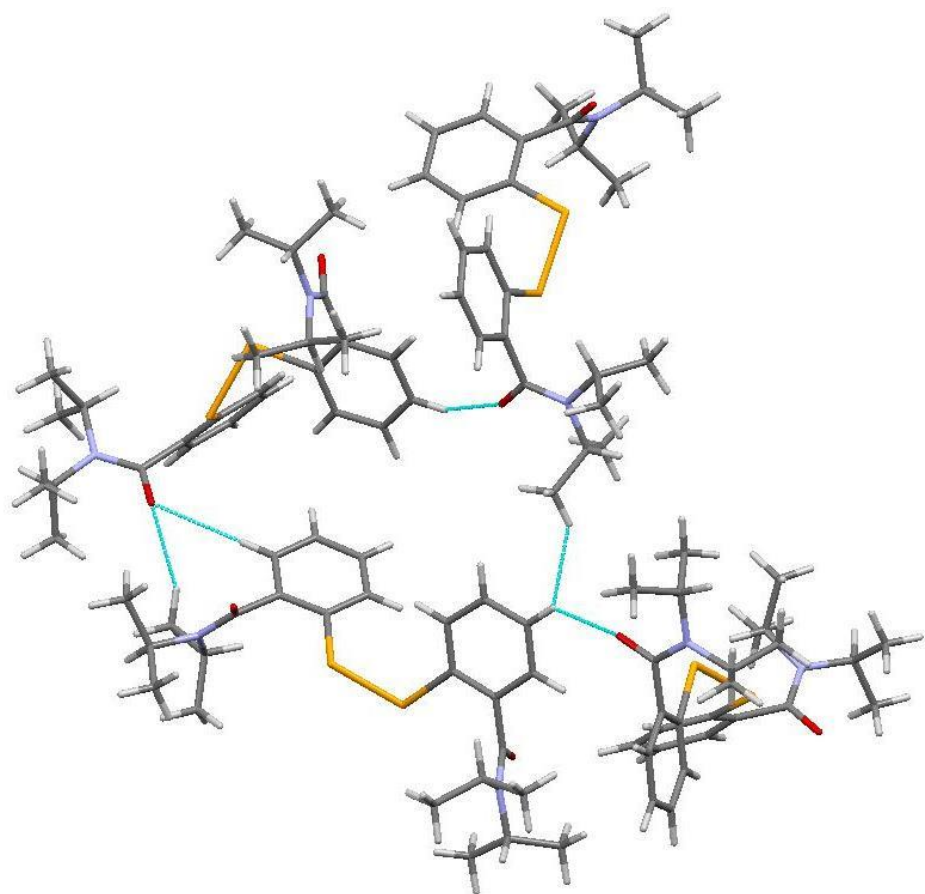

**Table 6. Crystal data and structure refinement for 2c**

|                                   |                                                                               |          |
|-----------------------------------|-------------------------------------------------------------------------------|----------|
| Identification code               | <b>Saket_DS</b>                                                               |          |
| Empirical formula                 | C <sub>26</sub> H <sub>36</sub> N <sub>2</sub> O <sub>2</sub> Se <sub>2</sub> |          |
| Formula weight                    | 566.49                                                                        |          |
| Temperature                       | 298(2) K                                                                      |          |
| Wavelength                        | 0.71073 Å                                                                     |          |
| Crystal system                    | Orthorhombic                                                                  |          |
| Space group                       | P b c a                                                                       |          |
| Unit cell dimensions              | a = 19.2091(7) Å                                                              | α = 90°. |
|                                   | b = 9.3046(3) Å                                                               | β = 90°. |
|                                   | c = 30.9426(11) Å                                                             | γ = 90°. |
| Volume                            | 5530.5(3) Å <sup>3</sup>                                                      |          |
| Z                                 | 8                                                                             |          |
| Density (calculated)              | 1.361 g/cm <sup>3</sup>                                                       |          |
| Absorption coefficient            | 2.697 mm <sup>-1</sup>                                                        |          |
| F(000)                            | 2320                                                                          |          |
| Theta range for data collection   | 2.120 to 25.718°.                                                             |          |
| Index ranges                      | -23 ≤ h ≤ 23, -11 ≤ k ≤ 11, -37 ≤ l ≤ 36                                      |          |
| Reflections collected             | 56260                                                                         |          |
| Independent reflections           | 5260 [R(int) = 0.1038]                                                        |          |
| Completeness to theta = 25.242°   | 100.0 %                                                                       |          |
| Absorption correction             | None                                                                          |          |
| Refinement method                 | Full-matrix least-squares on F <sup>2</sup>                                   |          |
| Data / restraints / parameters    | 5260 / 0 / 297                                                                |          |
| Goodness-of-fit on F <sup>2</sup> | 1.041                                                                         |          |
| Final R indices [I > 2σ(I)]       | R1 = 0.0452, wR2 = 0.0909                                                     |          |
| R indices (all data)              | R1 = 0.0856, wR2 = 0.1053                                                     |          |
| Extinction coefficient            | n/a                                                                           |          |
| Largest diff. peak and hole       | 0.900 and -0.718 e.Å <sup>-3</sup>                                            |          |

**Table 7. Atomic coordinates (  $\times 10^4$ ) and equivalent isotropic displacement parameters ( $\text{\AA}^2 \times 10^3$ ) for 2c. U(eq) is defined as one third of the trace of the orthogonalized  $U^{ij}$  tensor.**

|       | x       | y        | z       | U(eq) |
|-------|---------|----------|---------|-------|
| Se(1) | 4078(1) | 6454(1)  | 4078(1) | 65(1) |
| Se(2) | 4962(1) | 6980(1)  | 3595(1) | 68(1) |
| N(2)  | 5974(1) | 10327(3) | 3267(1) | 44(1) |
| O(1)  | 2963(1) | 5273(3)  | 4687(1) | 68(1) |
| N(1)  | 3562(1) | 3274(3)  | 4877(1) | 47(1) |
| O(2)  | 6039(2) | 8278(3)  | 2881(1) | 81(1) |
| C(1)  | 3686(2) | 4727(4)  | 3832(1) | 47(1) |
| C(6)  | 3346(2) | 3804(4)  | 4114(1) | 45(1) |
| C(19) | 4919(2) | 9245(4)  | 2975(1) | 47(1) |
| C(20) | 5694(2) | 9253(4)  | 3039(1) | 49(1) |
| C(7)  | 3282(2) | 4177(4)  | 4585(1) | 48(1) |
| C(8)  | 4070(2) | 2153(4)  | 4757(1) | 54(1) |
| C(14) | 4502(2) | 8273(4)  | 3196(1) | 50(1) |
| C(21) | 5553(2) | 11417(4) | 3491(1) | 60(1) |
| C(11) | 3409(2) | 3445(4)  | 5342(1) | 59(1) |
| C(5)  | 3017(2) | 2593(4)  | 3949(1) | 60(1) |
| C(2)  | 3724(2) | 4393(4)  | 3395(1) | 58(1) |
| C(15) | 3789(2) | 8252(4)  | 3127(1) | 62(1) |
| C(4)  | 3050(2) | 2286(5)  | 3516(1) | 69(1) |
| C(24) | 6734(2) | 10414(5) | 3320(2) | 67(1) |
| C(16) | 3500(2) | 9168(4)  | 2829(1) | 67(1) |
| C(18) | 4609(2) | 10148(4) | 2674(1) | 59(1) |
| C(17) | 3903(2) | 10111(4) | 2602(1) | 67(1) |
| C(3)  | 3411(2) | 3171(5)  | 3241(1) | 67(1) |
| C(12) | 2626(2) | 3320(5)  | 5426(2) | 80(1) |
| C(10) | 4764(2) | 2405(5)  | 4980(2) | 76(1) |

|       |         |          |         |        |
|-------|---------|----------|---------|--------|
| C(9)  | 3793(2) | 652(5)   | 4842(2) | 83(1)  |
| C(13) | 3724(3) | 4803(5)  | 5533(2) | 86(1)  |
| C(22) | 5646(3) | 11353(7) | 3975(2) | 111(2) |
| C(23) | 5686(3) | 12908(5) | 3312(2) | 109(2) |
| C(25) | 7093(2) | 10657(7) | 2892(2) | 120(2) |
| C(26) | 7023(3) | 9150(6)  | 3572(2) | 119(2) |

---

**Table 8. Selected bond lengths [Å] for 2c.**

|         |            |          |           |
|---------|------------|----------|-----------|
| Se1—C1  | 1.932 (4)  | C4—H4    | 0.95      |
| Se1—Se2 | 2.3147 (6) | C24—C25  | 1.509 (6) |
| Se2—C14 | 1.936 (3)  | C24—C26  | 1.516 (7) |
| N2—C20  | 1.338 (4)  | C24—H24  | 1         |
| N2—C21  | 1.470 (4)  | C16—C17  | 1.366 (6) |
| N2—C24  | 1.472 (4)  | C16—H16  | 0.95      |
| O1—C7   | 1.231 (4)  | C18—C17  | 1.375 (5) |
| N1—C7   | 1.347 (4)  | C18—H18  | 0.95      |
| N1—C8   | 1.476 (4)  | C17—H17  | 0.95      |
| N1—C11  | 1.477 (4)  | C3—H3    | 0.95      |
| O2—C20  | 1.225 (4)  | C12—H12A | 0.98      |
| C1—C6   | 1.389 (5)  | C12—H12B | 0.98      |
| C1—C2   | 1.390 (5)  | C12—H12C | 0.98      |
| C6—C5   | 1.389 (5)  | C10—H10A | 0.98      |
| C6—C7   | 1.502 (5)  | C10—H10B | 0.98      |
| C19—C18 | 1.388 (5)  | C10—H10C | 0.98      |
| C19—C14 | 1.390 (5)  | C9—H9A   | 0.98      |
| C19—C20 | 1.500 (5)  | C9—H9B   | 0.98      |
| C8—C9   | 1.517 (6)  | C9—H9C   | 0.98      |
| C8—C10  | 1.521 (5)  | C13—H13A | 0.98      |
| C8—H8   | 1          | C13—H13B | 0.98      |

|         |           |          |      |
|---------|-----------|----------|------|
| C14—C15 | 1.385 (5) | C13—H13C | 0.98 |
| C21—C22 | 1.510 (6) | C22—H22A | 0.98 |
| C21—C23 | 1.515 (6) | C22—H22B | 0.98 |
| C21—H21 | 1         | C22—H22C | 0.98 |
| C11—C13 | 1.520 (6) | C23—H23A | 0.98 |
| C11—C12 | 1.531 (5) | C23—H23B | 0.98 |
| C11—H11 | 1         | C23—H23C | 0.98 |
| C5—C4   | 1.374 (5) | C25—H25A | 0.98 |
| C5—H5   | 0.95      | C25—H25B | 0.98 |
| C2—C3   | 1.372 (5) | C25—H25C | 0.98 |
| C2—H2   | 0.95      | C26—H26A | 0.98 |
| C15—C16 | 1.372 (5) | C26—H26B | 0.98 |
| C15—H15 | 0.95      | C26—H26C | 0.98 |
| C4—C3   | 1.372 (6) |          |      |

**Table 9. Selected bond angles [°] for 2c.**

|             |             |             |           |
|-------------|-------------|-------------|-----------|
| C1—Se1—Se2  | 101.94 (11) | C26—C24—H24 | 106.4     |
| C14—Se2—Se1 | 101.99 (11) | C17—C16—C15 | 121.0 (4) |
| C20—N2—C21  | 122.9 (3)   | C17—C16—H16 | 119.5     |
| C20—N2—C24  | 119.9 (3)   | C15—C16—H16 | 119.5     |
| C21—N2—C24  | 117.1 (3)   | C17—C18—C19 | 121.2 (4) |
| C7—N1—C8    | 122.3 (3)   | C17—C18—H18 | 119.4     |
| C7—N1—C11   | 120.5 (3)   | C19—C18—H18 | 119.4     |
| C8—N1—C11   | 117.0 (3)   | C16—C17—C18 | 119.4 (4) |
| C6—C1—C2    | 120.0 (3)   | C16—C17—H17 | 120.3     |
| C6—C1—Se1   | 116.7 (3)   | C18—C17—H17 | 120.3     |
| C2—C1—Se1   | 123.3 (3)   | C4—C3—C2    | 120.3 (4) |
| C1—C6—C5    | 118.9 (3)   | C4—C3—H3    | 119.9     |

|             |           |               |       |
|-------------|-----------|---------------|-------|
| C1—C6—C7    | 120.4 (3) | C2—C3—H3      | 119.9 |
| C5—C6—C7    | 120.4 (3) | C11—C12—H12A  | 109.5 |
| C18—C19—C14 | 118.4 (3) | C11—C12—H12B  | 109.5 |
| C18—C19—C20 | 120.8 (3) | H12A—C12—H12B | 109.5 |
| C14—C19—C20 | 120.7 (3) | C11—C12—H12C  | 109.5 |
| O2—C20—N2   | 123.1 (3) | H12A—C12—H12C | 109.5 |
| O2—C20—C19  | 118.7 (3) | H12B—C12—H12C | 109.5 |
| N2—C20—C19  | 118.2 (3) | C8—C10—H10A   | 109.5 |
| O1—C7—N1    | 122.9 (3) | C8—C10—H10B   | 109.5 |
| O1—C7—C6    | 118.7 (3) | H10A—C10—H10B | 109.5 |
| N1—C7—C6    | 118.3 (3) | C8—C10—H10C   | 109.5 |
| N1—C8—C9    | 112.0 (3) | H10A—C10—H10C | 109.5 |
| N1—C8—C10   | 110.9 (3) | H10B—C10—H10C | 109.5 |
| C9—C8—C10   | 111.8 (3) | C8—C9—H9A     | 109.5 |
| N1—C8—H8    | 107.3     | C8—C9—H9B     | 109.5 |
| C9—C8—H8    | 107.3     | H9A—C9—H9B    | 109.5 |
| C10—C8—H8   | 107.3     | C8—C9—H9C     | 109.5 |
| C15—C14—C19 | 120.2 (3) | H9A—C9—H9C    | 109.5 |
| C15—C14—Se2 | 122.8 (3) | H9B—C9—H9C    | 109.5 |
| C19—C14—Se2 | 117.0 (3) | C11—C13—H13A  | 109.5 |
| N2—C21—C22  | 112.0 (4) | C11—C13—H13B  | 109.5 |
| N2—C21—C23  | 111.5 (4) | H13A—C13—H13B | 109.5 |
| C22—C21—C23 | 112.3 (4) | C11—C13—H13C  | 109.5 |
| N2—C21—H21  | 106.9     | H13A—C13—H13C | 109.5 |
| C22—C21—H21 | 106.9     | H13B—C13—H13C | 109.5 |
| C23—C21—H21 | 106.9     | C21—C22—H22A  | 109.5 |
| N1—C11—C13  | 112.8 (3) | C21—C22—H22B  | 109.5 |
| N1—C11—C12  | 110.6 (3) | H22A—C22—H22B | 109.5 |

|             |           |               |       |
|-------------|-----------|---------------|-------|
| C13—C11—C12 | 112.9 (4) | C21—C22—H22C  | 109.5 |
| N1—C11—H11  | 106.7     | H22A—C22—H22C | 109.5 |
| C13—C11—H11 | 106.7     | H22B—C22—H22C | 109.5 |
| C12—C11—H11 | 106.7     | C21—C23—H23A  | 109.5 |
| C4—C5—C6    | 120.5 (4) | C21—C23—H23B  | 109.5 |
| C4—C5—H5    | 119.8     | H23A—C23—H23B | 109.5 |
| C6—C5—H5    | 119.8     | C21—C23—H23C  | 109.5 |
| C3—C2—C1    | 120.0 (4) | H23A—C23—H23C | 109.5 |
| C3—C2—H2    | 120       | H23B—C23—H23C | 109.5 |
| C1—C2—H2    | 120       | C24—C25—H25A  | 109.5 |
| C16—C15—C14 | 119.7 (4) | C24—C25—H25B  | 109.5 |
| C16—C15—H15 | 120.1     | H25A—C25—H25B | 109.5 |
| C14—C15—H15 | 120.1     | C24—C25—H25C  | 109.5 |
| C3—C4—C5    | 120.3 (4) | H25A—C25—H25C | 109.5 |
| C3—C4—H4    | 119.9     | H25B—C25—H25C | 109.5 |
| C5—C4—H4    | 119.9     | C24—C26—H26A  | 109.5 |
| N2—C24—C25  | 111.4 (4) | C24—C26—H26B  | 109.5 |
| N2—C24—C26  | 112.2 (4) | H26A—C26—H26B | 109.5 |
| C25—C24—C26 | 113.6 (4) | C24—C26—H26C  | 109.5 |
| N2—C24—H24  | 106.4     | H26A—C26—H26C | 109.5 |
| C25—C24—H24 | 106.4     | H26B—C26—H26C | 109.5 |

**Table 10.** Anisotropic displacement parameters ( $\text{\AA}^2 \times 10^3$ ) for **2c**. The anisotropic displacement factor exponent takes the form:  $-2\pi^2 [ h^2 a^* 2U^{11} + \dots + 2 h k a^* b^* U^{12} ]$

|       | U <sup>11</sup> | U <sup>22</sup> | U <sup>33</sup> | U <sup>23</sup> | U <sup>13</sup> | U <sup>12</sup> |
|-------|-----------------|-----------------|-----------------|-----------------|-----------------|-----------------|
| Se(1) | 81(1)           | 60(1)           | 54(1)           | 12(1)           | -6(1)           | -18(1)          |
| Se(2) | 54(1)           | 67(1)           | 84(1)           | 33(1)           | -11(1)          | -8(1)           |



|       |       |       |        |        |        |        |
|-------|-------|-------|--------|--------|--------|--------|
| N(2)  | 45(2) | 43(2) | 44(2)  | -9(1)  | 5(1)   | -1(1)  |
| O(1)  | 85(2) | 56(2) | 64(2)  | 11(1)  | 10(2)  | 26(2)  |
| N(1)  | 45(2) | 50(2) | 46(2)  | 11(1)  | 8(1)   | 10(1)  |
| O(2)  | 73(2) | 66(2) | 105(3) | -42(2) | 8(2)   | 1(2)   |
| C(1)  | 48(2) | 47(2) | 46(2)  | 13(2)  | -5(2)  | 2(2)   |
| C(6)  | 42(2) | 46(2) | 48(2)  | 12(2)  | -1(2)  | 7(2)   |
| C(19) | 55(2) | 42(2) | 43(2)  | -2(2)  | -2(2)  | -6(2)  |
| C(20) | 60(2) | 41(2) | 46(2)  | 0(2)   | 9(2)   | -5(2)  |
| C(7)  | 46(2) | 48(2) | 51(2)  | 12(2)  | 6(2)   | 3(2)   |
| C(8)  | 43(2) | 67(3) | 51(2)  | 9(2)   | 4(2)   | 16(2)  |
| C(14) | 57(2) | 42(2) | 51(2)  | 7(2)   | -3(2)  | -3(2)  |
| C(21) | 48(2) | 61(2) | 70(3)  | -23(2) | 5(2)   | 4(2)   |
| C(11) | 63(2) | 67(3) | 46(2)  | 14(2)  | 11(2)  | 17(2)  |
| C(5)  | 56(2) | 58(2) | 65(3)  | 14(2)  | 0(2)   | -6(2)  |
| C(2)  | 58(2) | 67(3) | 48(2)  | 15(2)  | -2(2)  | 0(2)   |
| C(15) | 55(2) | 61(3) | 70(3)  | 15(2)  | -9(2)  | -8(2)  |
| C(4)  | 77(3) | 65(3) | 64(3)  | -1(2)  | -11(2) | -8(2)  |
| C(24) | 46(2) | 70(3) | 86(3)  | -28(2) | 4(2)   | -1(2)  |
| C(16) | 62(3) | 59(2) | 80(3)  | 10(2)  | -22(2) | -3(2)  |
| C(18) | 73(3) | 56(2) | 48(2)  | 9(2)   | -4(2)  | -15(2) |
| C(17) | 85(3) | 55(2) | 61(3)  | 12(2)  | -24(2) | -3(2)  |
| C(3)  | 79(3) | 71(3) | 50(2)  | 0(2)   | -9(2)  | 6(2)   |
| C(12) | 71(3) | 97(3) | 71(3)  | 20(3)  | 31(2)  | 13(3)  |

|       |        |        |        |        |        |        |
|-------|--------|--------|--------|--------|--------|--------|
| C(10) | 52(2)  | 107(4) | 68(3)  | 5(3)   | 0(2)   | 18(2)  |
| C(9)  | 83(3)  | 59(3)  | 106(4) | 11(3)  | -4(3)  | 19(2)  |
| C(13) | 94(4)  | 101(4) | 63(3)  | -12(3) | -3(3)  | 10(3)  |
| C(22) | 110(4) | 156(5) | 68(3)  | -49(4) | 20(3)  | 4(4)   |
| C(23) | 113(4) | 51(3)  | 162(6) | -16(3) | -7(4)  | 15(3)  |
| C(25) | 69(3)  | 153(5) | 137(5) | -44(4) | 52(3)  | -33(3) |
| C(26) | 89(4)  | 106(4) | 163(6) | -24(4) | -46(4) | 39(3)  |

**Table 11. Hydrogen coordinates (  $\times 10^4$  ) and isotropic displacement parameters ( $\text{\AA}^2 \times 10^3$ ) for 2c.**

|        | x    | y     | z    | U(eq) |
|--------|------|-------|------|-------|
| H(8)   | 4152 | 2237  | 4439 | 65    |
| H(21)  | 5054 | 11186 | 3431 | 72    |
| H(11)  | 3634 | 2617  | 5494 | 70    |
| H(5)   | 2768 | 1973  | 4138 | 72    |
| H(2)   | 3968 | 5011  | 3203 | 70    |
| H(15)  | 3502 | 7606  | 3284 | 74    |
| H(4)   | 2821 | 1458  | 3405 | 83    |
| H(24)  | 6827 | 11288 | 3499 | 81    |
| H(16)  | 3011 | 9146  | 2781 | 80    |
| H(18)  | 4889 | 10804 | 2516 | 71    |
| H(17)  | 3697 | 10735 | 2395 | 80    |
| H(3)   | 3443 | 2937  | 2942 | 80    |
| H(12A) | 2390 | 4179  | 5317 | 120   |
| H(12B) | 2543 | 3231  | 5738 | 120   |

|        |      |       |      |     |
|--------|------|-------|------|-----|
| H(12C) | 2444 | 2468  | 5278 | 120 |
| H(10A) | 4929 | 3379  | 4916 | 114 |
| H(10B) | 5105 | 1704  | 4875 | 114 |
| H(10C) | 4707 | 2294  | 5293 | 114 |
| H(9A)  | 3741 | 506   | 5154 | 124 |
| H(9B)  | 4120 | -59   | 4725 | 124 |
| H(9C)  | 3339 | 539   | 4701 | 124 |
| H(13A) | 3635 | 4831  | 5844 | 129 |
| H(13B) | 3513 | 5647  | 5396 | 129 |
| H(13C) | 4227 | 4808  | 5481 | 129 |
| H(22A) | 5544 | 10379 | 4078 | 167 |
| H(22B) | 5328 | 12036 | 4114 | 167 |
| H(22C) | 6128 | 11604 | 4049 | 167 |
| H(23A) | 6168 | 13191 | 3374 | 163 |
| H(23B) | 5366 | 13594 | 3448 | 163 |
| H(23C) | 5611 | 12904 | 2999 | 163 |
| H(25A) | 7592 | 10804 | 2941 | 179 |
| H(25B) | 6896 | 11510 | 2752 | 179 |
| H(25C) | 7024 | 9817  | 2706 | 179 |
| H(26A) | 6788 | 9089  | 3853 | 179 |
| H(26B) | 7524 | 9283  | 3617 | 179 |
| H(26C) | 6942 | 8260  | 3410 | 179 |

---

**Crystal structure of bis[2-(*N*-allyl-5-nitrobenzamide)] diselenide 2d with 40% ellipsoidal probability (CCDC No.- 1019634)**

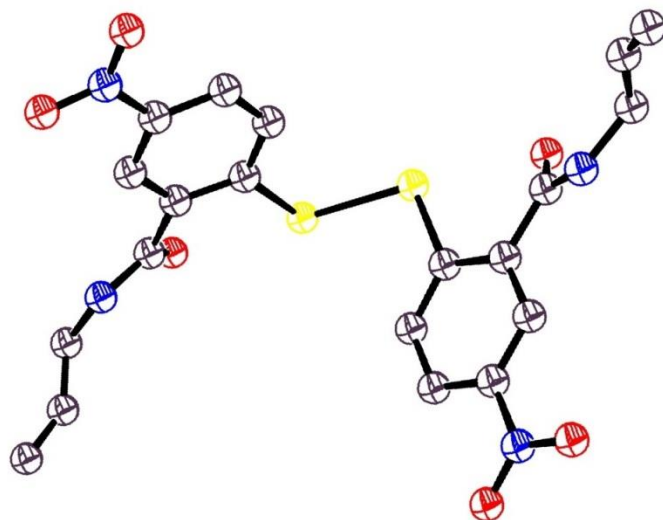

**Packing diagram of 2d**

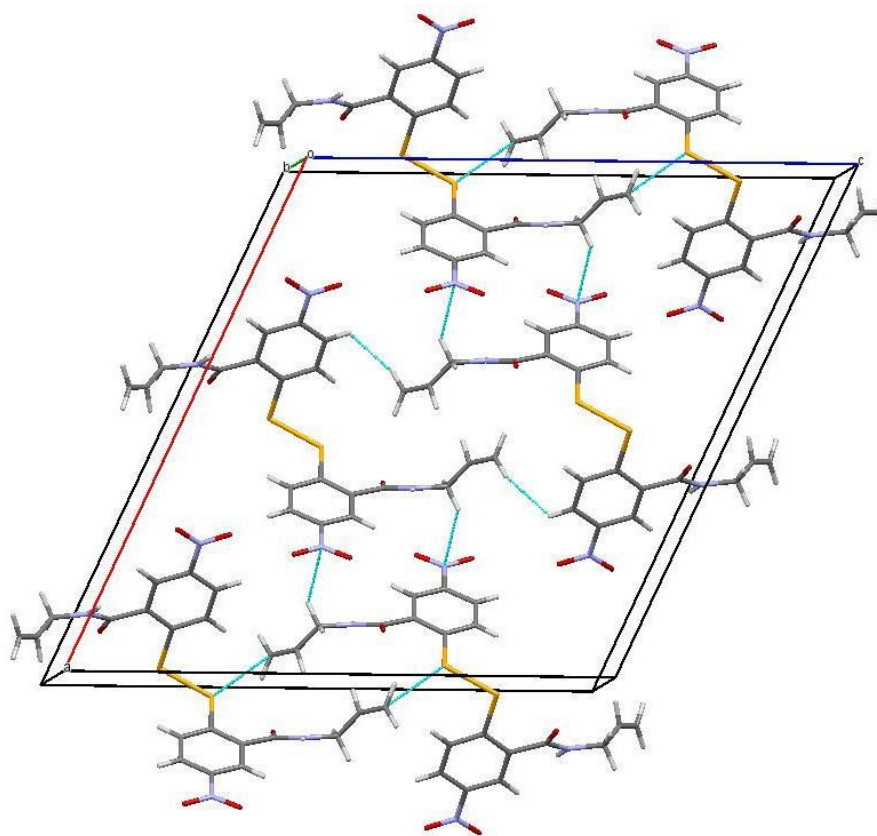

**Table 12. Crystal data and structure refinement for 2d**

|                                   |                                                                                                         |
|-----------------------------------|---------------------------------------------------------------------------------------------------------|
| Identification code               | Try_Ajay                                                                                                |
| Empirical formula                 | C <sub>20</sub> H <sub>18</sub> N <sub>4</sub> O <sub>6</sub> Se <sub>2</sub>                           |
| Formula weight                    | 568.30                                                                                                  |
| Temperature                       | 159(2) K                                                                                                |
| Wavelength                        | 0.71073 Å                                                                                               |
| Crystal system                    | Monoclinic                                                                                              |
| Space group                       | C 2/c                                                                                                   |
| Unit cell dimensions              | a = 22.461(3) Å      α = 90°.<br>b = 4.8135(6) Å      β = 115.883(3)°.<br>c = 21.823(3) Å      γ = 90°. |
| Volume                            | 2122.7(5) Å <sup>3</sup>                                                                                |
| Z                                 | 4                                                                                                       |
| Density (calculated)              | 1.778 g/cm <sup>3</sup>                                                                                 |
| Absorption coefficient            | 3.530 mm <sup>-1</sup>                                                                                  |
| F(000)                            | 1128                                                                                                    |
| Theta range for data collection   | 3.468 to 25.791°.                                                                                       |
| Index ranges                      | -27 ≤ h ≤ 27, -5 ≤ k ≤ 5, -26 ≤ l ≤ 26                                                                  |
| Reflections collected             | 18455                                                                                                   |
| Independent reflections           | 2027 [R(int) = 0.0745]                                                                                  |
| Completeness to theta = 25.242°   | 99.8 %                                                                                                  |
| Absorption correction             | None                                                                                                    |
| Refinement method                 | Full-matrix least-squares on F <sup>2</sup>                                                             |
| Data / restraints / parameters    | 2027 / 0 / 145                                                                                          |
| Goodness-of-fit on F <sup>2</sup> | 1.020                                                                                                   |
| Final R indices [I > 2σ(I)]       | R1 = 0.0398, wR2 = 0.0844                                                                               |
| R indices (all data)              | R1 = 0.0603, wR2 = 0.0927                                                                               |
| Extinction coefficient            | n/a                                                                                                     |
| Largest diff. peak and hole       | 1.077 and -1.043 e.Å <sup>-3</sup>                                                                      |

**Table 13. Atomic coordinates (  $\times 10^4$ ) and equivalent isotropic displacement parameters ( $\text{\AA}^2 \times 10^3$ ) for t Try\_Ajay. U(eq) is defined as one third of the trace of the orthogonalized  $U_{ij}$  tensor.**

|       | x       | y        | z       | U(eq) |
|-------|---------|----------|---------|-------|
| Se(1) | 4728(1) | 12030(1) | 6905(1) | 23(1) |
| O(3)  | 4037(2) | 11631(6) | 5505(2) | 28(1) |
| O(2)  | 2317(2) | 2141(7)  | 5754(2) | 40(1) |
| C(6)  | 3712(2) | 8168(9)  | 6069(2) | 20(1) |
| O(1)  | 2386(2) | 2706(9)  | 6762(2) | 53(1) |
| N(2)  | 3823(2) | 7340(8)  | 5035(2) | 31(1) |
| C(1)  | 4032(2) | 9343(9)  | 6723(2) | 20(1) |
| C(5)  | 3226(2) | 6182(9)  | 5937(2) | 22(1) |
| N(1)  | 2553(2) | 3277(8)  | 6314(2) | 33(1) |
| C(7)  | 3875(2) | 9178(9)  | 5512(2) | 22(1) |
| C(2)  | 3840(2) | 8562(10) | 7222(2) | 30(1) |
| C(4)  | 3056(2) | 5423(9)  | 6450(2) | 26(1) |
| C(3)  | 3349(2) | 6611(11) | 7091(2) | 34(1) |
| C(10) | 4360(3) | 4732(12) | 3902(3) | 45(1) |
| C(8)  | 3884(4) | 8067(12) | 4420(3) | 62(2) |
| C(9)  | 4306(5) | 6595(15) | 4267(4) | 97(3) |

**Table 14. Selected bond lengths [Å] for Try\_Ajay.**

|          |            |        |           |
|----------|------------|--------|-----------|
| Se1—C1   | 1.931 (4)  | C5—H3  | 0.95      |
| Se1—Se1' | 2.3390 (9) | N1—C4  | 1.463 (5) |
| O3—C7    | 1.238 (5)  | C2—C3  | 1.381 (6) |
| O2—N1    | 1.228 (5)  | C2—H1  | 0.95      |
| C6—C5    | 1.383 (6)  | C4—C3  | 1.383 (6) |
| C6—C1    | 1.406 (6)  | C3—H2  | 0.95      |
| C6—C7    | 1.497 (6)  | C10—C9 | 1.240 (8) |
| O1—N1    | 1.223 (5)  | C10—H8 | 0.95      |
| N2—C7    | 1.331 (5)  | C10—H7 | 0.95      |
| N2—C8    | 1.451 (6)  | C8—C9  | 1.337 (9) |
| N2—H4    | 0.88       | C8—H8A | 0.99      |
| C1—C2    | 1.388 (6)  | C8—H8B | 0.99      |
| C5—C4    | 1.382 (6)  | C9—H6  | 0.95      |

---

**Table 15. Selected Bond angles [°] for Try\_Ajay.**

|             |             |           |           |
|-------------|-------------|-----------|-----------|
| C1—Se1—Se1' | 102.25 (12) | C3—C2—H1  | 119.5     |
| C5—C6—C1    | 119.9 (4)   | C1—C2—H1  | 119.5     |
| C5—C6—C7    | 120.3 (4)   | C5—C4—C3  | 122.3 (4) |
| C1—C6—C7    | 119.7 (4)   | C5—C4—N1  | 118.9 (4) |
| C7—N2—C8    | 123.4 (4)   | C3—C4—N1  | 118.8 (4) |
| C7—N2—H4    | 118.3       | C2—C3—C4  | 118.3 (4) |
| C8—N2—H4    | 118.3       | C2—C3—H2  | 120.8     |
| C2—C1—C6    | 119.4 (4)   | C4—C3—H2  | 120.8     |
| C2—C1—Se1   | 121.4 (3)   | C9—C10—H8 | 120       |
| C6—C1—Se1   | 119.2 (3)   | C9—C10—H7 | 120       |
| C4—C5—C6    | 119.0 (4)   | H8—C10—H7 | 120       |
| C4—C5—H3    | 120.5       | C9—C8—N2  | 117.8 (5) |

|          |           |            |            |
|----------|-----------|------------|------------|
| C6—C5—H3 | 120.5     | C9—C8—H8A  | 107.9      |
| O1—N1—O2 | 123.2 (4) | N2—C8—H8A  | 107.9      |
| O1—N1—C4 | 118.4 (4) | C9—C8—H8B  | 107.9      |
| O2—N1—C4 | 118.4 (4) | N2—C8—H8B  | 107.9      |
| O3—C7—N2 | 123.4 (4) | H8A—C8—H8B | 107.2      |
| O3—C7—C6 | 119.8 (4) | C10—C9—C8  | 145.3 (10) |
| N2—C7—C6 | 116.8 (4) | C10—C9—H6  | 107.4      |
| C3—C2—C1 | 121.1 (4) | C8—C9—H6   | 107.4      |

Symmetry transformations used to generate equivalent atoms:

Symmetry code: (i)  $-x+1, y, -z+3/2$ .

**Table 16. Anisotropic displacement parameters ( $\text{\AA}^2 \times 10^3$ ) for Try\_Ajay. The anisotropic displacement factor exponent takes the form:  $-2\pi^2 [ h^2 a^*^2 U^{11} + \dots + 2 h k a^* b^* U^{12} ]$**

|       | U <sup>11</sup> | U <sup>22</sup> | U <sup>33</sup> | U <sup>23</sup> | U <sup>13</sup> | U <sup>12</sup> |
|-------|-----------------|-----------------|-----------------|-----------------|-----------------|-----------------|
| Se(1) | 21(1)           | 20(1)           | 22(1)           | 4(1)            | 4(1)            | -1(1)           |
| O(3)  | 38(2)           | 20(2)           | 26(2)           | 3(1)            | 13(1)           | 0(1)            |
| O(2)  | 34(2)           | 42(2)           | 40(2)           | -13(2)          | 12(2)           | -17(2)          |
| C(6)  | 19(2)           | 19(2)           | 21(2)           | 2(2)            | 7(2)            | 6(2)            |
| O(1)  | 47(2)           | 71(3)           | 49(2)           | -4(2)           | 29(2)           | -28(2)          |
| N(2)  | 48(2)           | 23(2)           | 28(2)           | 5(2)            | 23(2)           | 3(2)            |
| C(1)  | 17(2)           | 21(2)           | 22(2)           | 2(2)            | 7(2)            | 1(2)            |
| C(5)  | 18(2)           | 24(2)           | 20(2)           | -1(2)           | 4(2)            | 3(2)            |
| N(1)  | 23(2)           | 35(2)           | 40(2)           | 1(2)            | 13(2)           | -5(2)           |
| C(7)  | 19(2)           | 23(2)           | 21(2)           | 5(2)            | 4(2)            | 6(2)            |
| C(2)  | 29(2)           | 36(3)           | 22(2)           | -4(2)           | 9(2)            | -8(2)           |



|       |        |       |        |       |        |       |
|-------|--------|-------|--------|-------|--------|-------|
| C(4)  | 20(2)  | 27(3) | 30(2)  | 1(2)  | 10(2)  | -4(2) |
| C(3)  | 31(2)  | 47(3) | 26(2)  | -2(2) | 16(2)  | -9(2) |
| C(10) | 57(3)  | 50(4) | 31(3)  | 0(3)  | 23(3)  | 4(3)  |
| C(8)  | 127(6) | 35(3) | 50(3)  | 13(3) | 63(4)  | 17(4) |
| C(9)  | 193(9) | 57(5) | 107(6) | 46(4) | 128(7) | 50(5) |

---

**Table 17. Hydrogen coordinates (  $\times 10^4$ ) and isotropic displacement parameters ( $\text{\AA}^2 \times 10^3$ ) for Try\_Ajay.**

---

|       | x    | y     | z    | U(eq) |
|-------|------|-------|------|-------|
| H(4)  | 3748 | 5592  | 5097 | 37    |
| H(3)  | 3012 | 5352  | 5499 | 27    |
| H(1)  | 4050 | 9382  | 7661 | 36    |
| H(2)  | 3215 | 6098  | 7433 | 40    |
| H(8)  | 3975 | 3825  | 3578 | 54    |
| H(7)  | 4784 | 4210  | 3947 | 54    |
| H(8A) | 3440 | 7915  | 4032 | 74    |
| H(8B) | 4017 | 10043 | 4456 | 74    |
| H(6)  | 4740 | 7233  | 4554 | 116   |

---

**Crystal structure of bis((2-(dimethylcarbamoyl)phenyl)selenanyl)mercury 3a with 50% ellipsoidal probability (CCDC No. 1059007)**

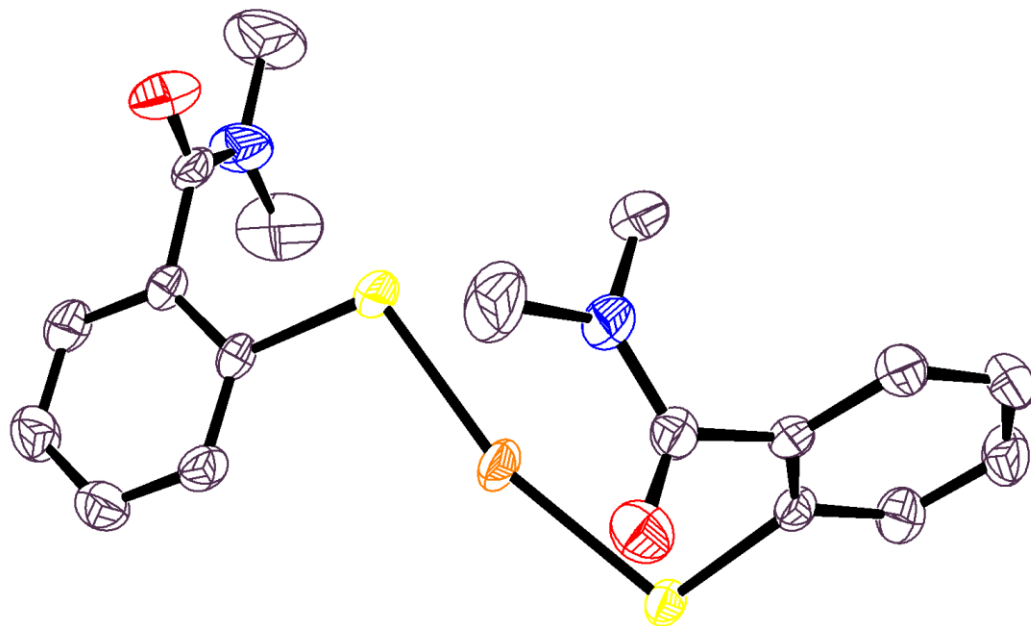

**Crystal Structure of 3a with 50% ellipsoidal probability**

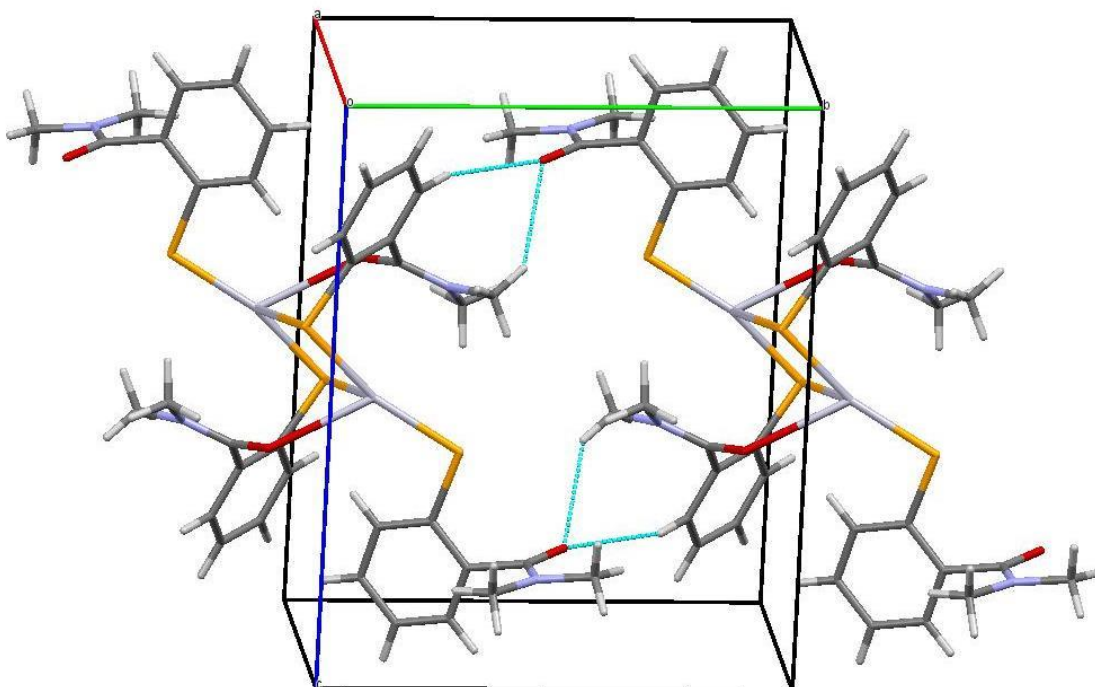

**Table 18. Crystal data and structure refinement for 3a**

|                                   |                                                                                                                              |
|-----------------------------------|------------------------------------------------------------------------------------------------------------------------------|
| Identification code               | Saket_01                                                                                                                     |
| Empirical formula                 | C <sub>18</sub> H <sub>20</sub> Hg N <sub>2</sub> O <sub>2</sub> Se <sub>2</sub>                                             |
| Formula weight                    | 654.87                                                                                                                       |
| Temperature                       | 300(2) K                                                                                                                     |
| Wavelength                        | 0.71073 Å                                                                                                                    |
| Crystal system                    | Triclinic                                                                                                                    |
| Space group                       | P $\bar{1}$                                                                                                                  |
| Unit cell dimensions              | a = 6.4927(2) Å $\alpha$ = 92.694(2)°.<br>b = 11.3302(5) Å $\beta$ = 101.312(2)°.<br>c = 13.9409(6) Å $\gamma$ = 97.023(2)°. |
| Volume                            | 995.42(7) Å <sup>3</sup>                                                                                                     |
| Z                                 | 2                                                                                                                            |
| Density (calculated)              | 2.185 g/cm <sup>3</sup>                                                                                                      |
| Absorption coefficient            | 11.401 mm <sup>-1</sup>                                                                                                      |
| F(000)                            | 612                                                                                                                          |
| Theta range for data collection   | 2.266 to 25.758°.                                                                                                            |
| Index ranges                      | -7 <= h <= 7, -13 <= k <= 13, -17 <= l <= 17                                                                                 |
| Reflections collected             | 17547                                                                                                                        |
| Independent reflections           | 3794 [R(int) = 0.0448]                                                                                                       |
| Completeness to theta = 25.242°   | 99.9 %                                                                                                                       |
| Absorption correction             | None                                                                                                                         |
| Refinement method                 | Full-matrix least-squares on F <sup>2</sup>                                                                                  |
| Data / restraints / parameters    | 3794 / 0 / 230                                                                                                               |
| Goodness-of-fit on F <sup>2</sup> | 1.038                                                                                                                        |
| Final R indices [I > 2sigma(I)]   | R1 = 0.0223, wR2 = 0.0513                                                                                                    |
| R indices (all data)              | R1 = 0.0265, wR2 = 0.0528                                                                                                    |
| Extinction coefficient            | n/a                                                                                                                          |
| Largest diff. peak and hole       | 0.902 and -0.859 e.Å <sup>-3</sup>                                                                                           |

**Table 19. Atomic coordinates (  $\times 10^4$ ) and equivalent isotropic displacement parameters ( $\text{\AA}^2 \times 10^3$ ) for 3a. U(eq) is defined as one third of the trace of the orthogonalized  $U_{ij}$  tensor.**

|       | x       | y       | z       | U(eq) |
|-------|---------|---------|---------|-------|
| Hg(1) | 2986(1) | 1129(1) | 5458(1) | 36(1) |
| Se(1) | 2093(1) | -458(1) | 4110(1) | 27(1) |
| Se(2) | 3518(1) | 3027(1) | 6463(1) | 41(1) |
| O(1)  | 6755(4) | 1000(3) | 3621(2) | 41(1) |
| N(1)  | 5726(6) | 2779(3) | 3951(3) | 39(1) |
| O(2)  | 4598(5) | 5400(3) | 8269(3) | 54(1) |
| C(2)  | 3333(6) | 1323(3) | 2787(3) | 25(1) |
| C(1)  | 1823(6) | 418(3)  | 2947(3) | 25(1) |
| C(7)  | 5401(6) | 1686(3) | 3499(3) | 29(1) |
| C(6)  | 39(6)   | 50(4)   | 2218(3) | 36(1) |
| C(16) | 3322(6) | 4538(3) | 8349(3) | 31(1) |
| C(15) | 5130(6) | 1520(3) | 7994(3) | 35(1) |
| N(2)  | 1289(6) | 4610(3) | 8310(3) | 52(1) |
| C(4)  | 1250(7) | 1480(4) | 1179(3) | 42(1) |
| C(11) | 4078(6) | 3350(3) | 8535(3) | 27(1) |
| C(3)  | 3012(7) | 1854(3) | 1899(3) | 36(1) |
| C(10) | 4296(5) | 2571(3) | 7774(3) | 25(1) |
| C(8)  | 4147(8) | 3596(4) | 3865(3) | 50(1) |
| C(5)  | -232(7) | 573(4)  | 1334(3) | 42(1) |
| C(14) | 5720(7) | 1246(4) | 8955(3) | 43(1) |

|       |         |         |         |       |
|-------|---------|---------|---------|-------|
| C(13) | 5522(7) | 2025(4) | 9712(3) | 46(1) |
| C(12) | 4698(7) | 3079(4) | 9502(3) | 39(1) |
| C(9)  | 7795(9) | 3241(5) | 4550(4) | 66(2) |
| C(18) | -289(8) | 3575(6) | 8311(6) | 93(2) |
| C(17) | 525(11) | 5759(5) | 8140(6) | 94(2) |

**Table 20. Selected bond lengths [Å] for 3a.**

|         |            |          |           |
|---------|------------|----------|-----------|
| Hg1—Se2 | 2.4605 (4) | C4—C5    | 1.374 (6) |
| Hg1—Se1 | 2.4697 (4) | C4—H4    | 0.95      |
| Se1—C1  | 1.930 (3)  | C11—C10  | 1.388 (5) |
| Se2—C10 | 1.911 (4)  | C11—C12  | 1.389 (5) |
| O1—C7   | 1.235 (4)  | C3—H3    | 0.95      |
| N1—C7   | 1.337 (5)  | C8—H8A   | 0.98      |
| N1—C8   | 1.455 (5)  | C8—H8B   | 0.98      |
| N1—C9   | 1.457 (6)  | C8—H8C   | 0.98      |
| O2—C16  | 1.225 (5)  | C5—H5    | 0.95      |
| C2—C1   | 1.387 (5)  | C14—C13  | 1.380 (6) |
| C2—C3   | 1.392 (5)  | C14—H14  | 0.95      |
| C2—C7   | 1.504 (5)  | C13—C12  | 1.388 (6) |
| C1—C6   | 1.389 (5)  | C13—H13  | 0.95      |
| C6—C5   | 1.382 (6)  | C12—H12  | 0.95      |
| C6—H6   | 0.95       | C9—H9A   | 0.98      |
| C16—N2  | 1.323 (5)  | C9—H9B   | 0.98      |
| C16—C11 | 1.505 (5)  | C9—H9C   | 0.98      |
| C15—C14 | 1.379 (6)  | C18—H18A | 0.98      |
| C15—C10 | 1.390 (5)  | C18—H18B | 0.98      |
| C15—H15 | 0.95       | C18—H18C | 0.98      |

|        |           |          |      |
|--------|-----------|----------|------|
| N2—C18 | 1.460 (7) | C17—H17A | 0.98 |
| N2—C17 | 1.462 (6) | C17—H17B | 0.98 |
| C4—C3  | 1.374 (6) | C17—H17C | 0.98 |

---

**Table 21. Selected Bond angles [°] for 3a.**

|             |              |             |           |
|-------------|--------------|-------------|-----------|
| Se2—Hg1—Se1 | 165.235 (14) | C15—C10—Se2 | 122.9 (3) |
| C1—Se1—Hg1  | 103.33 (10)  | N1—C8—H8A   | 109.5     |
| C10—Se2—Hg1 | 103.53 (10)  | N1—C8—H8B   | 109.5     |
| C7—N1—C8    | 124.4 (4)    | H8A—C8—H8B  | 109.5     |
| C7—N1—C9    | 120.1 (4)    | N1—C8—H8C   | 109.5     |
| C8—N1—C9    | 115.5 (4)    | H8A—C8—H8C  | 109.5     |
| C1—C2—C3    | 119.1 (3)    | H8B—C8—H8C  | 109.5     |
| C1—C2—C7    | 122.6 (3)    | C4—C5—C6    | 120.0 (4) |
| C3—C2—C7    | 118.2 (3)    | C4—C5—H5    | 120       |
| C2—C1—C6    | 119.6 (3)    | C6—C5—H5    | 120       |
| C2—C1—Se1   | 124.1 (3)    | C15—C14—C13 | 120.2 (4) |
| C6—C1—Se1   | 116.1 (3)    | C15—C14—H14 | 119.9     |
| O1—C7—N1    | 122.5 (4)    | C13—C14—H14 | 119.9     |
| O1—C7—C2    | 120.0 (3)    | C14—C13—C12 | 119.6 (4) |
| N1—C7—C2    | 117.4 (3)    | C14—C13—H13 | 120.2     |
| C5—C6—C1    | 120.4 (4)    | C12—C13—H13 | 120.2     |
| C5—C6—H6    | 119.8        | C13—C12—C11 | 120.3 (4) |
| C1—C6—H6    | 119.8        | C13—C12—H12 | 119.9     |
| O2—C16—N2   | 122.7 (4)    | C11—C12—H12 | 119.9     |
| O2—C16—C11  | 119.5 (4)    | N1—C9—H9A   | 109.5     |
| N2—C16—C11  | 117.7 (3)    | N1—C9—H9B   | 109.5     |
| C14—C15—C10 | 120.7 (4)    | H9A—C9—H9B  | 109.5     |
| C14—C15—H15 | 119.6        | N1—C9—H9C   | 109.5     |

|             |           |               |       |
|-------------|-----------|---------------|-------|
| C10—C15—H15 | 119.6     | H9A—C9—H9C    | 109.5 |
| C16—N2—C18  | 123.5 (4) | H9B—C9—H9C    | 109.5 |
| C16—N2—C17  | 118.6 (4) | N2—C18—H18A   | 109.5 |
| C18—N2—C17  | 117.5 (4) | N2—C18—H18B   | 109.5 |
| C3—C4—C5    | 119.9 (4) | H18A—C18—H18B | 109.5 |
| C3—C4—H4    | 120.1     | N2—C18—H18C   | 109.5 |
| C5—C4—H4    | 120.1     | H18A—C18—H18C | 109.5 |
| C10—C11—C12 | 120.1 (3) | H18B—C18—H18C | 109.5 |
| C10—C11—C16 | 121.7 (3) | N2—C17—H17A   | 109.5 |
| C12—C11—C16 | 118.1 (3) | N2—C17—H17B   | 109.5 |
| C4—C3—C2    | 121.0 (4) | H17A—C17—H17B | 109.5 |
| C4—C3—H3    | 119.5     | N2—C17—H17C   | 109.5 |
| C2—C3—H3    | 119.5     | H17A—C17—H17C | 109.5 |
| C11—C10—C15 | 119.1 (3) | H17B—C17—H17C | 109.5 |
| C11—C10—Se2 | 118.0 (3) |               |       |

**Table 22.** Anisotropic displacement parameters ( $\text{\AA}^2 \times 10^3$ ) for 3a. The anisotropic displacement factor exponent takes the form:  $-2\pi^2 [h^2 a^{*2} U^{11} + \dots + 2 h k a^* b^* U^{12}]$

|       | U11   | U22   | U33   | U23   | U13   | U12   |
|-------|-------|-------|-------|-------|-------|-------|
| Hg(1) | 52(1) | 34(1) | 21(1) | -6(1) | 7(1)  | 1(1)  |
| Se(1) | 34(1) | 26(1) | 21(1) | -1(1) | 7(1)  | -1(1) |
| Se(2) | 66(1) | 30(1) | 24(1) | -5(1) | 3(1)  | 8(1)  |
| O(1)  | 36(2) | 43(2) | 43(2) | 7(1)  | 7(1)  | 7(1)  |
| N(1)  | 45(2) | 30(2) | 36(2) | -1(1) | -2(2) | -6(2) |
| O(2)  | 63(2) | 30(2) | 69(2) | -1(2) | 24(2) | -3(2) |

|       |       |       |        |       |        |        |
|-------|-------|-------|--------|-------|--------|--------|
| C(2)  | 30(2) | 23(2) | 24(2)  | -2(1) | 7(2)   | 7(2)   |
| C(1)  | 28(2) | 26(2) | 22(2)  | -3(1) | 6(1)   | 5(2)   |
| C(7)  | 34(2) | 27(2) | 24(2)  | 4(2)  | 8(2)   | -3(2)  |
| C(6)  | 32(2) | 40(2) | 33(2)  | -2(2) | 1(2)   | 1(2)   |
| C(16) | 41(2) | 25(2) | 26(2)  | -8(2) | 7(2)   | 2(2)   |
| C(15) | 38(2) | 32(2) | 34(2)  | -6(2) | 9(2)   | 9(2)   |
| N(2)  | 38(2) | 42(2) | 79(3)  | 2(2)  | 10(2)  | 17(2)  |
| C(4)  | 58(3) | 42(2) | 27(2)  | 9(2)  | 3(2)   | 18(2)  |
| C(11) | 23(2) | 30(2) | 28(2)  | -4(2) | 6(1)   | 0(2)   |
| C(3)  | 52(3) | 31(2) | 28(2)  | 5(2)  | 11(2)  | 7(2)   |
| C(10) | 21(2) | 28(2) | 24(2)  | -4(1) | 6(1)   | -3(1)  |
| C(8)  | 80(3) | 29(2) | 38(2)  | -2(2) | 7(2)   | 9(2)   |
| C(5)  | 39(2) | 50(3) | 30(2)  | -3(2) | -7(2)  | 9(2)   |
| C(14) | 48(3) | 42(2) | 42(3)  | 5(2)  | 7(2)   | 17(2)  |
| C(13) | 57(3) | 53(3) | 28(2)  | 4(2)  | 6(2)   | 16(2)  |
| C(12) | 48(3) | 42(2) | 28(2)  | -9(2) | 11(2)  | 7(2)   |
| C(9)  | 69(3) | 56(3) | 54(3)  | -2(2) | -13(3) | -23(3) |
| C(18) | 33(3) | 81(4) | 167(8) | 10(5) | 25(4)  | 3(3)   |
| C(17) | 82(5) | 68(4) | 136(7) | 16(4) | 8(4)   | 46(4)  |

---

**Table 23. Hydrogen coordinates ( $\times 10^4$ ) and isotropic displacement parameters ( $\text{\AA}^2 \times 10^3$ ) for 3a.**

---

|  | x | y | z | U(eq) |
|--|---|---|---|-------|
|--|---|---|---|-------|

---



|        |       |      |       |     |
|--------|-------|------|-------|-----|
| H(6)   | -1002 | -567 | 2327  | 43  |
| H(15)  | 5296  | 986  | 7478  | 41  |
| H(4)   | 1056  | 1847 | 575   | 50  |
| H(3)   | 4026  | 2485 | 1790  | 44  |
| H(8A)  | 4524  | 4239 | 3460  | 75  |
| H(8B)  | 4098  | 3934 | 4519  | 75  |
| H(8C)  | 2754  | 3164 | 3559  | 75  |
| H(5)   | -1443 | 307  | 834   | 50  |
| H(14)  | 6265  | 518  | 9095  | 52  |
| H(13)  | 5946  | 1841 | 10374 | 55  |
| H(12)  | 4558  | 3618 | 10021 | 47  |
| H(9A)  | 7697  | 3291 | 5243  | 99  |
| H(9B)  | 8256  | 4036 | 4359  | 99  |
| H(9C)  | 8824  | 2705 | 4451  | 99  |
| H(18A) | 410   | 2855 | 8378  | 140 |
| H(18B) | -1340 | 3493 | 7694  | 140 |
| H(18C) | -997  | 3682 | 8863  | 140 |
| H(17A) | -345  | 5931 | 8616  | 141 |
| H(17B) | -329  | 5729 | 7474  | 141 |
| H(17C) | 1737  | 6387 | 8215  | 141 |

---

Crystal structure of bis((2-(diisopropylcarbamoyl)phenyl)selanyl)mercury 3c (CCDC No. 1059008)

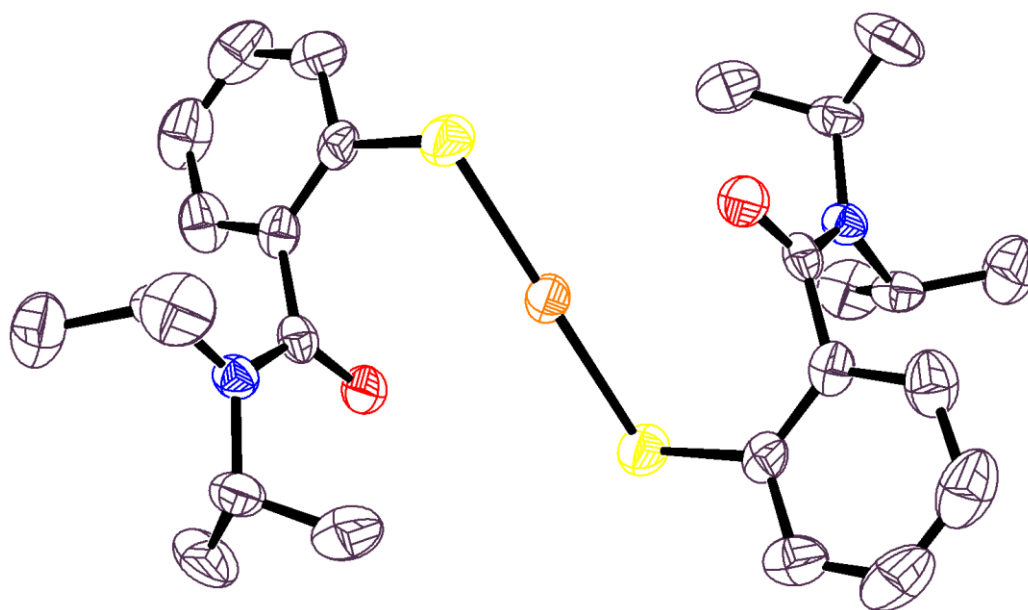

Packing diagram for 3c

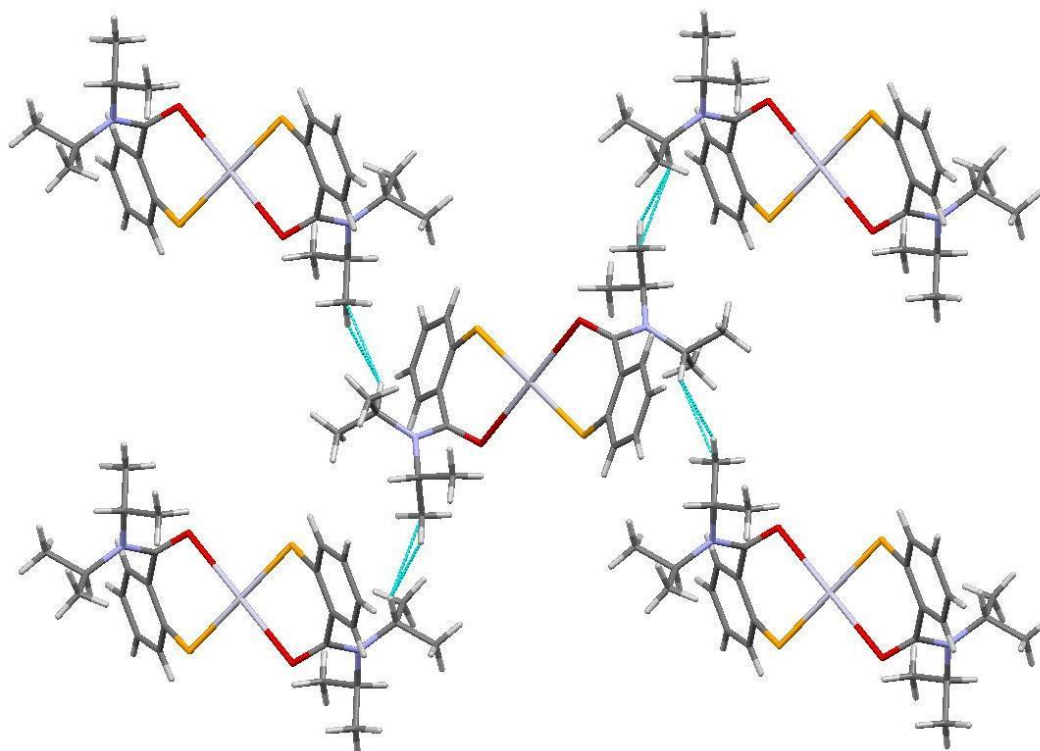

**Table 24. Crystal data and structure refinement for 3c**

|                                   |                                                                                                          |
|-----------------------------------|----------------------------------------------------------------------------------------------------------|
| Identification code               | Saket_02                                                                                                 |
| Empirical formula                 | C <sub>26</sub> H <sub>36</sub> Hg N <sub>2</sub> O <sub>2</sub> Se <sub>2</sub>                         |
| Formula weight                    | 767.08                                                                                                   |
| Temperature                       | 296(2) K                                                                                                 |
| Wavelength                        | 0.71073 Å                                                                                                |
| Crystal system                    | Monoclinic                                                                                               |
| Space group                       | P 2 <sub>1</sub> /c                                                                                      |
| Unit cell dimensions              | a = 7.5402(6) Å      α = 90°.<br>b = 13.4630(8) Å      β = 99.456(3)°.<br>c = 14.1093(12) Å     γ = 90°. |
| Volume                            | 1412.83(19) Å <sup>3</sup>                                                                               |
| Z                                 | 2                                                                                                        |
| Density (calculated)              | 1.803 g/cm <sup>3</sup>                                                                                  |
| Absorption coefficient            | 8.047 mm <sup>-1</sup>                                                                                   |
| F(000)                            | 740                                                                                                      |
| Theta range for data collection   | 2.739 to 25.721°.                                                                                        |
| Index ranges                      | -9<=h<=9, -16<=k<=16, -16<=l<=17                                                                         |
| Reflections collected             | 12457                                                                                                    |
| Independent reflections           | 2695 [R(int) = 0.0501]                                                                                   |
| Completeness to theta = 25.242°   | 100.0 %                                                                                                  |
| Absorption correction             | None                                                                                                     |
| Refinement method                 | Full-matrix least-squares on F <sup>2</sup>                                                              |
| Data / restraints / parameters    | 2695 / 0 / 155                                                                                           |
| Goodness-of-fit on F <sup>2</sup> | 1.017                                                                                                    |
| Final R indices [I>2sigma(I)]     | R1 = 0.0267, wR2 = 0.0472                                                                                |
| R indices (all data)              | R1 = 0.0461, wR2 = 0.0521                                                                                |
| Extinction coefficient            | n/a                                                                                                      |
| Largest diff. peak and hole       | 0.496 and -0.349 e.Å <sup>-3</sup>                                                                       |

**Table 25. Atomic coordinates (  $\times 10^4$ ) and equivalent isotropic displacement parameters ( $\text{\AA}^2 \times 10^3$ ) for 3c. U(eq) is defined as one third of the trace of the orthogonalized  $U^{ij}$  tensor.**

|       | x       | y       | z       | U(eq) |
|-------|---------|---------|---------|-------|
| Hg(1) | 0       | 5000    | 5000    | 39(1) |
| Se(1) | 1594(1) | 3748(1) | 6052(1) | 51(1) |
| O(1)  | 1121(3) | 6490(2) | 6416(2) | 45(1) |
| N(1)  | 4110(4) | 6259(2) | 6831(2) | 33(1) |
| C(6)  | 2020(5) | 5258(3) | 7572(3) | 36(1) |
| C(7)  | 2398(5) | 6047(2) | 6878(3) | 32(1) |
| C(1)  | 1525(5) | 4282(3) | 7307(3) | 35(1) |
| C(11) | 4576(5) | 7139(2) | 6297(3) | 44(1) |
| C(8)  | 5613(5) | 5630(3) | 7292(3) | 40(1) |
| C(5)  | 2062(6) | 5540(3) | 8520(3) | 52(1) |
| C(10) | 6738(6) | 5258(3) | 6570(4) | 64(1) |
| C(2)  | 1077(5) | 3629(3) | 7995(3) | 50(1) |
| C(13) | 3973(6) | 8094(3) | 6722(4) | 69(2) |
| C(12) | 3927(7) | 7071(3) | 5221(3) | 69(1) |
| C(4)  | 1662(6) | 4882(4) | 9201(4) | 67(1) |
| C(3)  | 1184(6) | 3933(4) | 8941(4) | 65(1) |
| C(9)  | 6741(6) | 6143(4) | 8134(3) | 71(2) |

**Table 26. Selected bond lengths [Å] for 3c.**

|          |            |          |           |
|----------|------------|----------|-----------|
| Hg1—Se1i | 2.4301 (4) | C5—H5    | 0.95      |
| Hg1—Se1  | 2.4301 (4) | C10—H10A | 0.98      |
| Se1—C1   | 1.919 (4)  | C10—H10B | 0.98      |
| O1—C7    | 1.225 (4)  | C10—H10C | 0.98      |
| N1—C7    | 1.334 (4)  | C2—C3    | 1.386 (6) |
| N1—C11   | 1.477 (4)  | C2—H2    | 0.95      |
| N1—C8    | 1.478 (4)  | C13—H13A | 0.98      |
| C6—C5    | 1.385 (6)  | C13—H13B | 0.98      |
| C6—C1    | 1.401 (5)  | C13—H13C | 0.98      |
| C6—C7    | 1.504 (5)  | C12—H12A | 0.98      |
| C1—C2    | 1.392 (5)  | C12—H12B | 0.98      |
| C11—C13  | 1.519 (5)  | C12—H12C | 0.98      |
| C11—C12  | 1.520 (6)  | C4—C3    | 1.361 (6) |
| C11—H11  | 1          | C4—H4    | 0.95      |
| C8—C9    | 1.510 (5)  | C3—H3    | 0.95      |
| C8—C10   | 1.513 (6)  | C9—H9A   | 0.98      |
| C8—H8    | 1          | C9—H9B   | 0.98      |
| C5—C4    | 1.377 (6)  | C9—H9C   | 0.98      |

---

**Table 27. Selected bond angles [°] for 3c.**

|              |              |               |           |
|--------------|--------------|---------------|-----------|
| Se1i—Hg1—Se1 | 179.999 (13) | H10A—C10—H10B | 109.5     |
| C1—Se1—Hg1   | 102.58 (10)  | C8—C10—H10C   | 109.5     |
| C7—N1—C11    | 120.7 (3)    | H10A—C10—H10C | 109.5     |
| C7—N1—C8     | 122.3 (3)    | H10B—C10—H10C | 109.5     |
| C11—N1—C8    | 117.1 (3)    | C3—C2—C1      | 120.2 (4) |
| C5—C6—C1     | 118.6 (4)    | C3—C2—H2      | 119.9     |
| C5—C6—C7     | 117.3 (3)    | C1—C2—H2      | 119.9     |

|             |           |               |           |
|-------------|-----------|---------------|-----------|
| C1—C6—C7    | 124.0 (4) | C11—C13—H13A  | 109.5     |
| O1—C7—N1    | 123.5 (3) | C11—C13—H13B  | 109.5     |
| O1—C7—C6    | 118.3 (3) | H13A—C13—H13B | 109.5     |
| N1—C7—C6    | 118.2 (3) | C11—C13—H13C  | 109.5     |
| C2—C1—C6    | 119.4 (4) | H13A—C13—H13C | 109.5     |
| C2—C1—Se1   | 117.0 (3) | H13B—C13—H13C | 109.5     |
| C6—C1—Se1   | 123.5 (3) | C11—C12—H12A  | 109.5     |
| N1—C11—C13  | 111.4 (4) | C11—C12—H12B  | 109.5     |
| N1—C11—C12  | 113.4 (3) | H12A—C12—H12B | 109.5     |
| C13—C11—C12 | 112.2 (4) | C11—C12—H12C  | 109.5     |
| N1—C11—H11  | 106.4     | H12A—C12—H12C | 109.5     |
| C13—C11—H11 | 106.4     | H12B—C12—H12C | 109.5     |
| C12—C11—H11 | 106.4     | C3—C4—C5      | 119.6 (5) |
| N1—C8—C9    | 112.1 (3) | C3—C4—H4      | 120.2     |
| N1—C8—C10   | 111.6 (4) | C5—C4—H4      | 120.2     |
| C9—C8—C10   | 112.0 (4) | C4—C3—C2      | 120.5 (5) |
| N1—C8—H8    | 106.9     | C4—C3—H3      | 119.7     |
| C9—C8—H8    | 106.9     | C2—C3—H3      | 119.7     |
| C10—C8—H8   | 106.9     | C8—C9—H9A     | 109.5     |
| C4—C5—C6    | 121.6 (4) | C8—C9—H9B     | 109.5     |
| C4—C5—H5    | 119.2     | H9A—C9—H9B    | 109.5     |
| C6—C5—H5    | 119.2     | C8—C9—H9C     | 109.5     |
| C8—C10—H10A | 109.5     | H9A—C9—H9C    | 109.5     |
| C8—C10—H10B | 109.5     | H9B—C9—H9C    | 109.5     |

---

Symmetry transformations used to generate equivalent atoms:

#1 -x,-y+1,-z+1

**Table 28.** Anisotropic displacement parameters ( $\text{\AA}^2 \times 10^3$ ) for 3c. The anisotropic displacement factor exponent takes the form:  $-2\pi^2 [ h^2 a^{*2} U_{11} + \dots + 2 h k a^* b^* U_{12} ]$

|       | U11   | U22    | U33    | U23    | U13   | U12   |
|-------|-------|--------|--------|--------|-------|-------|
| Hg(1) | 40(1) | 41(1)  | 34(1)  | 0(1)   | 2(1)  | 1(1)  |
| Se(1) | 68(1) | 38(1)  | 45(1)  | -1(1)  | 0(1)  | 13(1) |
| O(1)  | 34(2) | 41(2)  | 55(2)  | 5(1)   | -7(1) | -1(1) |
| N(1)  | 28(2) | 31(2)  | 39(2)  | 0(2)   | 6(1)  | -1(1) |
| C(6)  | 25(2) | 50(2)  | 33(2)  | -2(2)  | 6(2)  | 0(2)  |
| C(7)  | 34(2) | 31(2)  | 32(2)  | -11(2) | 5(2)  | 0(2)  |
| C(1)  | 20(2) | 46(2)  | 38(2)  | 5(2)   | -1(2) | 3(2)  |
| C(11) | 37(2) | 33(2)  | 62(3)  | 8(2)   | 6(2)  | -5(2) |
| C(8)  | 31(2) | 33(2)  | 56(3)  | 9(2)   | 9(2)  | 1(2)  |
| C(5)  | 46(3) | 67(3)  | 45(3)  | -10(2) | 11(2) | -6(2) |
| C(10) | 45(3) | 66(3)  | 84(4)  | -2(3)  | 19(3) | 18(2) |
| C(2)  | 30(2) | 52(3)  | 67(3)  | 19(2)  | 8(2)  | -1(2) |
| C(13) | 63(3) | 31(2)  | 109(5) | -12(3) | 2(3)  | -3(2) |
| C(12) | 86(4) | 64(3)  | 59(4)  | 19(3)  | 17(3) | -9(3) |
| C(4)  | 55(3) | 109(4) | 39(3)  | 4(3)   | 16(2) | 0(3)  |
| C(3)  | 53(3) | 98(4)  | 51(3)  | 28(3)  | 26(3) | 5(3)  |
| C(9)  | 54(3) | 92(4)  | 61(4)  | 2(3)   | -8(3) | 0(3)  |

**Table 29. Hydrogen coordinates (  $\times 10^4$ ) and isotropic displacement parameters ( $\text{\AA}^2 \times 10^3$ ) for 3c.**

|        | x    | y    | z    | U(eq) |
|--------|------|------|------|-------|
| H(11)  | 5919 | 7165 | 6388 | 53    |
| H(8)   | 5068 | 5032 | 7552 | 48    |
| H(5)   | 2375 | 6204 | 8704 | 63    |
| H(10A) | 5947 | 5000 | 6003 | 96    |
| H(10B) | 7537 | 4728 | 6861 | 96    |
| H(10C) | 7459 | 5806 | 6380 | 96    |
| H(2)   | 696  | 2973 | 7816 | 60    |
| H(13A) | 2657 | 8111 | 6636 | 103   |
| H(13B) | 4407 | 8665 | 6396 | 103   |
| H(13C) | 4465 | 8122 | 7409 | 103   |
| H(12A) | 4306 | 6435 | 4981 | 103   |
| H(12B) | 4444 | 7617 | 4897 | 103   |
| H(12C) | 2612 | 7117 | 5091 | 103   |
| H(4)   | 1719 | 5089 | 9849 | 80    |
| H(3)   | 922  | 3476 | 9412 | 78    |
| H(9A)  | 7276 | 6744 | 7910 | 107   |
| H(9B)  | 7697 | 5694 | 8430 | 107   |
| H(9C)  | 5980 | 6323 | 8608 | 107   |



**Table 30. Crystal data and structure refinement for 3d.**

|                                   |                                                                                  |                         |
|-----------------------------------|----------------------------------------------------------------------------------|-------------------------|
| Identification code               | shelx_arun191015                                                                 |                         |
| Empirical formula                 | C <sub>20</sub> H <sub>22</sub> Hg N <sub>4</sub> O <sub>6</sub> Se <sub>2</sub> |                         |
| Formula weight                    | 772.92                                                                           |                         |
| Temperature                       | 296(2) K                                                                         |                         |
| Wavelength                        | 0.71073 Å                                                                        |                         |
| Crystal system                    | Triclinic                                                                        |                         |
| Space group                       | P $\bar{1}$                                                                      |                         |
| Unit cell dimensions              | a = 8.9938(5) Å                                                                  | $\alpha$ = 100.352(3)°. |
|                                   | b = 10.4786(6) Å                                                                 | $\beta$ = 98.708(3)°.   |
|                                   | c = 13.1186(7) Å                                                                 | $\gamma$ = 99.288(3)°.  |
| Volume                            | 1179.35(11) Å <sup>3</sup>                                                       |                         |
| Z                                 | 2                                                                                |                         |
| Density (calculated)              | 2.177 g/cm <sup>3</sup>                                                          |                         |
| Absorption coefficient            | 9.656 mm <sup>-1</sup>                                                           |                         |
| F(000)                            | 732                                                                              |                         |
| Crystal size                      | 0.2 x 0.19 x 0.16 mm <sup>3</sup>                                                |                         |
| Theta range for data collection   | 1.606 to 25.242°.                                                                |                         |
| Reflections collected             | 5605                                                                             |                         |
| Independent reflections           | 3709 [R(int) = 0.039]                                                            |                         |
| Completeness to theta = 25.242°   | 99.6 %                                                                           |                         |
| Absorption correction             | None                                                                             |                         |
| Refinement method                 | Full-matrix least-squares on F <sup>2</sup>                                      |                         |
| Data / restraints / parameters    | 5605 / 72 / 362                                                                  |                         |
| Goodness-of-fit on F <sup>2</sup> | 1.021                                                                            |                         |
| Final R indices [I > 2sigma(I)]   | R1 = 0.0384, wR2 = 0.0722                                                        |                         |
| R indices (all data)              | R1 = 0.0751, wR2 = 0.0857                                                        |                         |
| Extinction coefficient            | n/a                                                                              |                         |
| Largest diff. peak and hole       | 1.116 and -1.052 e.Å <sup>-3</sup>                                               |                         |

**Table 31. Selected bond lengths [Å] for shelx\_arun191015.**

|         |            |          |            |
|---------|------------|----------|------------|
| Hg1—Se1 | 2.4549 (6) | C13—C14  | 1.370 (9)  |
| Hg1—Se2 | 2.4519 (7) | C13—H13  | 0.87 (5)   |
| Se1—C19 | 1.927 (5)  | C14—C15  | 1.361 (9)  |
| Se2—C12 | 1.922 (6)  | C14—H14  | 0.94 (7)   |
| O3—C8   | 1.237 (6)  | C5—H5    | 0.87 (6)   |
| N3B—H3B | 0.8600     | C20—H20A | 0.9700     |
| N3B—C8  | 1.37 (3)   | C20—H20B | 0.9700     |
| N3B—C1B | 1.47 (3)   | C20—C21  | 1.356 (11) |
| O2—N1   | 1.217 (7)  | C21—H21A | 0.9700     |
| C8—C2   | 1.496 (7)  | C21—H21B | 0.9700     |
| C8—N3A  | 1.29 (2)   | C21—C11  | 1.246 (11) |
| C3—C2   | 1.388 (7)  | C11—H11A | 0.9600     |
| C3—C4   | 1.372 (7)  | C11—H11B | 0.9600     |
| C3—H3   | 0.92 (5)   | C11—H11C | 0.9600     |
| C2—C19  | 1.388 (7)  | C1A—H1AA | 0.9700     |
| O9—C1   | 1.210 (7)  | C1A—H1AB | 0.9700     |
| C19—C6  | 1.385 (7)  | C1A—C2A  | 1.46 (2)   |
| N2—O7   | 1.205 (8)  | C1A—N3A  | 1.46 (2)   |
| N2—C15  | 1.470 (8)  | C1B—H1BA | 0.9700     |
| N2—O8   | 1.204 (8)  | C1B—H1BB | 0.9700     |

|         |           |           |          |
|---------|-----------|-----------|----------|
| C12—C17 | 1.383 (8) | C1B—C2B   | 1.52 (3) |
| C12—C13 | 1.387 (8) | C2A—H2AA  | 0.9700   |
| N1—O1   | 1.212 (7) | C2A—H2AB  | 0.9700   |
| N1—C4   | 1.470 (7) | C2A—C3AB  | 1.47 (3) |
| C6—C5   | 1.374 (9) | C2B—H2BA  | 0.9700   |
| C6—H6   | 0.91 (6)  | C2B—H2BB  | 0.9700   |
| C4—C5   | 1.369 (8) | C2B—C3AA  | 1.41 (4) |
| C17—C16 | 1.388 (9) | C3AB—H3AA | 0.9600   |
| C17—C1  | 1.512 (8) | C3AB—H3AB | 0.9600   |
| N4—H4   | 0.8600    | C3AB—H3AC | 0.9600   |
| N4—C1   | 1.285 (8) | C3AA—H3AD | 0.9600   |
| N4—C20  | 1.457 (8) | C3AA—H3AE | 0.9600   |
| C16—C15 | 1.366 (8) | C3AA—H3AF | 0.9600   |
| C16—H16 | 0.89 (6)  | N3A—H3A   | 0.8600   |

**Table 32. Selected bond angles [°] for shelx\_arun191015.**

|             |            |               |           |
|-------------|------------|---------------|-----------|
| Se2—Hg1—Se1 | 171.88 (2) | C14—C15—C16   | 122.0 (6) |
| C19—Se1—Hg1 | 99.96 (15) | N4—C20—H20A   | 108.7     |
| C12—Se2—Hg1 | 97.25 (16) | N4—C20—H20B   | 108.7     |
| C8—N3B—H3B  | 95.5       | H20A—C20—H20B | 107.6     |
| C8—N3B—C1B  | 122 (3)    | C21—C20—N4    | 114.3 (7) |
| C1B—N3B—H3B | 99.4       | C21—C20—H20A  | 108.7     |

|             |            |               |            |
|-------------|------------|---------------|------------|
| O3—C8—N3B   | 122.9 (17) | C21—C20—H20B  | 108.7      |
| O3—C8—C2    | 121.7 (5)  | C20—C21—H21A  | 102.0      |
| O3—C8—N3A   | 122.5 (13) | C20—C21—H21B  | 102.0      |
| N3B—C8—C2   | 114.4 (17) | H21A—C21—H21B | 104.7      |
| N3A—C8—C2   | 115.2 (13) | C11—C21—C20   | 140.3 (13) |
| C2—C3—H3    | 121 (3)    | C11—C21—H21A  | 102.0      |
| C4—C3—C2    | 119.2 (6)  | C11—C21—H21B  | 102.0      |
| C4—C3—H3    | 120 (3)    | C21—C11—H11A  | 109.5      |
| C3—C2—C8    | 118.1 (5)  | C21—C11—H11B  | 109.5      |
| C19—C2—C8   | 122.3 (4)  | C21—C11—H11C  | 109.5      |
| C19—C2—C3   | 119.6 (5)  | H11A—C11—H11B | 109.5      |
| C2—C19—Se1  | 123.2 (4)  | H11A—C11—H11C | 109.5      |
| C6—C19—Se1  | 117.2 (4)  | H11B—C11—H11C | 109.5      |
| C6—C19—C2   | 119.6 (5)  | H1AA—C1A—H1AB | 108.0      |
| O7—N2—C15   | 118.9 (7)  | C2A—C1A—H1AA  | 109.4      |
| O8—N2—O7    | 122.9 (7)  | C2A—C1A—H1AB  | 109.4      |
| O8—N2—C15   | 118.2 (7)  | N3A—C1A—H1AA  | 109.4      |
| C17—C12—Se2 | 122.7 (4)  | N3A—C1A—H1AB  | 109.4      |
| C17—C12—C13 | 118.9 (5)  | N3A—C1A—C2A   | 111.3 (15) |
| C13—C12—Se2 | 118.3 (5)  | N3B—C1B—H1BA  | 109.3      |
| O2—N1—C4    | 118.5 (6)  | N3B—C1B—H1BB  | 109.3      |

|             |           |                |            |
|-------------|-----------|----------------|------------|
| O1—N1—O2    | 123.3 (6) | N3B—C1B—C2B    | 111.5 (19) |
| O1—N1—C4    | 118.2 (6) | H1BA—C1B—H1BB  | 108.0      |
| C19—C6—H6   | 118 (4)   | C2B—C1B—H1BA   | 109.3      |
| C5—C6—C19   | 120.7 (6) | C2B—C1B—H1BB   | 109.3      |
| C5—C6—H6    | 121 (4)   | C1A—C2A—H2AA   | 108.6      |
| C3—C4—N1    | 119.0 (6) | C1A—C2A—H2AB   | 108.6      |
| C5—C4—C3    | 121.9 (5) | C1A—C2A—C3AB   | 115 (2)    |
| C5—C4—N1    | 119.1 (5) | H2AA—C2A—H2AB  | 107.6      |
| C12—C17—C16 | 119.6 (5) | C3AB—C2A—H2AA  | 108.6      |
| C12—C17—C1  | 122.0 (6) | C3AB—C2A—H2AB  | 108.6      |
| C16—C17—C1  | 118.4 (6) | C1B—C2B—H2BA   | 110.4      |
| C1—N4—H4    | 117.6     | C1B—C2B—H2BB   | 110.4      |
| C1—N4—C20   | 124.7 (6) | H2BA—C2B—H2BB  | 108.6      |
| C20—N4—H4   | 117.6     | C3AA—C2B—C1B   | 106 (2)    |
| C17—C16—H16 | 122 (4)   | C3AA—C2B—H2BA  | 110.4      |
| C15—C16—C17 | 119.5 (6) | C3AA—C2B—H2BB  | 110.4      |
| C15—C16—H16 | 118 (4)   | C2A—C3AB—H3AA  | 109.5      |
| C12—C13—H13 | 119 (3)   | C2A—C3AB—H3AB  | 109.5      |
| C14—C13—C12 | 121.5 (7) | C2A—C3AB—H3AC  | 109.5      |
| C14—C13—H13 | 120 (3)   | H3AA—C3AB—H3AB | 109.5      |
| C13—C14—H14 | 121 (4)   | H3AA—C3AB—H3AC | 109.5      |

|             |           |                |         |
|-------------|-----------|----------------|---------|
| C15—C14—C13 | 118.4 (6) | H3AB—C3AB—H3AC | 109.5   |
| C15—C14—H14 | 120 (4)   | C2B—C3AA—H3AD  | 109.5   |
| O9—C1—C17   | 119.7 (6) | C2B—C3AA—H3AE  | 109.5   |
| O9—C1—N4    | 123.7 (6) | C2B—C3AA—H3AF  | 109.5   |
| N4—C1—C17   | 116.5 (5) | H3AD—C3AA—H3AE | 109.5   |
| C6—C5—H5    | 117 (4)   | H3AD—C3AA—H3AF | 109.5   |
| C4—C5—C6    | 118.9 (6) | H3AE—C3AA—H3AF | 109.5   |
| C4—C5—H5    | 124 (4)   | C8—N3A—C1A     | 124 (2) |
| C16—C15—N2  | 119.3 (6) | C8—N3A—H3A     | 118.1   |
| C14—C15—N2  | 118.7 (6) | C1A—N3A—H3A    | 118.1   |

---
